# Supplementary material for: Identification of evolutionarily conserved genetic regulators of cellular aging
Source: PubMed Central journal article supplement (PMC2997327; doi:10.1111/j.1474-9726.2010.00637.x), 2010-12
Supplement: acel0009-1084-SD5.pdf [file acel0009-1084-SD5.pdf]

| Id           | GenBank     | UniGene    | Description                                               | Symbol    | EG  | upregulated<br>in EG1 | downregulated<br>in EG1 | upregulated<br>in EG2 | downregulated<br>in EG2 | EG1 p-value | EG1 q-value<br>(Storey)           | EG2 p-value | EG2 q-value<br>(Storey) |
|--------------|-------------|------------|-----------------------------------------------------------|-----------|-----|-----------------------|-------------------------|-----------------------|-------------------------|-------------|-----------------------------------|-------------|-------------------------|
| 219282_s_at  | NM_015930   | Hs.279746  | transient receptor potential cation channel, subfamily    | TRPV2     | EG1 | 4                     | 10                      | 5                     | 1                       | 2,15E-11    | 0,0029338410,0147492140,111110101 |             |                         |
| 1555996_s_at | AI332397    | Hs.478553  | eukaryotic translation initiation factor 4A, isoform 2    | EIF4A2    | EG1 | 10                    | 3                       | 6                     | 2                       | 6,10E-10    | 0,0029338410,0005786180,011359908 |             |                         |
| 201468_s_at  | NM_000903   | Hs.406515  | NAD(P)H dehydrogenase, quinone 1                          | NQO1      | EG1 | 9                     | 4                       | 3                     | 2                       | 6,10E-10    | 0,0029338410,0540847830,274766231 |             |                         |
| 1555989_at   | AA890373    | Hs.19156   | dishevelled associated activator of morphogenesis 1       | DAAM1     | EG1 | 8                     | 4                       | 5                     | 3                       | 1,28E-08    | 0,0029338410,0005786180,011359908 |             |                         |
| 218252_at    | NM_018204   | Hs.444028  | cytoskeleton associated protein 2                         | CKAP2     | EG1 | 11                    | 1                       | 4                     | 4                       | 1,28E-08    | 0,0029338410,0005786180,011359908 |             |                         |
| 201123_s_at  | NM_001970   | Hs.534314  | eukaryotic translation initiation factor 5A               | EIF5A     | EG1 | 11                    | 1                       | 4                     | 2                       | 1,28E-08    | 0,0029338410,0147492140,111110101 |             |                         |
| 203028_s_at  | NM_000101   | Hs.513803  | cytochrome b-245, alpha polypeptide                       | CYBA      | EG1 | 3                     | 9                       | 5                     | 1                       | 1,28E-08    | 0,0029338410,0147492140,111110101 |             |                         |
| 212366_at    | BF223237    | Hs.485892  | zinc finger protein 292                                   | ZNF292    | EG1 | 8                     | 4                       | 3                     | 3                       | 1,28E-08    | 0,0029338410,0147492140,111110101 |             |                         |
| 225191_at    | AL565767    | Hs.501309  | cold inducible RNA binding protein                        | CIRBP     | EG1 | 8                     | 4                       | 3                     | 3                       | 1,28E-08    | 0,0029338410,0147492140,111110101 |             |                         |
| 225767_at    | AI825833    | Hs.370699  |                                                           | LOC284801 | EG1 | 7                     | 5                       | 1                     | 5                       | 1,28E-08    | 0,0029338410,0147492140,111110101 |             |                         |
| 228273_at    | BG165011    | Hs.274448  |                                                           | FLJ11029  | EG1 | 5                     | 7                       | 2                     | 4                       | 1,28E-08    | 0,0029338410,0147492140,111110101 |             |                         |
| 229390_at    | AV734646    | Hs.381220  |                                                           | LOC441168 | EG1 | 5                     | 7                       | 3                     | 3                       | 1,28E-08    | 0,0029338410,0147492140,111110101 |             |                         |
| 239577_at    | AV699781    |            |                                                           |           | EG1 | 10                    | 2                       | 5                     | 1                       | 1,28E-08    | 0,0029338410,0147492140,111110101 |             |                         |
| 235419_at    | AW612461    | Hs.11169   | ERBB receptor feedback inhibitor 1                        | ERRFI1    | EG1 | 7                     | 5                       | 3                     | 1                       | 1,28E-08    | 0,0029338410,1581335050,559565828 |             |                         |
| 201310_s_at  | NM_004772   | Hs.483067  | chromosome 5 open reading frame 13                        | C5orf13   | EG1 | 4                     | 7                       | 5                     | 3                       | 2,08E-07    | 0,0029338410,0005786180,011359908 |             |                         |
| 202589_at    | NM_001071   | Hs.369762  | thymidylate synthetase                                    | TYMS      | EG1 | 4                     | 7                       | 2                     | 6                       | 2,08E-07    | 0,0029338410,0005786180,011359908 |             |                         |
| 204127_at    | BC000149    | Hs.115474  | replication factor C (activator 1) 3, 38kDa               | RFC3      | EG1 | 10                    | 1                       | 3                     | 5                       | 2,08E-07    | 0,0029338410,0005786180,011359908 |             |                         |
| 205193_at    | NM_012323   | Hs.517617  | v-maf musculoaponeurotic fibrosarcoma oncogene ho         | MAFF      | EG1 | 8                     | 3                       | 5                     | 3                       | 2,08E-07    | 0,0029338410,0005786180,011359908 |             |                         |
| 209211_at    | AF132818    | Hs.508234  | Kruppel-like factor 5 (intestinal)                        | KLF5      | EG1 | 7                     | 4                       | 2                     | 6                       | 2,08E-07    | 0,0029338410,0005786180,011359908 |             |                         |
| 219049_at    | NM_018371   | Hs.387794  |                                                           | ChGn      | EG1 | 2                     | 9                       | 2                     | 6                       | 2,08E-07    | 0,0029338410,0005786180,011359908 |             |                         |
| 223255_at    | AA642341    | Hs.509008  | KIAA1333                                                  | KIAA1333  | EG1 | 11                    | 0                       | 4                     | 4                       | 2,08E-07    | 0,0029338410,0005786180,011359908 |             |                         |
| 228974_at    | AI816281    | Hs.20506   | zinc finger protein 677                                   | ZNF677    | EG1 | 8                     | 3                       | 5                     | 3                       | 2,08E-07    | 0,0029338410,0005786180,011359908 |             |                         |
| AFFX-PheX-M  | AFFX-PHEX-M |            |                                                           |           | EG1 | 5                     | 6                       | 5                     | 3                       | 2,08E-07    | 0,0029338410,0005786180,011359908 |             |                         |
| 216237_s_at  | AA807529    | Hs.517582  | MCM5 minichromosome maintenance deficient 5, cell         | MCM5      | EG1 | 5                     | 6                       | 2                     | 5                       | 2,08E-07    | 0,0029338410,0032420520,038332332 |             |                         |
| 224407_s_at  | AF344882    | Hs.444247  |                                                           | MASK      | EG1 | 10                    | 1                       | 4                     | 3                       | 2,08E-07    | 0,0029338410,0032420520,038332332 |             |                         |
| 201792_at    | NM_001129   | Hs.439463  | AE binding protein 1                                      | AEBP1     | EG1 | 3                     | 8                       | 2                     | 4                       | 2,08E-07    | 0,0029338410,0147492140,111110101 |             |                         |
| 202581_at    | NM_005346   | Hs.274402  | heat shock 70kDa protein 1B                               | HSPA1B    | EG1 | 10                    | 1                       | 3                     | 3                       | 2,08E-07    | 0,0029338410,0147492140,111110101 |             |                         |
| 202688_at    | NM_003810   | Hs.478275  | tumor necrosis factor (ligand) superfamily, member 1      | TNFSF10   | EG1 | 2                     | 9                       | 1                     | 5                       | 2,08E-07    | 0,0029338410,0147492140,111110101 |             |                         |
| 214132_at    | BG232034    | Hs.271135  | ATP synthase, H+ transporting, mitochondrial F1 comp      | ATP5C1    | EG1 | 8                     | 3                       | 5                     | 1                       | 2,08E-07    | 0,0029338410,0147492140,111110101 |             |                         |
| 214820_at    | AJ002572    | Hs.314338  | bromodomain and WD repeat domain containing 1             | BRWD1     | EG1 | 9                     | 2                       | 2                     | 4                       | 2,08E-07    | 0,0029338410,0147492140,111110101 |             |                         |
| 226998_at    | AL556909    | Hs.555985  | NMDA receptor regulated 1                                 | NARG1     | EG1 | 11                    | 0                       | 4                     | 2                       | 2,08E-07    | 0,0029338410,0147492140,111110101 |             |                         |
| 228334_x_at  | AI633734    | Hs.555989  | KIAA1712                                                  | KIAA1712  | EG1 | 9                     | 2                       | 3                     | 3                       | 2,08E-07    | 0,0029338410,0147492140,111110101 |             |                         |
| 229391_s_at  | AV734646    | Hs.381220  |                                                           | LOC441168 | EG1 | 4                     | 7                       | 3                     | 3                       | 2,08E-07    | 0,0029338410,0147492140,111110101 |             |                         |
| 235412_at    | AI040887    | Hs.508738  | Rho guanine nucleotide exchange factor (GEF) 7            | ARHGEF7   | EG1 | 6                     | 5                       | 4                     | 2                       | 2,08E-07    | 0,0029338410,0147492140,111110101 |             |                         |
| 236114_at    | AI798118    | Hs.149261, | H runt-related transcription factor 1 (acute myeloid leuk | RUNX1     | EG1 | 0                     | 11                      | 6                     | 0                       | 2,08E-07    | 0,0029338410,0147492140,111110101 |             |                         |
| AFFX-PheX-3_ | AFFX-PHEX-3 |            |                                                           |           | EG1 | 5                     | 6                       | 3                     | 3                       | 2,08E-07    | 0,0029338410,0147492140,111110101 |             |                         |
| 201211_s_at  | AF061337    | Hs.380774  | DEAD (Asp-Glu-Ala-Asp) box polypeptide 3, X-linked        | DDX3X     | EG1 | 9                     | 2                       | 3                     | 2                       | 2,08E-07    | 0,0029338410,0540847830,274766231 |             |                         |
| 205092_x_at  | NM_014950   | Hs.400802  | zinc finger and BTB domain containing 1                   | ZBTB1     | EG1 | 8                     | 3                       | 2                     | 3                       | 2,08E-07    | 0,0029338410,0540847830,274766231 |             |                         |
| 207838_x_at  | NM_020524   | Hs.505806  | pre-B-cell leukemia transcription factor interacting pr   | PBXIP1    | EG1 | 5                     | 6                       | 1                     | 4                       | 2,08E-07    | 0,0029338410,0540847830,274766231 |             |                         |
| 209679_s_at  | BC003379    | Hs.206501  |                                                           | LOC57228  | EG1 | 5                     | 6                       | 3                     | 2                       | 2,08E-07    | 0,0029338410,0540847830,274766231 |             |                         |
| 221848_at    | AL121845    | Hs.11900   | zinc finger, CCCH-type with G patch domain                | ZGPAT     | EG1 | 2                     | 9                       | 4                     | 1                       | 2,08E-07    | 0,0029338410,0540847830,274766231 |             |                         |
| 226613_at    | AI742029    | Hs.444950  | TBC1 domain family, member 10A                            | TBC1D10A  | EG1 | 2                     | 9                       | 1                     | 4                       | 2,08E-07    | 0,0029338410,0540847830,274766231 |             |                         |
| 228328_at    | AI982758    |            |                                                           |           | EG1 | 9                     | 2                       | 2                     | 3                       | 2,08E-07    | 0,0029338410,0540847830,274766231 |             |                         |

|               |                  |                                            |                                                           |              |     |    |    |   |   |          |                                   |
|---------------|------------------|--------------------------------------------|-----------------------------------------------------------|--------------|-----|----|----|---|---|----------|-----------------------------------|
| 233014_at     | AK022980         | Hs.283652                                  | isopentenyl-diphosphate delta isomerase 1                 | IDI1         | EG1 | 8  | 3  | 3 | 2 | 2,08E-07 | 0,0029338410,0540847830,274766231 |
| 231975_s_at   | AK002183         | Hs.419195                                  |                                                           | FLJ35954     | EG1 | 11 | 0  | 3 | 1 | 2,08E-07 | 0,0029338410,1581335050,559565828 |
| 241242_at     | BE503118         | Hs.372003                                  | chromosome 9 open reading frame 10                        | C9orf10      | EG1 | 3  | 8  | 4 | 0 | 2,08E-07 | 0,0029338410,1581335050,559565828 |
| 207247_s_at   | NM_003411        | Hs.522845                                  | zinc finger protein, Y-linked                             | ZFY          | EG1 | 10 | 1  | 3 | 0 | 2,08E-07 | 0,0029338410,3636349230,911710613 |
| 211538_s_at   | U56725           | Hs.432648                                  | heat shock 70kDa protein 2                                | HSPA2        | EG1 | 7  | 4  | 2 | 1 | 2,08E-07 | 0,0029338410,3636349230,911710613 |
| 221135_s_at   | NM_014065        | Hs.100878                                  |                                                           | HT001        | EG1 | 9  | 2  | 2 | 0 | 2,08E-07 | 0,0029338410,6490161710,911710613 |
| 1552701_a_at  | NM_052889        | Hs.348365                                  |                                                           | COP1         | EG1 | 1  | 9  | 7 | 1 | 2,66E-06 | 0,0029338410,0005786180,011359908 |
| 1554609_at    | BC019340         | Hs.292791                                  |                                                           | MGC12965     | EG1 | 3  | 7  | 1 | 7 | 2,66E-06 | 0,0029338410,0005786180,011359908 |
| 204092_s_at   | NM_003600        | Hs.250822                                  | serine/threonine kinase 6                                 | STK6         | EG1 | 8  | 2  | 3 | 5 | 2,66E-06 | 0,0029338410,0005786180,011359908 |
| 204244_s_at   | NM_006716        | Hs.489037                                  |                                                           | ASK          | EG1 | 10 | 0  | 3 | 5 | 2,66E-06 | 0,0029338410,0005786180,011359908 |
| 204709_s_at   | NM_004856        | Hs.270845                                  | kinesin family member 23                                  | KIF23        | EG1 | 7  | 3  | 3 | 5 | 2,66E-06 | 0,0029338410,0005786180,011359908 |
| 207165_at     | NM_012485        | Hs.72550                                   | hyaluronan-mediated motility receptor (RHAMM)             | HMMR         | EG1 | 7  | 3  | 3 | 5 | 2,66E-06 | 0,0029338410,0005786180,011359908 |
| 211368_s_at   | U13700           | Hs.2490                                    | caspase 1, apoptosis-related cysteine peptidase (inter    | CASP1        | EG1 | 2  | 8  | 6 | 2 | 2,66E-06 | 0,0029338410,0005786180,011359908 |
| 212977_at     | AI817041         | Hs.471751                                  | chemokine orphan receptor 1                               | CMKOR1       | EG1 | 0  | 10 | 3 | 5 | 2,66E-06 | 0,0029338410,0005786180,011359908 |
| 217924_at     | AL523965         | Hs.485162                                  | chromosome 6 open reading frame 106                       | C6orf106     | EG1 | 7  | 3  | 8 | 0 | 2,66E-06 | 0,0029338410,0005786180,011359908 |
| 222040_at     | AI144007         | Hs.210850                                  | H heterogeneous nuclear ribonucleoprotein A1              | HNRPA1       | EG1 | 9  | 1  | 4 | 4 | 2,66E-06 | 0,0029338410,0005786180,011359908 |
| 222088_s_at   | AA778684         | Hs.210227                                  | solute carrier family 2 (facilitated glucose transporter) | SLC2A14      | EG1 | 5  | 5  | 4 | 4 | 2,66E-06 | 0,0029338410,0005786180,011359908 |
| 225902_at     | AW194716         | Hs.470544                                  | peptidyl-prolyl isomerase G (cyclophilin G)               | PPIG         | EG1 | 9  | 1  | 1 | 7 | 2,66E-06 | 0,0029338410,0005786180,011359908 |
| 228751_at     | AW975057         | Hs.406557                                  | CDC-like kinase 4                                         | CLK4         | EG1 | 7  | 3  | 5 | 3 | 2,66E-06 | 0,0029338410,0005786180,011359908 |
| 230461_s_at   | AI860326         | Hs.515016                                  | melanoma associated antigen (mutated) 1                   | MUM1         | EG1 | 7  | 3  | 4 | 4 | 2,66E-06 | 0,0029338410,0005786180,011359908 |
| 232797_at     | AU144005         | Hs.436873                                  | integrin, alpha V (vitronectin receptor, alpha polypept   | ITGAV        | EG1 | 4  | 6  | 8 | 0 | 2,66E-06 | 0,0029338410,0005786180,011359908 |
| 233899_x_at   | AK024296         | Hs.205742                                  | zinc finger and BTB domain containing 10                  | ZBTB10       | EG1 | 8  | 2  | 3 | 5 | 2,66E-06 | 0,0029338410,0005786180,011359908 |
| 235152_at     | AW293849         |                                            |                                                           |              | EG1 | 1  | 9  | 7 | 1 | 2,66E-06 | 0,0029338410,0005786180,011359908 |
| 235167_at     | BE972419         | Hs.528462, Hs.531664, Hs.547315, Hs.556385 |                                                           | DKFZp547E087 | EG1 | 8  | 2  | 5 | 3 | 2,66E-06 | 0,0029338410,0005786180,011359908 |
| 236402_at     | AW184034         | Hs.490366                                  | v-raf murine sarcoma viral oncogene homolog B1            | BRAF         | EG1 | 6  | 4  | 4 | 4 | 2,66E-06 | 0,0029338410,0005786180,011359908 |
| 236752_at     | AA913146         | Hs.407580                                  | plakophilin 4                                             | PKP4         | EG1 | 6  | 4  | 8 | 0 | 2,66E-06 | 0,0029338410,0005786180,011359908 |
| 238712_at     | BF801735         |                                            |                                                           |              | EG1 | 1  | 9  | 6 | 2 | 2,66E-06 | 0,0029338410,0005786180,011359908 |
| 243648_at     | AA280627         | Hs.532399                                  | zinc finger CCCH-type containing 11A                      | ZC3H11A      | EG1 | 3  | 7  | 5 | 3 | 2,66E-06 | 0,0029338410,0005786180,011359908 |
| AFFX-r2-Bs-th | AFFX-R2-BS-THR-3 |                                            |                                                           |              | EG1 | 5  | 5  | 6 | 2 | 2,66E-06 | 0,0029338410,0005786180,011359908 |
| 201774_s_at   | AK022511         | Hs.5719                                    |                                                           | CNAP1        | EG1 | 5  | 5  | 2 | 5 | 2,66E-06 | 0,0029338410,0032420520,038332332 |
| 202338_at     | NM_003258        | Hs.515122                                  | thymidine kinase 1, soluble                               | TK1          | EG1 | 5  | 5  | 2 | 5 | 2,66E-06 | 0,0029338410,0032420520,038332332 |
| 203109_at     | NM_003969        | Hs.406068                                  | ubiquitin-conjugating enzyme E2M (UBC12 homolog, y        | UBE2M        | EG1 | 7  | 3  | 4 | 3 | 2,66E-06 | 0,0029338410,0032420520,038332332 |
| 203422_at     | NM_002691        | Hs.279413                                  | polymerase (DNA directed), delta 1, catalytic subunit     | POLD1        | EG1 | 3  | 7  | 2 | 5 | 2,66E-06 | 0,0029338410,0032420520,038332332 |
| 206917_at     | NM_006572        | Hs.515018                                  | guanine nucleotide binding protein (G protein), alpha     | GNA13        | EG1 | 9  | 1  | 7 | 0 | 2,66E-06 | 0,0029338410,0032420520,038332332 |
| 209093_s_at   | K02920           | Hs.282997, H                               | glucosidase, beta, acid (includes glucosylceramidase)     | GBA          | EG1 | 2  | 8  | 4 | 3 | 2,66E-06 | 0,0029338410,0032420520,038332332 |
| 210006_at     | BC002571         | Hs.534400                                  | abhydrolase domain containing 14A                         | ABHD14A      | EG1 | 2  | 8  | 4 | 3 | 2,66E-06 | 0,0029338410,0032420520,038332332 |
| 211366_x_at   | U13698           | Hs.2490                                    | caspase 1, apoptosis-related cysteine peptidase (inter    | CASP1        | EG1 | 2  | 8  | 6 | 1 | 2,66E-06 | 0,0029338410,0032420520,038332332 |
| 212187_x_at   | NM_000954        | Hs.446429                                  | prostaglandin D2 synthase 21kDa (brain)                   | PTGDS        | EG1 | 6  | 4  | 5 | 2 | 2,66E-06 | 0,0029338410,0032420520,038332332 |
| 213023_at     | NM_007124        | Hs.133135                                  | utrophin (homologous to dystrophin)                       | UTRN         | EG1 | 8  | 2  | 4 | 3 | 2,66E-06 | 0,0029338410,0032420520,038332332 |
| 214877_at     | BE794663         | Hs.484844                                  | CDK5 regulatory subunit associated protein 1-like 1       | CDKAL1       | EG1 | 5  | 5  | 4 | 3 | 2,66E-06 | 0,0029338410,0032420520,038332332 |
| 219004_s_at   | NM_018944        | Hs.190518                                  | chromosome 21 open reading frame 45                       | C21orf45     | EG1 | 5  | 5  | 2 | 5 | 2,66E-06 | 0,0029338410,0032420520,038332332 |
| 219334_s_at   | NM_022837        | Hs.118183                                  |                                                           | FLJ22833     | EG1 | 5  | 5  | 3 | 4 | 2,66E-06 | 0,0029338410,0032420520,038332332 |
| 221843_s_at   | AA195017         | Hs.288274                                  |                                                           | KIAA1609     | EG1 | 2  | 8  | 2 | 5 | 2,66E-06 | 0,0029338410,0032420520,038332332 |
| 225762_x_at   | AL531683         | Hs.370699                                  |                                                           | LOC284801    | EG1 | 7  | 3  | 2 | 5 | 2,66E-06 | 0,0029338410,0032420520,038332332 |
| 225786_at     | AI440495         | Hs.411490, H                               | family with sequence similarity 36, member A              | FAM36A       | EG1 | 8  | 2  | 2 | 5 | 2,66E-06 | 0,0029338410,0032420520,038332332 |

|               |                  |                      |                                                                  |            |     |    |   |   |   |          |                                   |
|---------------|------------------|----------------------|------------------------------------------------------------------|------------|-----|----|---|---|---|----------|-----------------------------------|
| 227198_at     | AW085505         | Hs.444414            | AF4/FMR2 family, member 3                                        | AFF3       | EG1 | 5  | 5 | 1 | 6 | 2,66E-06 | 0,0029338410,0032420520,038332332 |
| 228561_at     | BF510563         | Hs.493361            | CDC37 cell division cycle 37 homolog ( <i>S. cerevisiae</i> )-li | CDC37L1    | EG1 | 9  | 1 | 4 | 3 | 2,66E-06 | 0,0029338410,0032420520,038332332 |
| 231069_at     | AI768895         |                      |                                                                  |            | EG1 | 6  | 4 | 5 | 2 | 2,66E-06 | 0,0029338410,0032420520,038332332 |
| 231152_at     | AW452971         |                      |                                                                  |            | EG1 | 9  | 1 | 3 | 4 | 2,66E-06 | 0,0029338410,0032420520,038332332 |
| 242868_at     | T70087           | Hs.468410            | endothelial PAS domain protein 1                                 | EPAS1      | EG1 | 6  | 4 | 6 | 1 | 2,66E-06 | 0,0029338410,0032420520,038332332 |
| 243829_at     | AW613053         | Hs.490366            | v-raf murine sarcoma viral oncogene homolog B1                   | BRAF       | EG1 | 9  | 1 | 6 | 1 | 2,66E-06 | 0,0029338410,0032420520,038332332 |
| 36711_at      | AL021977         | Hs.517617            | v-maf musculoaponeurotic fibrosarcoma oncogene ho                | MAFF       | EG1 | 7  | 3 | 4 | 3 | 2,66E-06 | 0,0029338410,0032420520,038332332 |
| AFFX-r2-Bs-ph | AFFX-R2-BS-PHE-M |                      |                                                                  |            | EG1 | 4  | 6 | 3 | 4 | 2,66E-06 | 0,0029338410,0032420520,038332332 |
| 1552302_at    | NM_145041        | Hs.446690            |                                                                  | MGC20235   | EG1 | 3  | 7 | 3 | 3 | 2,66E-06 | 0,0029338410,0147492140,111110101 |
| 1552703_s_at  | NM_052889        | Hs.348365            |                                                                  | COP1       | EG1 | 1  | 9 | 4 | 2 | 2,66E-06 | 0,0029338410,0147492140,111110101 |
| 1555892_s_at  | BF476087         | Hs.131417, Hs.193725 |                                                                  | LOC253039  | EG1 | 6  | 4 | 2 | 4 | 2,66E-06 | 0,0029338410,0147492140,111110101 |
| 202107_s_at   | NM_004526        | Hs.477481            | MCM2 minichromosome maintenance deficient 2, mit                 | MCM2       | EG1 | 4  | 6 | 2 | 4 | 2,66E-06 | 0,0029338410,0147492140,111110101 |
| 202295_s_at   | NM_004390        | Hs.148641            | cathepsin H                                                      | CTSH       | EG1 | 2  | 8 | 2 | 4 | 2,66E-06 | 0,0029338410,0147492140,111110101 |
| 206548_at     | NM_024880        | Hs.501080            |                                                                  | FLJ23556   | EG1 | 5  | 5 | 5 | 1 | 2,66E-06 | 0,0029338410,0147492140,111110101 |
| 207030_s_at   | NM_001321        | Hs.530904            | cysteine and glycine-rich protein 2                              | CSRP2      | EG1 | 4  | 6 | 3 | 3 | 2,66E-06 | 0,0029338410,0147492140,111110101 |
| 208881_x_at   | BC005247         | Hs.283652            | isopentenyl-diphosphate delta isomerase 1                        | IDI1       | EG1 | 9  | 1 | 6 | 0 | 2,66E-06 | 0,0029338410,0147492140,111110101 |
| 210589_s_at   | D13287           | Hs.282997, H         | glucosidase, beta, acid (includes glucosylceramidase)            | GBA        | EG1 | 1  | 9 | 4 | 2 | 2,66E-06 | 0,0029338410,0147492140,111110101 |
| 210845_s_at   | U08839           | Hs.466871            | plasminogen activator, urokinase receptor                        | PLAUR      | EG1 | 7  | 3 | 4 | 2 | 2,66E-06 | 0,0029338410,0147492140,111110101 |
| 211676_s_at   | AF056979         | Hs.520414            | interferon gamma receptor 1                                      | IFNGR1     | EG1 | 9  | 1 | 5 | 1 | 2,66E-06 | 0,0029338410,0147492140,111110101 |
| 213302_at     | AL044326         | Hs.88139             | phosphoribosylformylglycinamide synthase (FGAR a                 | PFAS       | EG1 | 5  | 5 | 3 | 3 | 2,66E-06 | 0,0029338410,0147492140,111110101 |
| 219854_at     | NM_021030        | Hs.466261            | zinc finger protein 14 (KOX 6)                                   | ZNF14      | EG1 | 7  | 3 | 4 | 2 | 2,66E-06 | 0,0029338410,0147492140,111110101 |
| 224558_s_at   | AI446756         | Hs.187199, H         | metastasis associated lung adenocarcinoma transcript             | MALAT1     | EG1 | 8  | 2 | 5 | 1 | 2,66E-06 | 0,0029338410,0147492140,111110101 |
| 224973_at     | AL078599         | Hs.10784             | family with sequence similarity 46, member A                     | FAM46A     | EG1 | 7  | 3 | 5 | 1 | 2,66E-06 | 0,0029338410,0147492140,111110101 |
| 225227_at     | AW294869         |                      |                                                                  |            | EG1 | 8  | 2 | 3 | 3 | 2,66E-06 | 0,0029338410,0147492140,111110101 |
| 227265_at     | AW135176         |                      |                                                                  |            | EG1 | 5  | 5 | 5 | 1 | 2,66E-06 | 0,0029338410,0147492140,111110101 |
| 234995_at     | AA668779         | Hs.477144            |                                                                  | LOC152185  | EG1 | 4  | 6 | 3 | 3 | 2,66E-06 | 0,0029338410,0147492140,111110101 |
| 240572_s_at   | BF436632         | Hs.396637            |                                                                  | LOC374443  | EG1 | 3  | 7 | 4 | 2 | 2,66E-06 | 0,0029338410,0147492140,111110101 |
| 1553984_s_at  | AF258562         | Hs.471873            | deoxythymidylate kinase (thymidylate kinase)                     | DTYMK      | EG1 | 4  | 6 | 2 | 3 | 2,66E-06 | 0,0029338410,0540847830,274766231 |
| 1562836_at    | AK021715         | Hs.408461            | DEAD (Asp-Glu-Ala-Asp) box polypeptide 6                         | DDX6       | EG1 | 8  | 2 | 2 | 3 | 2,66E-06 | 0,0029338410,0540847830,274766231 |
| 1563469_at    | AL832681         | Hs.535297            | AT rich interactive domain 5B (MRF1-like)                        | ARID5B     | EG1 | 2  | 8 | 2 | 3 | 2,66E-06 | 0,0029338410,0540847830,274766231 |
| 202687_s_at   | U57059           | Hs.478275            | tumor necrosis factor (ligand) superfamily, member 1             | TNFSF10    | EG1 | 2  | 8 | 1 | 4 | 2,66E-06 | 0,0029338410,0540847830,274766231 |
| 204170_s_at   | NM_001827        | Hs.83758             | CDC28 protein kinase regulatory subunit 2                        | CKS2       | EG1 | 9  | 1 | 2 | 3 | 2,66E-06 | 0,0029338410,0540847830,274766231 |
| 212514_x_at   | R60068           | Hs.380774            | DEAD (Asp-Glu-Ala-Asp) box polypeptide 3, X-linked               | DDX3X      | EG1 | 10 | 0 | 3 | 2 | 2,66E-06 | 0,0029338410,0540847830,274766231 |
| 226444_at     | AI700476         | Hs.413434            | solute carrier family 39 (zinc transporter), member 10           | SLC39A10   | EG1 | 8  | 2 | 5 | 0 | 2,66E-06 | 0,0029338410,0540847830,274766231 |
| 228742_at     | AA745978         |                      |                                                                  |            | EG1 | 2  | 8 | 1 | 4 | 2,66E-06 | 0,0029338410,0540847830,274766231 |
| 229735_s_at   | W15435           | Hs.523442            | NIPA-like domain containing 3                                    | NPAL3      | EG1 | 4  | 6 | 1 | 4 | 2,66E-06 | 0,0029338410,0540847830,274766231 |
| 230036_at     | BE669858         | Hs.489118            | sterile alpha motif domain containing 9-like                     | SAMD9L     | EG1 | 3  | 7 | 1 | 4 | 2,66E-06 | 0,0029338410,0540847830,274766231 |
| 231269_at     | AU153330         | Hs.486031            |                                                                  | DJ467N11.1 | EG1 | 9  | 1 | 4 | 1 | 2,66E-06 | 0,0029338410,0540847830,274766231 |
| 232978_at     | AF339810         | Hs.125715            | muscleblind-like 2 ( <i>Drosophila</i> )                         | MBNL2      | EG1 | 7  | 3 | 5 | 0 | 2,66E-06 | 0,0029338410,0540847830,274766231 |
| 233849_s_at   | AK023014         | Hs.525287            | Rho GTPase activating protein 5                                  | ARHGAP5    | EG1 | 8  | 2 | 0 | 5 | 2,66E-06 | 0,0029338410,0540847830,274766231 |
| 236974_at     | AA808018         | Hs.518827            | cyclin I                                                         | CCNI       | EG1 | 8  | 2 | 5 | 0 | 2,66E-06 | 0,0029338410,0540847830,274766231 |
| 241627_x_at   | AI640434         | Hs.35125             |                                                                  | FLJ10357   | EG1 | 6  | 4 | 3 | 2 | 2,66E-06 | 0,0029338410,0540847830,274766231 |
| 1557813_at    | BF724621         | Hs.102735            | single-stranded DNA binding protein 2                            | SSBP2      | EG1 | 8  | 2 | 3 | 1 | 2,66E-06 | 0,0029338410,1581335050,559565828 |
| 205449_at     | NM_013299        | Hs.23642             | SAC3 domain containing 1                                         | SAC3D1     | EG1 | 4  | 6 | 1 | 3 | 2,66E-06 | 0,0029338410,1581335050,559565828 |
| 214787_at     | BE268538         | Hs.513817            | c-myc promoter binding protein                                   | MYCPBP     | EG1 | 10 | 0 | 1 | 3 | 2,66E-06 | 0,0029338410,1581335050,559565828 |

|              |           |            |                                                           |           |     |    |   |   |   |          |                                   |
|--------------|-----------|------------|-----------------------------------------------------------|-----------|-----|----|---|---|---|----------|-----------------------------------|
| 221428_s_at  | NM_030921 | Hs.438970  | transducin (beta)-like 1X-linked receptor 1               | TBL1XR1   | EG1 | 7  | 3 | 1 | 3 | 2,66E-06 | 0,0029338410,1581335050,559565828 |
| 221763_at    | AI694023  | Hs.413416, | H jumonji domain containing 1C                            | JMJD1C    | EG1 | 9  | 1 | 2 | 2 | 2,66E-06 | 0,0029338410,1581335050,559565828 |
| 244811_at    | AI561173  | Hs.511817  | pleckstrin homology domain interacting protein            | PHIP      | EG1 | 9  | 1 | 2 | 2 | 2,66E-06 | 0,0029338410,1581335050,559565828 |
| 1557522_x_at | AA653638  | Hs.472651  | bladder cancer associated protein                         | BLCAP     | EG1 | 7  | 3 | 1 | 2 | 2,66E-06 | 0,0029338410,3636349230,911710613 |
| 204868_at    | NM_001545 | Hs.407955  | immature colon carcinoma transcript 1                     | ICT1      | EG1 | 3  | 7 | 1 | 2 | 2,66E-06 | 0,0029338410,3636349230,911710613 |
| 211752_s_at  | BC005954  | Hs.211914  | NADH dehydrogenase (ubiquinone) Fe-S protein 7, 20        | NDUFS7    | EG1 | 2  | 8 | 1 | 2 | 2,66E-06 | 0,0029338410,3636349230,911710613 |
| 212037_at    | BF508848  | Hs.409965  | pinin, desmosome associated protein                       | PNN       | EG1 | 10 | 0 | 1 | 2 | 2,66E-06 | 0,0029338410,3636349230,911710613 |
| 218166_s_at  | NM_016578 | Hs.420229  | hepatitis B virus x associated protein                    | HBXAP     | EG1 | 9  | 1 | 2 | 1 | 2,66E-06 | 0,0029338410,3636349230,911710613 |
| 219470_x_at  | NM_019084 | Hs.281348  | cyclin J                                                  | CCNJ      | EG1 | 9  | 1 | 3 | 0 | 2,66E-06 | 0,0029338410,3636349230,911710613 |
| 228758_at    | AW264036  | Hs.478589  |                                                           | LOC389185 | EG1 | 7  | 3 | 3 | 0 | 2,66E-06 | 0,0029338410,3636349230,911710613 |
| 232382_s_at  | BE150929  | Hs.308480  |                                                           | LOC115294 | EG1 | 4  | 6 | 3 | 0 | 2,66E-06 | 0,0029338410,3636349230,911710613 |
| 234411_x_at  | U94903    | Hs.502328  | CD44 antigen (homing function and Indian blood grou       | CD44      | EG1 | 9  | 1 | 2 | 0 | 2,66E-06 | 0,0029338410,6490161710,911710613 |
| 238465_at    | AI265933  | Hs.85950   |                                                           | MGC33648  | EG1 | 5  | 5 | 1 | 1 | 2,66E-06 | 0,0029338410,6490161710,911710613 |
| 239493_at    | AI984074  | Hs.421257  | ribosomal protein L7                                      | RPL7      | EG1 | 9  | 1 | 1 | 1 | 2,66E-06 | 0,0029338410,6490161710,911710613 |
| 234881_at    | L33988    |            |                                                           |           | EG1 | 3  | 7 | 1 | 0 | 2,66E-06 | 0,0029338410,8976818490,911710613 |
| 238456_at    | AI567893  |            |                                                           |           | EG1 | 9  | 1 | 0 | 1 | 2,66E-06 | 0,0029338410,8976818490,911710613 |
| 1558401_at   | AW953994  |            |                                                           |           | EG1 | 5  | 4 | 4 | 4 | 2,72E-05 | 0,0029338410,0005786180,011359908 |
| 1569157_s_at | BC037359  | Hs.546512  |                                                           | LOC162993 | EG1 | 2  | 7 | 2 | 6 | 2,72E-05 | 0,0029338410,0005786180,011359908 |
| 201136_at    | NM_002668 | Hs.77422   | proteolipid protein 2 (colonic epithelium-enriched)       | PLP2      | EG1 | 2  | 7 | 0 | 8 | 2,72E-05 | 0,0029338410,0005786180,011359908 |
| 201294_s_at  | N24643    | Hs.446017  | WD repeat and SOCS box-containing 1                       | WSB1      | EG1 | 5  | 4 | 4 | 4 | 2,72E-05 | 0,0029338410,0005786180,011359908 |
| 203022_at    | NM_006397 | Hs.532851  | ribonuclease H2, large subunit                            | RNASEH2A  | EG1 | 4  | 5 | 4 | 4 | 2,72E-05 | 0,0029338410,0005786180,011359908 |
| 206632_s_at  | NM_004900 | Hs.226307  | apolipoprotein B mRNA editing enzyme, catalytic poly      | APOBEC3B  | EG1 | 5  | 4 | 2 | 6 | 2,72E-05 | 0,0029338410,0005786180,011359908 |
| 208116_s_at  | NM_005907 | Hs.102788  | mannosidase, alpha, class 1A, member 1                    | MAN1A1    | EG1 | 7  | 2 | 5 | 3 | 2,72E-05 | 0,0029338410,0005786180,011359908 |
| 208733_at    | AW301641  | Hs.369017  | RAB2, member RAS oncogene family                          | RAB2      | EG1 | 4  | 5 | 4 | 4 | 2,72E-05 | 0,0029338410,0005786180,011359908 |
| 209164_s_at  | BC002976  | Hs.355264  | cytochrome b-561                                          | CYB561    | EG1 | 2  | 7 | 3 | 5 | 2,72E-05 | 0,0029338410,0005786180,011359908 |
| 210172_at    | D26121    | Hs.502829  | splicing factor 1                                         | SF1       | EG1 | 4  | 5 | 4 | 4 | 2,72E-05 | 0,0029338410,0005786180,011359908 |
| 212583_at    | AB011132  | Hs.510958  | aquarius homolog (mouse)                                  | AQR       | EG1 | 4  | 5 | 7 | 1 | 2,72E-05 | 0,0029338410,0005786180,011359908 |
| 212847_at    | AL036840  | Hs.269099  | far upstream element (FUSE) binding protein 1             | FUBP1     | EG1 | 8  | 1 | 5 | 3 | 2,72E-05 | 0,0029338410,0005786180,011359908 |
| 212907_at    | AI972416  | Hs.519469  | solute carrier family 30 (zinc transporter), member 1     | SLC30A1   | EG1 | 9  | 0 | 8 | 0 | 2,72E-05 | 0,0029338410,0005786180,011359908 |
| 213182_x_at  | R78668    | Hs.106070  | cyclin-dependent kinase inhibitor 1C (p57, Kip2)          | CDKN1C    | EG1 | 3  | 6 | 4 | 4 | 2,72E-05 | 0,0029338410,0005786180,011359908 |
| 219215_s_at  | NM_017767 | Hs.521934  | solute carrier family 39 (zinc transporter), member 4     | SLC39A4   | EG1 | 2  | 7 | 4 | 4 | 2,72E-05 | 0,0029338410,0005786180,011359908 |
| 221555_x_at  | AU145941  | Hs.40582   | CDC14 cell division cycle 14 homolog B (S. cerevisiae)    | CDC14B    | EG1 | 3  | 6 | 4 | 4 | 2,72E-05 | 0,0029338410,0005786180,011359908 |
| 222316_at    | AW973253  | Hs.292689  |                                                           | VDP       | EG1 | 7  | 2 | 6 | 2 | 2,72E-05 | 0,0029338410,0005786180,011359908 |
| 222662_at    | W60806    | Hs.458513  |                                                           | LOC286044 | EG1 | 6  | 3 | 6 | 2 | 2,72E-05 | 0,0029338410,0005786180,011359908 |
| 223103_at    | AF151810  | Hs.188606  | START domain containing 10                                | STARD10   | EG1 | 3  | 6 | 0 | 8 | 2,72E-05 | 0,0029338410,0005786180,011359908 |
| 225834_at    | AL135396  | Hs.534958  |                                                           | LOC440687 | EG1 | 4  | 5 | 3 | 5 | 2,72E-05 | 0,0029338410,0005786180,011359908 |
| 226682_at    | AW006185  | Hs.512943  |                                                           | LOC283666 | EG1 | 4  | 5 | 5 | 3 | 2,72E-05 | 0,0029338410,0005786180,011359908 |
| 228153_at    | AI953847  | Hs.148741  | IBR domain containing 2                                   | IBRDC2    | EG1 | 4  | 5 | 5 | 3 | 2,72E-05 | 0,0029338410,0005786180,011359908 |
| 229256_at    | AV724329  | Hs.26612   | phosphoglucomutase 2-like 1                               | PGM2L1    | EG1 | 6  | 3 | 3 | 5 | 2,72E-05 | 0,0029338410,0005786180,011359908 |
| 232573_at    | AL389956  | Hs.403933  | F-box protein 32                                          | FBXO32    | EG1 | 7  | 2 | 6 | 2 | 2,72E-05 | 0,0029338410,0005786180,011359908 |
| 235440_at    | BE780878  | Hs.268668  |                                                           | FLJ39441  | EG1 | 8  | 1 | 6 | 2 | 2,72E-05 | 0,0029338410,0005786180,011359908 |
| 235592_at    | AW960145  | Hs.192221, | H elongation factor, RNA polymerase II, 2                 | ELL2      | EG1 | 6  | 3 | 4 | 4 | 2,72E-05 | 0,0029338410,0005786180,011359908 |
| 238909_at    | BF126155  | Hs.143873  | S100 calcium binding protein A10 (annexin II ligand, ca   | S100A10   | EG1 | 1  | 8 | 6 | 2 | 2,72E-05 | 0,0029338410,0005786180,011359908 |
| 242691_at    | AA829017  |            |                                                           |           | EG1 | 4  | 5 | 3 | 5 | 2,72E-05 | 0,0029338410,0005786180,011359908 |
| 244353_s_at  | AI675682  | Hs.486508  | solute carrier family 2 (facilitated glucose transporter) | SLC2A12   | EG1 | 4  | 5 | 1 | 7 | 2,72E-05 | 0,0029338410,0005786180,011359908 |

|               |                  |                      |                                                           |           |     |   |   |   |   |          |                                   |
|---------------|------------------|----------------------|-----------------------------------------------------------|-----------|-----|---|---|---|---|----------|-----------------------------------|
| AFFX-r2-Bs-ph | AFFX-R2-BS-PHE-3 |                      |                                                           |           | EG1 | 5 | 4 | 5 | 3 | 2,72E-05 | 0,0029338410,0005786180,011359908 |
| 1558102_at    | AK055438         | Hs.513094            | transmembrane 6 superfamily member 1                      | TM6SF1    | EG1 | 5 | 4 | 5 | 2 | 2,72E-05 | 0,0029338410,0032420520,038332332 |
| 1566901_at    | AL832409         | Hs.373550            | TGFB-induced factor (TALE family homeobox)                | TGIF      | EG1 | 8 | 1 | 7 | 0 | 2,72E-05 | 0,0029338410,0032420520,038332332 |
| 201626_at     | BG292233         | Hs.520819            | insulin induced gene 1                                    | INSIG1    | EG1 | 7 | 2 | 4 | 3 | 2,72E-05 | 0,0029338410,0032420520,038332332 |
| 201627_s_at   | NM_005542        | Hs.520819            | insulin induced gene 1                                    | INSIG1    | EG1 | 7 | 2 | 4 | 3 | 2,72E-05 | 0,0029338410,0032420520,038332332 |
| 201702_s_at   | AI492873         | Hs.106019            | protein phosphatase 1, regulatory subunit 10              | PPP1R10   | EG1 | 4 | 5 | 2 | 5 | 2,72E-05 | 0,0029338410,0032420520,038332332 |
| 202708_s_at   | NM_003528        | Hs.2178              | histone 2, H2be                                           | HIST2H2BE | EG1 | 8 | 1 | 4 | 3 | 2,72E-05 | 0,0029338410,0032420520,038332332 |
| 202869_at     | NM_016816        | Hs.524760            | 2',5'-oligoadenylate synthetase 1, 40/46kDa               | OAS1      | EG1 | 3 | 6 | 6 | 1 | 2,72E-05 | 0,0029338410,0032420520,038332332 |
| 202979_s_at   | NM_021212        | Hs.535319            |                                                           | ZF        | EG1 | 8 | 1 | 5 | 2 | 2,72E-05 | 0,0029338410,0032420520,038332332 |
| 203828_s_at   | NM_004221        | Hs.943               | interleukin 32                                            | IL32      | EG1 | 2 | 7 | 1 | 6 | 2,72E-05 | 0,0029338410,0032420520,038332332 |
| 204502_at     | NM_015474        | Hs.472630            | SAM domain and HD domain 1                                | SAMHD1    | EG1 | 5 | 4 | 2 | 5 | 2,72E-05 | 0,0029338410,0032420520,038332332 |
| 205681_at     | NM_004049        | Hs.227817            | BCL2-related protein A1                                   | BCL2A1    | EG1 | 5 | 4 | 4 | 3 | 2,72E-05 | 0,0029338410,0032420520,038332332 |
| 205798_at     | NM_002185        | Hs.362807            | interleukin 7 receptor                                    | IL7R      | EG1 | 4 | 5 | 2 | 5 | 2,72E-05 | 0,0029338410,0032420520,038332332 |
| 208859_s_at   | AI650257         | Hs.533526            | H alpha thalassemia/mental retardation syndrome X-lin     | ATRX      | EG1 | 2 | 7 | 5 | 2 | 2,72E-05 | 0,0029338410,0032420520,038332332 |
| 209417_s_at   | BC001356         | Hs.50842             | interferon-induced protein 35                             | IFI35     | EG1 | 2 | 7 | 3 | 4 | 2,72E-05 | 0,0029338410,0032420520,038332332 |
| 209512_at     | BC004331         | Hs.59486             | hydroxysteroid dehydrogenase like 2                       | HSDL2     | EG1 | 5 | 4 | 4 | 3 | 2,72E-05 | 0,0029338410,0032420520,038332332 |
| 209681_at     | AF153330         | Hs.30246             | solute carrier family 19 (thiamine transporter), memb     | SLC19A2   | EG1 | 9 | 0 | 4 | 3 | 2,72E-05 | 0,0029338410,0032420520,038332332 |
| 210778_s_at   | BC002713         | Hs.102402            | MAX dimerization protein 4                                | MXD4      | EG1 | 3 | 6 | 5 | 2 | 2,72E-05 | 0,0029338410,0032420520,038332332 |
| 212944_at     | AK024896         | Hs.302742            | mitochondrial ribosomal protein S6                        | MRPS6     | EG1 | 5 | 4 | 7 | 0 | 2,72E-05 | 0,0029338410,0032420520,038332332 |
| 213372_at     | AW173157         | Hs.556026            | progesterin and adipoQ receptor family member III         | PAQR3     | EG1 | 8 | 1 | 6 | 1 | 2,72E-05 | 0,0029338410,0032420520,038332332 |
| 216766_at     | AK025152         | Hs.97432             | protein kinase C, epsilon                                 | PRKCE     | EG1 | 5 | 4 | 4 | 3 | 2,72E-05 | 0,0029338410,0032420520,038332332 |
| 218585_s_at   | NM_016448        | Hs.126774            | denticleless homolog (Drosophila)                         | DTL       | EG1 | 5 | 4 | 4 | 3 | 2,72E-05 | 0,0029338410,0032420520,038332332 |
| 218918_at     | NM_020379        | Hs.197043            | mannosidase, alpha, class 1C, member 1                    | MAN1C1    | EG1 | 3 | 6 | 2 | 5 | 2,72E-05 | 0,0029338410,0032420520,038332332 |
| 219622_at     | NM_017817        | Hs.508720            | RAB20, member RAS oncogene family                         | RAB20     | EG1 | 4 | 5 | 0 | 7 | 2,72E-05 | 0,0029338410,0032420520,038332332 |
| 219978_s_at   | NM_018454        | Hs.511093            | nucleolar and spindle associated protein 1                | NUSAP1    | EG1 | 6 | 3 | 2 | 5 | 2,72E-05 | 0,0029338410,0032420520,038332332 |
| 220941_s_at   | NM_017447        | Hs.293811            | chromosome 21 open reading frame 91                       | C21orf91  | EG1 | 6 | 3 | 6 | 1 | 2,72E-05 | 0,0029338410,0032420520,038332332 |
| 221276_s_at   | NM_030786        | Hs.16003             | syncoilin, intermediate filament 1                        | SYNC1     | EG1 | 5 | 4 | 4 | 3 | 2,72E-05 | 0,0029338410,0032420520,038332332 |
| 221985_at     | AW006750         | Hs.407709            | kelch-like 24 (Drosophila)                                | KLHL24    | EG1 | 7 | 2 | 3 | 4 | 2,72E-05 | 0,0029338410,0032420520,038332332 |
| 222592_s_at   | AW173691         | Hs.11638             | acyl-CoA synthetase long-chain family member 5            | ACSL5     | EG1 | 1 | 8 | 3 | 4 | 2,72E-05 | 0,0029338410,0032420520,038332332 |
| 225107_at     | AI963008         | Hs.535028            |                                                           | LOC442518 | EG1 | 8 | 1 | 3 | 4 | 2,72E-05 | 0,0029338410,0032420520,038332332 |
| 225876_at     | T84558           | Hs.523442            | NIPA-like domain containing 3                             | NPAL3     | EG1 | 2 | 7 | 3 | 4 | 2,72E-05 | 0,0029338410,0032420520,038332332 |
| 226158_at     | AL120021         | Hs.407709            | kelch-like 24 (Drosophila)                                | KLHL24    | EG1 | 7 | 2 | 3 | 4 | 2,72E-05 | 0,0029338410,0032420520,038332332 |
| 226390_at     | AA628398         | Hs.93842             | START domain containing 4, sterol regulated               | STARD4    | EG1 | 7 | 2 | 6 | 1 | 2,72E-05 | 0,0029338410,0032420520,038332332 |
| 226542_at     | AI300571         |                      |                                                           |           | EG1 | 5 | 4 | 1 | 6 | 2,72E-05 | 0,0029338410,0032420520,038332332 |
| 227040_at     | AI655763         | Hs.507783            |                                                           | LOC387921 | EG1 | 4 | 5 | 2 | 5 | 2,72E-05 | 0,0029338410,0032420520,038332332 |
| 228160_at     | AI433706         | Hs.552607, Hs.553799 |                                                           | LOC400642 | EG1 | 5 | 4 | 3 | 4 | 2,72E-05 | 0,0029338410,0032420520,038332332 |
| 228468_at     | BF108964         | Hs.276905            | microtubule associated serine/threonine kinase-like       | MASTL     | EG1 | 8 | 1 | 2 | 5 | 2,72E-05 | 0,0029338410,0032420520,038332332 |
| 228674_s_at   | AA524507         | Hs.432438            | echinoderm microtubule associated protein like 4          | EML4      | EG1 | 4 | 5 | 2 | 5 | 2,72E-05 | 0,0029338410,0032420520,038332332 |
| 229574_at     | AI268231         | Hs.445652            |                                                           | TRA2A     | EG1 | 5 | 4 | 3 | 4 | 2,72E-05 | 0,0029338410,0032420520,038332332 |
| 229685_at     | AI743207         | Hs.518611            | TBC1 domain family, member 14                             | TBC1D14   | EG1 | 2 | 7 | 1 | 6 | 2,72E-05 | 0,0029338410,0032420520,038332332 |
| 230082_at     | AW137053         | Hs.475319            | leucine rich repeat (in FLII) interacting protein 2       | LRRFIP2   | EG1 | 8 | 1 | 7 | 0 | 2,72E-05 | 0,0029338410,0032420520,038332332 |
| 234973_at     | BG325630         | Hs.195155            | solute carrier family 38, member 5                        | SLC38A5   | EG1 | 3 | 6 | 5 | 2 | 2,72E-05 | 0,0029338410,0032420520,038332332 |
| 235190_at     | BF591288         | Hs.282410            | H calmodulin 2 (phosphorylase kinase, delta)              | CALM2     | EG1 | 8 | 1 | 7 | 0 | 2,72E-05 | 0,0029338410,0032420520,038332332 |
| 236072_at     | N64578           | Hs.435948            | ATPase family, AAA domain containing 1                    | ATAD1     | EG1 | 5 | 4 | 4 | 3 | 2,72E-05 | 0,0029338410,0032420520,038332332 |
| 236989_at     | AW293012         | Hs.405590            | eukaryotic translation initiation factor 3, subunit 6 48k | EIF3S6    | EG1 | 7 | 2 | 3 | 4 | 2,72E-05 | 0,0029338410,0032420520,038332332 |

|              |           |           |                                                         |           |     |   |   |   |   |          |                                   |
|--------------|-----------|-----------|---------------------------------------------------------|-----------|-----|---|---|---|---|----------|-----------------------------------|
| 238452_at    | AI393356  | Hs.517422 | Fc receptor-like and mucin-like 2                       | FCRLM2    | EG1 | 2 | 7 | 4 | 3 | 2,72E-05 | 0,0029338410,0032420520,038332332 |
| 238781_at    | AI859076  | Hs.519347 | splicing factor, arginine/serine-rich 12                | SFRS12    | EG1 | 7 | 2 | 4 | 3 | 2,72E-05 | 0,0029338410,0032420520,038332332 |
| 242836_at    | AI800470  |           |                                                         |           | EG1 | 5 | 4 | 4 | 3 | 2,72E-05 | 0,0029338410,0032420520,038332332 |
| 243016_at    | AW271958  | Hs.369762 | thymidylate synthetase                                  | TYMS      | EG1 | 7 | 2 | 4 | 3 | 2,72E-05 | 0,0029338410,0032420520,038332332 |
| 1565703_at   | AL832789  | Hs.75862  | SMAD, mothers against DPP homolog 4 (Drosophila)        | SMAD4     | EG1 | 6 | 3 | 4 | 2 | 2,72E-05 | 0,0029338410,0147492140,111110101 |
| 1565951_s_at | AJ293392  | Hs.170129 | choroideremia-like (Rab escort protein 2)               | CHML      | EG1 | 9 | 0 | 3 | 3 | 2,72E-05 | 0,0029338410,0147492140,111110101 |
| 201755_at    | NM_006739 | Hs.517582 | MCM5 minichromosome maintenance deficient 5, cell       | MCM5      | EG1 | 3 | 6 | 2 | 4 | 2,72E-05 | 0,0029338410,0147492140,111110101 |
| 202464_s_at  | NM_004566 | Hs.195471 | 6-phosphofructo-2-kinase/fructose-2,6-biphosphatas      | PFKFB3    | EG1 | 4 | 5 | 3 | 3 | 2,72E-05 | 0,0029338410,0147492140,111110101 |
| 202779_s_at  | NM_014501 | Hs.396393 | ubiquitin-conjugating enzyme E2S                        | UBE2S     | EG1 | 7 | 2 | 3 | 3 | 2,72E-05 | 0,0029338410,0147492140,111110101 |
| 203836_s_at  | D84476    | Hs.186486 | mitogen-activated protein kinase kinase kinase 5        | MAP3K5    | EG1 | 4 | 5 | 4 | 2 | 2,72E-05 | 0,0029338410,0147492140,111110101 |
| 204194_at    | NM_001186 | Hs.154276 | BTB and CNC homology 1, basic leucine zipper transcri   | BACH1     | EG1 | 7 | 2 | 3 | 3 | 2,72E-05 | 0,0029338410,0147492140,111110101 |
| 205139_s_at  | NM_005715 | Hs.309250 | uronyl-2-sulfotransferase                               | UST       | EG1 | 7 | 2 | 1 | 5 | 2,72E-05 | 0,0029338410,0147492140,111110101 |
| 205436_s_at  | NM_002105 | Hs.477879 | H2A histone family, member X                            | H2AFX     | EG1 | 7 | 2 | 3 | 3 | 2,72E-05 | 0,0029338410,0147492140,111110101 |
| 208744_x_at  | BG403660  | Hs.36927  | heat shock 105kDa/110kDa protein 1                      | HSPH1     | EG1 | 9 | 0 | 4 | 2 | 2,72E-05 | 0,0029338410,0147492140,111110101 |
| 209163_at    | AL514271  | Hs.355264 | cytochrome b-561                                        | CYB561    | EG1 | 4 | 5 | 3 | 3 | 2,72E-05 | 0,0029338410,0147492140,111110101 |
| 209421_at    | U04045    | Hs.156519 | mutS homolog 2, colon cancer, nonpolyposis type 1 (E.   | MSH2      | EG1 | 3 | 6 | 2 | 4 | 2,72E-05 | 0,0029338410,0147492140,111110101 |
| 209840_s_at  | AI221950  | Hs.3781   | leucine rich repeat neuronal 3                          | LRRN3     | EG1 | 3 | 6 | 1 | 5 | 2,72E-05 | 0,0029338410,0147492140,111110101 |
| 210424_s_at  | AF163441  | Hs.182982 | H golgi autoantigen, golgin subfamily a, 8A             | GOLGA8A   | EG1 | 6 | 3 | 5 | 1 | 2,72E-05 | 0,0029338410,0147492140,111110101 |
| 210793_s_at  | U41815    | Hs.524750 | nucleoporin 98kDa                                       | NUP98     | EG1 | 7 | 2 | 5 | 1 | 2,72E-05 | 0,0029338410,0147492140,111110101 |
| 211323_s_at  | L38019    | Hs.374613 | inositol 1,4,5-triphosphate receptor, type 1            | ITPR1     | EG1 | 7 | 2 | 2 | 4 | 2,72E-05 | 0,0029338410,0147492140,111110101 |
| 211748_x_at  | BC005939  | Hs.446429 | prostaglandin D2 synthase 21kDa (brain)                 | PTGDS     | EG1 | 4 | 5 | 4 | 2 | 2,72E-05 | 0,0029338410,0147492140,111110101 |
| 212746_s_at  | AA126789  | Hs.408293 | H KIAA0470                                              | KIAA0470  | EG1 | 6 | 3 | 2 | 4 | 2,72E-05 | 0,0029338410,0147492140,111110101 |
| 212890_at    | BF663461  | Hs.352240 |                                                         | MGC15523  | EG1 | 0 | 9 | 4 | 2 | 2,72E-05 | 0,0029338410,0147492140,111110101 |
| 215011_at    | AJ006835  | Hs.469723 | RNA, U17D small nucleolar                               | RNU17D    | EG1 | 8 | 1 | 2 | 4 | 2,72E-05 | 0,0029338410,0147492140,111110101 |
| 217949_s_at  | NM_024006 | Hs.324844 | vitamin K epoxide reductase complex, subunit 1          | VKORC1    | EG1 | 0 | 9 | 4 | 2 | 2,72E-05 | 0,0029338410,0147492140,111110101 |
| 218317_x_at  | NM_024044 | Hs.460558 | GIY-YIG domain containing 2                             | GIYD2     | EG1 | 1 | 8 | 1 | 5 | 2,72E-05 | 0,0029338410,0147492140,111110101 |
| 220148_at    | NM_022568 | Hs.486520 | aldehyde dehydrogenase 8 family, member A1              | ALDH8A1   | EG1 | 7 | 2 | 1 | 5 | 2,72E-05 | 0,0029338410,0147492140,111110101 |
| 222429_at    | AF077353  | Hs.436500 | drebrin-like                                            | DBNL      | EG1 | 2 | 7 | 2 | 4 | 2,72E-05 | 0,0029338410,0147492140,111110101 |
| 223276_at    | AF313413  | Hs.29444  |                                                         | NID67     | EG1 | 2 | 7 | 5 | 1 | 2,72E-05 | 0,0029338410,0147492140,111110101 |
| 223407_at    | AL136786  | Hs.307084 | chromosome 16 open reading frame 48                     | C16orf48  | EG1 | 1 | 8 | 0 | 6 | 2,72E-05 | 0,0029338410,0147492140,111110101 |
| 223577_x_at  | AA827878  | Hs.187199 | H metastasis associated lung adenocarcinoma transcript  | MALAT1    | EG1 | 6 | 3 | 3 | 3 | 2,72E-05 | 0,0029338410,0147492140,111110101 |
| 225541_at    | BE274422  | Hs.380933 | ribosomal protein L22-like 1                            | RPL22L1   | EG1 | 5 | 4 | 3 | 3 | 2,72E-05 | 0,0029338410,0147492140,111110101 |
| 225899_x_at  | AL040396  | Hs.484396 |                                                         | LOC440395 | EG1 | 5 | 4 | 2 | 4 | 2,72E-05 | 0,0029338410,0147492140,111110101 |
| 226922_at    | BF215302  | Hs.199561 | RAN binding protein 2                                   | RANBP2    | EG1 | 8 | 1 | 5 | 1 | 2,72E-05 | 0,0029338410,0147492140,111110101 |
| 226923_at    | AW205790  | Hs.302287 | sec1 family domain containing 2                         | SCFD2     | EG1 | 3 | 6 | 3 | 3 | 2,72E-05 | 0,0029338410,0147492140,111110101 |
| 228193_s_at  | AI744499  | Hs.507866 |                                                         | RGC32     | EG1 | 7 | 2 | 0 | 6 | 2,72E-05 | 0,0029338410,0147492140,111110101 |
| 228570_at    | BF510581  | Hs.271272 | H BTB (POZ) domain containing 11                        | BTBD11    | EG1 | 5 | 4 | 1 | 5 | 2,72E-05 | 0,0029338410,0147492140,111110101 |
| 229075_at    | AI754871  |           |                                                         |           | EG1 | 6 | 3 | 2 | 4 | 2,72E-05 | 0,0029338410,0147492140,111110101 |
| 229393_at    | AA088346  | Hs.486466 | l(3)mbt-like 3 (Drosophila)                             | L3MBTL3   | EG1 | 7 | 2 | 2 | 4 | 2,72E-05 | 0,0029338410,0147492140,111110101 |
| 233292_s_at  | AK024189  | Hs.434219 | ankyrin repeat and KH domain containing 1               | ANKHD1    | EG1 | 8 | 1 | 4 | 2 | 2,72E-05 | 0,0029338410,0147492140,111110101 |
| 235787_at    | T65394    | Hs.493361 | CDC37 cell division cycle 37 homolog (S. cerevisiae)-li | CDC37L1   | EG1 | 7 | 2 | 3 | 3 | 2,72E-05 | 0,0029338410,0147492140,111110101 |
| 235926_at    | AI312527  | Hs.7101   | anaphase promoting complex subunit 5                    | ANAPC5    | EG1 | 5 | 4 | 5 | 1 | 2,72E-05 | 0,0029338410,0147492140,111110101 |
| 236703_at    | BF114733  |           |                                                         |           | EG1 | 5 | 4 | 4 | 2 | 2,72E-05 | 0,0029338410,0147492140,111110101 |
| 239228_at    | AI298887  | Hs.446484 | H casein kinase 2, alpha 1 polypeptide                  | CSNK2A1   | EG1 | 4 | 5 | 5 | 1 | 2,72E-05 | 0,0029338410,0147492140,111110101 |
| 242110_at    | AV735587  | Hs.525287 | Rho GTPase activating protein 5                         | ARHGAP5   | EG1 | 6 | 3 | 4 | 2 | 2,72E-05 | 0,0029338410,0147492140,111110101 |

|              |           |                      |                                                         |           |     |   |   |   |   |          |                                   |
|--------------|-----------|----------------------|---------------------------------------------------------|-----------|-----|---|---|---|---|----------|-----------------------------------|
| 244054_at    | AI760298  | Hs.445725            | SKI-like                                                | SKIL      | EG1 | 7 | 2 | 4 | 2 | 2,72E-05 | 0,0029338410,0147492140,111110101 |
| 1555247_a_at | AF394782  | Hs.483329            | Rap guanine nucleotide exchange factor (GEF) 6          | RAPGEF6   | EG1 | 6 | 3 | 0 | 5 | 2,72E-05 | 0,0029338410,0540847830,274766231 |
| 1558837_a_at | BQ024490  |                      |                                                         |           | EG1 | 3 | 6 | 4 | 1 | 2,72E-05 | 0,0029338410,0540847830,274766231 |
| 1559401_a_at | BI052176  | Hs.170498            | zinc finger protein 609                                 | ZNF609    | EG1 | 4 | 5 | 1 | 4 | 2,72E-05 | 0,0029338410,0540847830,274766231 |
| 1570021_at   | BC036226  | Hs.434961, Hs.558004 |                                                         | LOC360030 | EG1 | 1 | 8 | 4 | 1 | 2,72E-05 | 0,0029338410,0540847830,274766231 |
| 200832_s_at  | AB032261  | Hs.368641            | stearoyl-CoA desaturase (delta-9-desaturase)            | SCD       | EG1 | 6 | 3 | 1 | 4 | 2,72E-05 | 0,0029338410,0540847830,274766231 |
| 201435_s_at  | AW268640  | Hs.249718            | eukaryotic translation initiation factor 4E             | EIF4E     | EG1 | 7 | 2 | 3 | 2 | 2,72E-05 | 0,0029338410,0540847830,274766231 |
| 201601_x_at  | NM_003641 | Hs.458414            | interferon induced transmembrane protein 1 (9-27)       | IFITM1    | EG1 | 1 | 8 | 3 | 2 | 2,72E-05 | 0,0029338410,0540847830,274766231 |
| 201673_s_at  | NM_002103 | Hs.386225            | glycogen synthase 1 (muscle)                            | GYS1      | EG1 | 2 | 7 | 2 | 3 | 2,72E-05 | 0,0029338410,0540847830,274766231 |
| 201712_s_at  | NM_006267 | Hs.199561            | RAN binding protein 2                                   | RANBP2    | EG1 | 9 | 0 | 4 | 1 | 2,72E-05 | 0,0029338410,0540847830,274766231 |
| 203209_at    | BC001866  | Hs.506989            | replication factor C (activator 1) 5, 36.5kDa           | RFC5      | EG1 | 4 | 5 | 2 | 3 | 2,72E-05 | 0,0029338410,0540847830,274766231 |
| 204243_at    | NM_012421 | Hs.205627            | rearranged L-myc fusion                                 | RLF       | EG1 | 6 | 3 | 2 | 3 | 2,72E-05 | 0,0029338410,0540847830,274766231 |
| 204270_at    | AI568728  | Hs.555981            |                                                         | FLJ13941  | EG1 | 3 | 6 | 2 | 3 | 2,72E-05 | 0,0029338410,0540847830,274766231 |
| 204331_s_at  | NM_021107 | Hs.411125            | mitochondrial ribosomal protein S12                     | MRPS12    | EG1 | 2 | 7 | 3 | 2 | 2,72E-05 | 0,0029338410,0540847830,274766231 |
| 204545_at    | NM_000287 | Hs.107410            | peroxisomal biogenesis factor 6                         | PEX6      | EG1 | 3 | 6 | 0 | 5 | 2,72E-05 | 0,0029338410,0540847830,274766231 |
| 204857_at    | NM_003550 | Hs.209128            | MAD1 mitotic arrest deficient-like 1 (yeast)            | MAD1L1    | EG1 | 1 | 8 | 1 | 4 | 2,72E-05 | 0,0029338410,0540847830,274766231 |
| 207713_s_at  | NM_006462 | Hs.247280            | chromosome 20 open reading frame 18                     | C20orf18  | EG1 | 1 | 8 | 2 | 3 | 2,72E-05 | 0,0029338410,0540847830,274766231 |
| 210048_at    | BC001889  | Hs.464622            | N-ethylmaleimide-sensitive factor attachment protei     | NAPG      | EG1 | 6 | 3 | 2 | 3 | 2,72E-05 | 0,0029338410,0540847830,274766231 |
| 217370_x_at  | S75762    | Hs.513522            | fusion (involved in t(12, 16) in malignant liposarcoma) | FUS       | EG1 | 7 | 2 | 3 | 2 | 2,72E-05 | 0,0029338410,0540847830,274766231 |
| 217936_at    | AW044631  | Hs.525287            | Rho GTPase activating protein 5                         | ARHGAP5   | EG1 | 7 | 2 | 0 | 5 | 2,72E-05 | 0,0029338410,0540847830,274766231 |
| 220934_s_at  | NM_024084 | Hs.530463            |                                                         | MGC3196   | EG1 | 2 | 7 | 3 | 2 | 2,72E-05 | 0,0029338410,0540847830,274766231 |
| 221919_at    | AW450929  | Hs.210850, H         | heterogeneous nuclear ribonucleoprotein A1              | HNRPA1    | EG1 | 9 | 0 | 4 | 1 | 2,72E-05 | 0,0029338410,0540847830,274766231 |
| 222872_x_at  | AU157541  | Hs.118183            |                                                         | FLJ22833  | EG1 | 6 | 3 | 3 | 2 | 2,72E-05 | 0,0029338410,0540847830,274766231 |
| 223025_s_at  | AF290613  | Hs.71040             | adaptor-related protein complex 1, mu 1 subunit         | AP1M1     | EG1 | 4 | 5 | 2 | 3 | 2,72E-05 | 0,0029338410,0540847830,274766231 |
| 223839_s_at  | AF132203  | Hs.368641            | stearoyl-CoA desaturase (delta-9-desaturase)            | SCD       | EG1 | 3 | 6 | 1 | 4 | 2,72E-05 | 0,0029338410,0540847830,274766231 |
| 224315_at    | AL133598  | Hs.485810            | DEAD (Asp-Glu-Ala-Asp) box polypeptide 20               | DDX20     | EG1 | 8 | 1 | 3 | 2 | 2,72E-05 | 0,0029338410,0540847830,274766231 |
| 225539_at    | AP001745  | Hs.434947            | zinc finger protein 295                                 | ZNF295    | EG1 | 9 | 0 | 4 | 1 | 2,72E-05 | 0,0029338410,0540847830,274766231 |
| 225747_at    | AL521634  | Hs.4096              |                                                         | FLJ32452  | EG1 | 6 | 3 | 4 | 1 | 2,72E-05 | 0,0029338410,0540847830,274766231 |
| 225766_s_at  | AA527296  | Hs.482497            | transportin 1                                           | TNPO1     | EG1 | 7 | 2 | 2 | 3 | 2,72E-05 | 0,0029338410,0540847830,274766231 |
| 226018_at    | W73230    | Hs.200100            |                                                         | Ells1     | EG1 | 6 | 3 | 2 | 3 | 2,72E-05 | 0,0029338410,0540847830,274766231 |
| 226541_at    | AI808182  | Hs.421095            | F-box protein 30                                        | FBXO30    | EG1 | 9 | 0 | 4 | 1 | 2,72E-05 | 0,0029338410,0540847830,274766231 |
| 228812_at    | AI652899  |                      |                                                         |           | EG1 | 7 | 2 | 3 | 2 | 2,72E-05 | 0,0029338410,0540847830,274766231 |
| 229151_at    | BE673587  | Hs.101307            | solute carrier family 14 (urea transporter), member 1 ( | SLC14A1   | EG1 | 6 | 3 | 4 | 1 | 2,72E-05 | 0,0029338410,0540847830,274766231 |
| 231252_at    | AI680874  | Hs.122934            |                                                         | FLJ23861  | EG1 | 6 | 3 | 3 | 2 | 2,72E-05 | 0,0029338410,0540847830,274766231 |
| 231793_s_at  | AA448956  | Hs.144114            | calcium/calmodulin-dependent protein kinase (CaM k      | CAMK2D    | EG1 | 7 | 2 | 3 | 2 | 2,72E-05 | 0,0029338410,0540847830,274766231 |
| 232092_at    | AI268054  | Hs.46791             | mitochondrial carrier triple repeat 1                   | MCART1    | EG1 | 8 | 1 | 3 | 2 | 2,72E-05 | 0,0029338410,0540847830,274766231 |
| 233406_at    | AK022100  | Hs.9997              |                                                         | KIAA0256  | EG1 | 2 | 7 | 3 | 2 | 2,72E-05 | 0,0029338410,0540847830,274766231 |
| 235067_at    | D81987    | Hs.44693, Hs         | muskelin 1, intracellular mediator containing kelch m   | MKLN1     | EG1 | 7 | 2 | 3 | 2 | 2,72E-05 | 0,0029338410,0540847830,274766231 |
| 235848_x_at  | N35250    |                      |                                                         |           | EG1 | 6 | 3 | 1 | 4 | 2,72E-05 | 0,0029338410,0540847830,274766231 |
| 239334_at    | AI349167  | Hs.490795            | family with sequence similarity 62 (C2 domain contain   | FAM62B    | EG1 | 5 | 4 | 4 | 1 | 2,72E-05 | 0,0029338410,0540847830,274766231 |
| 239630_at    | BF516583  |                      |                                                         |           | EG1 | 4 | 5 | 3 | 2 | 2,72E-05 | 0,0029338410,0540847830,274766231 |
| 239835_at    | AA669114  | Hs.116665            | kelch repeat and BTB (POZ) domain containing 8          | KBTD8     | EG1 | 5 | 4 | 4 | 1 | 2,72E-05 | 0,0029338410,0540847830,274766231 |
| 239979_at    | BE645480  | Hs.546467            | epithelial stromal interaction 1 (breast)               | EPSTI1    | EG1 | 3 | 6 | 3 | 2 | 2,72E-05 | 0,0029338410,0540847830,274766231 |
| 240141_at    | BF062399  |                      |                                                         |           | EG1 | 4 | 5 | 4 | 1 | 2,72E-05 | 0,0029338410,0540847830,274766231 |
| 241388_at    | AL567118  |                      |                                                         |           | EG1 | 6 | 3 | 2 | 3 | 2,72E-05 | 0,0029338410,0540847830,274766231 |

|              |             |            |                                                         |           |     |   |   |   |   |          |                                   |
|--------------|-------------|------------|---------------------------------------------------------|-----------|-----|---|---|---|---|----------|-----------------------------------|
| 241837_at    | AI289774    | Hs.535297  | AT rich interactive domain 5B (MRF1-like)               | ARID5B    | EG1 | 4 | 5 | 3 | 2 | 2,72E-05 | 0,0029338410,0540847830,274766231 |
| 242539_at    | AW665509    | Hs.471637  |                                                         | MGC42174  | EG1 | 5 | 4 | 2 | 3 | 2,72E-05 | 0,0029338410,0540847830,274766231 |
| 243659_at    | N63876      | Hs.192221, | H elongation factor, RNA polymerase II, 2               | ELL2      | EG1 | 5 | 4 | 3 | 2 | 2,72E-05 | 0,0029338410,0540847830,274766231 |
| AFFX-PheX-5_ | AFFX-PHEX-5 |            |                                                         |           | EG1 | 5 | 4 | 2 | 3 | 2,72E-05 | 0,0029338410,0540847830,274766231 |
| 1555878_at   | AK094613    | Hs.356794  | ribosomal protein S24                                   | RPS24     | EG1 | 8 | 1 | 3 | 1 | 2,72E-05 | 0,0029338410,1581335050,559565828 |
| 1561640_at   | BC008637    | Hs.193725  | proteasome (prosome, macropain) 26S subunit, non-A      | PSMD5     | EG1 | 6 | 3 | 2 | 2 | 2,72E-05 | 0,0029338410,1581335050,559565828 |
| 201660_at    | AL525798    | Hs.471461  | acyl-CoA synthetase long-chain family member 3          | ACSL3     | EG1 | 9 | 0 | 1 | 3 | 2,72E-05 | 0,0029338410,1581335050,559565828 |
| 204824_at    | NM_004435   | Hs.420106  | endonuclease G                                          | ENDOG     | EG1 | 2 | 7 | 1 | 3 | 2,72E-05 | 0,0029338410,1581335050,559565828 |
| 205241_at    | NM_005138   | Hs.549099  | SCO cytochrome oxidase deficient homolog 2 (yeast)      | SCO2      | EG1 | 2 | 7 | 3 | 1 | 2,72E-05 | 0,0029338410,1581335050,559565828 |
| 205249_at    | NM_000399   | Hs.1395    | early growth response 2 (Krox-20 homolog, Drosophila)   | EGR2      | EG1 | 3 | 6 | 3 | 1 | 2,72E-05 | 0,0029338410,1581335050,559565828 |
| 206613_s_at  | NM_005681   | Hs.153088  | TATA box binding protein (TBP)-associated factor, RN    | TAF1A     | EG1 | 7 | 2 | 2 | 2 | 2,72E-05 | 0,0029338410,1581335050,559565828 |
| 209482_at    | BC001430    | Hs.416994  | processing of precursor 7, ribonuclease P subunit (S. c | POP7      | EG1 | 3 | 6 | 2 | 2 | 2,72E-05 | 0,0029338410,1581335050,559565828 |
| 209919_x_at  | L20490      | Hs.287505, | H gamma-glutamyltransferase 1                           | GGT1      | EG1 | 3 | 6 | 3 | 1 | 2,72E-05 | 0,0029338410,1581335050,559565828 |
| 210075_at    | AF151074    | Hs.445113  | membrane-associated ring finger (C3HC4) 2               | MARCH2    | EG1 | 3 | 6 | 2 | 2 | 2,72E-05 | 0,0029338410,1581335050,559565828 |
| 210716_s_at  | M97501      | Hs.524809  | restin (Reed-Steinberg cell-expressed intermediate fi   | RSN       | EG1 | 9 | 0 | 3 | 1 | 2,72E-05 | 0,0029338410,1581335050,559565828 |
| 212930_at    | AW576457    | Hs.506276  | ATPase, Ca++ transporting, plasma membrane 1            | ATP2B1    | EG1 | 8 | 1 | 1 | 3 | 2,72E-05 | 0,0029338410,1581335050,559565828 |
| 215043_s_at  | X83301      | Hs.519366, | Hs.553981                                               | SMA5      | EG1 | 2 | 7 | 2 | 2 | 2,72E-05 | 0,0029338410,1581335050,559565828 |
| 215567_at    | AU144919    | Hs.343173  | chromosome 14 open reading frame 111                    | C14orf111 | EG1 | 6 | 3 | 3 | 1 | 2,72E-05 | 0,0029338410,1581335050,559565828 |
| 217954_s_at  | NM_015153   | Hs.348921  | PHD finger protein 3                                    | PHF3      | EG1 | 9 | 0 | 1 | 3 | 2,72E-05 | 0,0029338410,1581335050,559565828 |
| 218070_s_at  | NM_013335   | Hs.27059   | GDP-mannose pyrophosphorylase A                         | GMPPA     | EG1 | 1 | 8 | 2 | 2 | 2,72E-05 | 0,0029338410,1581335050,559565828 |
| 218399_s_at  | NM_017955   | Hs.34045   | cell division cycle associated 4                        | CDCA4     | EG1 | 5 | 4 | 2 | 2 | 2,72E-05 | 0,0029338410,1581335050,559565828 |
| 218529_at    | NM_016579   | Hs.333427  | CD320 antigen                                           | CD320     | EG1 | 3 | 6 | 3 | 1 | 2,72E-05 | 0,0029338410,1581335050,559565828 |
| 219164_s_at  | NM_018036   | Hs.168241  | chromosome 14 open reading frame 103                    | C14orf103 | EG1 | 7 | 2 | 2 | 2 | 2,72E-05 | 0,0029338410,1581335050,559565828 |
| 220368_s_at  | NM_017936   | Hs.533887  | KIAA2010                                                | KIAA2010  | EG1 | 9 | 0 | 3 | 1 | 2,72E-05 | 0,0029338410,1581335050,559565828 |
| 221826_at    | BE671941    | Hs.157078  | angel homolog 2 (Drosophila)                            | ANGEL2    | EG1 | 8 | 1 | 1 | 3 | 2,72E-05 | 0,0029338410,1581335050,559565828 |
| 224582_s_at  | H09085      | Hs.213061  | nuclear casein kinase and cyclin-dependent kinase su    | NUCKS1    | EG1 | 8 | 1 | 3 | 1 | 2,72E-05 | 0,0029338410,1581335050,559565828 |
| 225197_at    | W58461      | Hs.221497  |                                                         | PRO0149   | EG1 | 8 | 1 | 0 | 4 | 2,72E-05 | 0,0029338410,1581335050,559565828 |
| 225870_s_at  | BF569208    | Hs.432413  | trafficking protein particle complex 5                  | TRAPPC5   | EG1 | 2 | 7 | 1 | 3 | 2,72E-05 | 0,0029338410,1581335050,559565828 |
| 225898_at    | AK023015    | Hs.554894  | WD repeat domain 54                                     | WDR54     | EG1 | 1 | 8 | 4 | 0 | 2,72E-05 | 0,0029338410,1581335050,559565828 |
| 227031_at    | AV681975    | Hs.487648  | sorting nexin 13                                        | SNX13     | EG1 | 8 | 1 | 2 | 2 | 2,72E-05 | 0,0029338410,1581335050,559565828 |
| 227751_at    | AI817145    | Hs.443831, | H programmed cell death 5                               | PDCD5     | EG1 | 5 | 4 | 3 | 1 | 2,72E-05 | 0,0029338410,1581335050,559565828 |
| 230850_at    | AI652647    | Hs.179838  | formin-like 3                                           | FMNL3     | EG1 | 8 | 1 | 3 | 1 | 2,72E-05 | 0,0029338410,1581335050,559565828 |
| 230937_at    | AW008207    | Hs.130838  |                                                         | LOC442200 | EG1 | 2 | 7 | 1 | 3 | 2,72E-05 | 0,0029338410,1581335050,559565828 |
| 235698_at    | AA771779    | Hs.461074  | zinc finger protein 90 homolog (mouse)                  | ZFP90     | EG1 | 4 | 5 | 3 | 1 | 2,72E-05 | 0,0029338410,1581335050,559565828 |
| 235791_x_at  | AU155298    | Hs.519474  | chromodomain helicase DNA binding protein 1             | CHD1      | EG1 | 8 | 1 | 2 | 2 | 2,72E-05 | 0,0029338410,1581335050,559565828 |
| 236059_at    | AW168168    | Hs.146079  |                                                         | FLJ23342  | EG1 | 8 | 1 | 2 | 2 | 2,72E-05 | 0,0029338410,1581335050,559565828 |
| 239106_at    | AI801563    | Hs.532326  | carbonic anhydrase VB-like                              | CA5BL     | EG1 | 9 | 0 | 3 | 1 | 2,72E-05 | 0,0029338410,1581335050,559565828 |
| 239437_at    | AI915827    |            |                                                         |           | EG1 | 8 | 1 | 3 | 1 | 2,72E-05 | 0,0029338410,1581335050,559565828 |
| 240600_at    | AI342146    | Hs.532091  | adaptor-related protein complex 3, beta 1 subunit       | AP3B1     | EG1 | 2 | 7 | 4 | 0 | 2,72E-05 | 0,0029338410,1581335050,559565828 |
| 243709_at    | BG054799    | Hs.128696  |                                                         | FLJ90709  | EG1 | 3 | 6 | 2 | 2 | 2,72E-05 | 0,0029338410,1581335050,559565828 |
| 243788_at    | AA789293    | Hs.369039  | PHD finger protein 11                                   | PHF11     | EG1 | 1 | 8 | 2 | 2 | 2,72E-05 | 0,0029338410,1581335050,559565828 |
| 1554229_at   | AY174896    | Hs.484195  | adult retina protein                                    | LOC153222 | EG1 | 4 | 5 | 2 | 1 | 2,72E-05 | 0,0029338410,3636349230,911710613 |
| 1559025_at   | AL833770    | Hs.440932  | septin 9                                                | SEPT9     | EG1 | 7 | 2 | 3 | 0 | 2,72E-05 | 0,0029338410,3636349230,911710613 |
| 1563497_at   | AL833500    | Hs.473370  | ubiquitin specific peptidase 25                         | USP25     | EG1 | 5 | 4 | 2 | 1 | 2,72E-05 | 0,0029338410,3636349230,911710613 |
| 201284_s_at  | NM_001640   | Hs.517969  | N-acylaminoacyl-peptide hydrolase                       | APEH      | EG1 | 1 | 8 | 1 | 2 | 2,72E-05 | 0,0029338410,3636349230,911710613 |



|               |             |            |                                                       |           |     |   |   |   |   |          |                                   |
|---------------|-------------|------------|-------------------------------------------------------|-----------|-----|---|---|---|---|----------|-----------------------------------|
| 202331_at     | NM_000709   | Hs.433307  | branched chain keto acid dehydrogenase E1, alpha pol  | BCKDHA    | EG1 | 0 | 9 | 1 | 2 | 2,72E-05 | 0,0029338410,3636349230,911710613 |
| 202928_s_at   | NM_024165   | Hs.166204  | PHD finger protein 1                                  | PHF1      | EG1 | 5 | 4 | 1 | 2 | 2,72E-05 | 0,0029338410,3636349230,911710613 |
| 203189_s_at   | NM_002496   | Hs.90443   | NADH dehydrogenase (ubiquinone) Fe-S protein 8, 23    | NDUFS8    | EG1 | 2 | 7 | 0 | 3 | 2,72E-05 | 0,0029338410,3636349230,911710613 |
| 206976_s_at   | NM_006644   | Hs.36927   | heat shock 105kDa/110kDa protein 1                    | HSPH1     | EG1 | 9 | 0 | 2 | 1 | 2,72E-05 | 0,0029338410,3636349230,911710613 |
| 210950_s_at   | BC003573    | Hs.546253  | farnesyl-diphosphate farnesyltransferase 1            | FDFT1     | EG1 | 2 | 7 | 1 | 2 | 2,72E-05 | 0,0029338410,3636349230,911710613 |
| 222569_at     | AU153746    | Hs.34180   | UDP-glucose ceramide glucosyltransferase-like 1       | UGCGL1    | EG1 | 7 | 2 | 0 | 3 | 2,72E-05 | 0,0029338410,3636349230,911710613 |
| 223109_at     | BC001457    | Hs.555929  | TruB pseudouridine (psi) synthase homolog 2 (E. coli) | TRUB2     | EG1 | 1 | 8 | 2 | 1 | 2,72E-05 | 0,0029338410,3636349230,911710613 |
| 223585_x_at   | AF151831    | Hs.372541, | kelch repeat and BTB (POZ) domain containing 2        | KBTBD2    | EG1 | 8 | 1 | 3 | 0 | 2,72E-05 | 0,0029338410,3636349230,911710613 |
| 224489_at     | BC006271    | Hs.405514  |                                                       | LOC284058 | EG1 | 5 | 4 | 2 | 1 | 2,72E-05 | 0,0029338410,3636349230,911710613 |
| 225830_at     | AI052247    | Hs.501149  | PDZ domain containing 8                               | PDZK8     | EG1 | 8 | 1 | 3 | 0 | 2,72E-05 | 0,0029338410,3636349230,911710613 |
| 225878_at     | AL135264    | Hs.97858   | kinesin family member 1B                              | KIF1B     | EG1 | 9 | 0 | 2 | 1 | 2,72E-05 | 0,0029338410,3636349230,911710613 |
| 226370_at     | BG149487    | Hs.495854  | kelch-like 15 (Drosophila)                            | KLHL15    | EG1 | 8 | 1 | 1 | 2 | 2,72E-05 | 0,0029338410,3636349230,911710613 |
| 226942_at     | AI742668    | Hs.304362  | PHD finger protein 20-like 1                          | PHF20L1   | EG1 | 8 | 1 | 2 | 1 | 2,72E-05 | 0,0029338410,3636349230,911710613 |
| 228655_at     | BE466077    |            |                                                       |           | EG1 | 6 | 3 | 2 | 1 | 2,72E-05 | 0,0029338410,3636349230,911710613 |
| 230970_at     | AA975530    | Hs.335205  | slingshot homolog 2 (Drosophila)                      | SSH2      | EG1 | 4 | 5 | 1 | 2 | 2,72E-05 | 0,0029338410,3636349230,911710613 |
| 232628_at     | AI740629    | Hs.97270,  | Hs family with sequence similarity 13, member A1      | FAM13A1   | EG1 | 4 | 5 | 2 | 1 | 2,72E-05 | 0,0029338410,3636349230,911710613 |
| 235390_at     | AA398321    | Hs.519343  |                                                       | P18SRP    | EG1 | 9 | 0 | 3 | 0 | 2,72E-05 | 0,0029338410,3636349230,911710613 |
| 235557_at     | AW082827    | Hs.348629  |                                                       | LOC150763 | EG1 | 5 | 4 | 0 | 3 | 2,72E-05 | 0,0029338410,3636349230,911710613 |
| 235860_at     | AA719526    | Hs.345694  | potassium channel modulatory factor 1                 | KCMF1     | EG1 | 8 | 1 | 3 | 0 | 2,72E-05 | 0,0029338410,3636349230,911710613 |
| 236310_at     | BE645334    | Hs.278064, | zinc finger protein 37b (KOX 21)                      | ZNF37B    | EG1 | 8 | 1 | 2 | 1 | 2,72E-05 | 0,0029338410,3636349230,911710613 |
| 238032_at     | T68858      | Hs.289347  | dehydrogenase/reductase (SDR family) member 3         | DHRS3     | EG1 | 4 | 5 | 0 | 3 | 2,72E-05 | 0,0029338410,3636349230,911710613 |
| 238496_at     | AA741074    | Hs.32099   | Wolf-Hirschhorn syndrome candidate 1-like 1           | WHSC1L1   | EG1 | 6 | 3 | 1 | 2 | 2,72E-05 | 0,0029338410,3636349230,911710613 |
| 239070_at     | AI434790    |            |                                                       |           | EG1 | 2 | 7 | 0 | 3 | 2,72E-05 | 0,0029338410,3636349230,911710613 |
| AFFX-LysX-3_a | AFFX-LYSX-3 |            |                                                       |           | EG1 | 4 | 5 | 2 | 1 | 2,72E-05 | 0,0029338410,3636349230,911710613 |
| 1559946_s_at  | AI860098    | Hs.515846  | RuvB-like 2 (E. coli)                                 | RUVBL2    | EG1 | 2 | 7 | 1 | 1 | 2,72E-05 | 0,0029338410,6490161710,911710613 |
| 200822_x_at   | NM_000365   | Hs.524219  | triosephosphate isomerase 1                           | TPI1      | EG1 | 1 | 8 | 0 | 2 | 2,72E-05 | 0,0029338410,6490161710,911710613 |
| 204080_at     | NM_025077   | Hs.288198  | target of EGR1, member 1 (nuclear)                    | TOE1      | EG1 | 4 | 5 | 2 | 0 | 2,72E-05 | 0,0029338410,6490161710,911710613 |
| 212436_at     | AI967961    | Hs.26837   | tripartite motif-containing 33                        | TRIM33    | EG1 | 7 | 2 | 2 | 0 | 2,72E-05 | 0,0029338410,6490161710,911710613 |
| 213672_at     | AA621558    | Hs.355867  | methionine-tRNA synthetase                            | MARS      | EG1 | 7 | 2 | 2 | 0 | 2,72E-05 | 0,0029338410,6490161710,911710613 |
| 216960_s_at   | AL049646    | Hs.472221  | zinc finger protein 133 (clone pHZ-13)                | ZNF133    | EG1 | 0 | 9 | 2 | 0 | 2,72E-05 | 0,0029338410,6490161710,911710613 |
| 219433_at     | NM_017745   | Hs.186424  | BCL6 co-repressor                                     | BCOR      | EG1 | 7 | 2 | 2 | 0 | 2,72E-05 | 0,0029338410,6490161710,911710613 |
| 222133_s_at   | AK022280    | Hs.304362  | PHD finger protein 20-like 1                          | PHF20L1   | EG1 | 8 | 1 | 1 | 1 | 2,72E-05 | 0,0029338410,6490161710,911710613 |
| 222580_at     | AK023596    | Hs.173001  | zinc finger protein 644                               | ZNF644    | EG1 | 8 | 1 | 1 | 1 | 2,72E-05 | 0,0029338410,6490161710,911710613 |
| 223515_s_at   | AL136726    | Hs.299208  | coenzyme Q3 homolog, methyltransferase (yeast)        | COQ3      | EG1 | 7 | 2 | 1 | 1 | 2,72E-05 | 0,0029338410,6490161710,911710613 |
| 224956_at     | AI743689    | Hs.462598  |                                                       | 182-FIP   | EG1 | 9 | 0 | 2 | 0 | 2,72E-05 | 0,0029338410,6490161710,911710613 |
| 225565_at     | AA769455    | Hs.516646  | cAMP responsive element binding protein 1             | CREB1     | EG1 | 1 | 8 | 1 | 1 | 2,72E-05 | 0,0029338410,6490161710,911710613 |
| 225743_at     | AI125996    | Hs.33719   | RNA pseudouridylate synthase domain containing 3      | RPUSD3    | EG1 | 3 | 6 | 2 | 0 | 2,72E-05 | 0,0029338410,6490161710,911710613 |
| 225821_s_at   | AI744726    | Hs.106204  |                                                       | KIAA1327  | EG1 | 8 | 1 | 1 | 1 | 2,72E-05 | 0,0029338410,6490161710,911710613 |
| 226934_at     | AU149663    | Hs.369606  | cleavage and polyadenylation specific factor 6, 68kDa | CPSF6     | EG1 | 8 | 1 | 0 | 2 | 2,72E-05 | 0,0029338410,6490161710,911710613 |
| 228764_s_at   | AI813313    | Hs.220963  |                                                       | MGC5987   | EG1 | 2 | 7 | 0 | 2 | 2,72E-05 | 0,0029338410,6490161710,911710613 |
| 230120_s_at   | AI088455    | Hs.528525  |                                                       | LOC400966 | EG1 | 7 | 2 | 1 | 1 | 2,72E-05 | 0,0029338410,6490161710,911710613 |
| 235689_at     | AL563572    | Hs.531615  | mitochondrial methionyl-tRNA formyltransferase        | MTFMT     | EG1 | 3 | 6 | 1 | 1 | 2,72E-05 | 0,0029338410,6490161710,911710613 |
| 239946_at     | AA776723    | Hs.205572  |                                                       | KIAA0922  | EG1 | 7 | 2 | 0 | 2 | 2,72E-05 | 0,0029338410,6490161710,911710613 |
| 200776_s_at   | AL518328    | Hs.529231  |                                                       | LOC151579 | EG1 | 9 | 0 | 1 | 0 | 2,72E-05 | 0,0029338410,8976818490,911710613 |
| 229914_at     | AU148141    | Hs.485420  |                                                       | FLJ38717  | EG1 | 8 | 1 | 0 | 1 | 2,72E-05 | 0,0029338410,8976818490,911710613 |

|              |           |            |                                                           |           |           |    |    |    |   |          |             |             |             |
|--------------|-----------|------------|-----------------------------------------------------------|-----------|-----------|----|----|----|---|----------|-------------|-------------|-------------|
| 231319_x_at  | AI657069  | Hs.373947  | kinesin family member 9                                   | KIF9      | EG1       | 8  | 1  | 0  | 1 | 2,72E-05 | 0,002933841 | 0,897681849 | 0,911710613 |
| 232709_at    | AU156167  |            |                                                           |           | EG1       | 9  | 0  | 1  | 0 | 2,72E-05 | 0,002933841 | 0,897681849 | 0,911710613 |
| 236629_at    | AW243177  | Hs.237017  | chromosome 1 open reading frame 69                        | C1orf69   | EG1       | 6  | 3  | 1  | 0 | 2,72E-05 | 0,002933841 | 0,897681849 | 0,911710613 |
| 1555858_at   | CA430188  |            |                                                           |           | EG1 + EG2 | 12 | 3  | 7  | 2 | 5,34E-13 | 0,002933841 | 8,42E-05    | 0,002977773 |
| 202503_s_at  | NM_014736 | Hs.81892   | KIAA0101                                                  | KIAA0101  | EG1 + EG2 | 7  | 7  | 6  | 7 | 2,15E-11 | 0,002933841 | 4,56E-09    | 0,001562433 |
| 209773_s_at  | BC001886  | Hs.226390  | ribonucleotide reductase M2 polypeptide                   | RRM2      | EG1 + EG2 | 8  | 6  | 3  | 7 | 2,15E-11 | 0,002933841 | 9,97E-06    | 0,001562433 |
| 210567_s_at  | BC001441  | Hs.23348   | S-phase kinase-associated protein 2 (p45)                 | SKP2      | EG1 + EG2 | 5  | 9  | 3  | 7 | 2,15E-11 | 0,002933841 | 9,97E-06    | 0,001562433 |
| 1554020_at   | BC010091  | Hs.505202  | bicaudal D homolog 1 (Drosophila)                         | BICD1     | EG1 + EG2 | 10 | 3  | 7  | 4 | 6,10E-10 | 0,002933841 | 9,59E-07    | 0,001562433 |
| 201890_at    | BE966236  | Hs.226390  | ribonucleotide reductase M2 polypeptide                   | RRM2      | EG1 + EG2 | 7  | 5  | 4  | 9 | 1,28E-08 | 0,002933841 | 4,56E-09    | 0,001562433 |
| 242245_at    | N90719    | Hs.533853  | synapse defective 1, Rho GTPase, homolog 2 (C. elega      | SYDE2     | EG1 + EG2 | 7  | 5  | 5  | 8 | 1,28E-08 | 0,002933841 | 4,56E-09    | 0,001562433 |
| 205822_s_at  | NM_002130 | Hs.397729  | 3-hydroxy-3-methylglutaryl-Coenzyme A synthase 1 (s       | HMGCS1    | EG1 + EG2 | 9  | 3  | 9  | 3 | 1,28E-08 | 0,002933841 | 7,43E-08    | 0,001562433 |
| 208078_s_at  | NM_030751 | Hs.124503  | transcription factor 8 (represses interleukin 2 expressi  | TCF8      | EG1 + EG2 | 6  | 6  | 6  | 6 | 1,28E-08 | 0,002933841 | 7,43E-08    | 0,001562433 |
| 225687_at    | BC001068  | Hs.472716  | chromosome 20 open reading frame 129                      | C20orf129 | EG1 + EG2 | 11 | 1  | 7  | 4 | 1,28E-08 | 0,002933841 | 9,59E-07    | 0,001562433 |
| 238542_at    | AA831769  | Hs.250618  | UL16 binding protein 2                                    | ULBP2     | EG1 + EG2 | 10 | 2  | 7  | 4 | 1,28E-08 | 0,002933841 | 9,59E-07    | 0,001562433 |
| 202705_at    | NM_004701 | Hs.194698  | cyclin B2                                                 | CCNB2     | EG1 + EG2 | 5  | 7  | 3  | 7 | 1,28E-08 | 0,002933841 | 9,97E-06    | 0,001562433 |
| 211367_s_at  | U13699    | Hs.2490    | caspase 1, apoptosis-related cysteine peptidase (inter    | CASP1     | EG1 + EG2 | 2  | 10 | 7  | 3 | 1,28E-08 | 0,002933841 | 9,97E-06    | 0,001562433 |
| 212143_s_at  | BF340228  | Hs.450230  | insulin-like growth factor binding protein 3              | IGFBP3    | EG1 + EG2 | 4  | 8  | 7  | 3 | 1,28E-08 | 0,002933841 | 9,97E-06    | 0,001562433 |
| 222118_at    | AK023669  | Hs.283532  |                                                           | BM039     | EG1 + EG2 | 10 | 2  | 3  | 7 | 1,28E-08 | 0,002933841 | 9,97E-06    | 0,001562433 |
| 1559096_x_at | AK095307  | Hs.216653  | F-box protein 9                                           | FBX09     | EG1 + EG2 | 8  | 4  | 8  | 1 | 1,28E-08 | 0,002933841 | 8,42E-05    | 0,002977773 |
| 201694_s_at  | NM_001964 | Hs.326035  | early growth response 1                                   | EGR1      | EG1 + EG2 | 6  | 6  | 7  | 2 | 1,28E-08 | 0,002933841 | 8,42E-05    | 0,002977773 |
| 206102_at    | NM_021067 | Hs.360033  |                                                           | PSF1      | EG1 + EG2 | 5  | 7  | 3  | 6 | 1,28E-08 | 0,002933841 | 8,42E-05    | 0,002977773 |
| 222846_at    | AB038995  | Hs.389733  | RAB8B, member RAS oncogene family                         | RAB8B     | EG1 + EG2 | 10 | 2  | 6  | 3 | 1,28E-08 | 0,002933841 | 8,42E-05    | 0,002977773 |
| 201008_s_at  | AA812232  | Hs.533977  | thioredoxin interacting protein                           | TXNIP     | EG1 + EG2 | 2  | 9  | 7  | 7 | 2,08E-07 | 0,002933841 | 2,17E-10    | 0,001562433 |
| 201009_s_at  | AI439556  | Hs.533977  | thioredoxin interacting protein                           | TXNIP     | EG1 + EG2 | 2  | 9  | 7  | 7 | 2,08E-07 | 0,002933841 | 2,17E-10    | 0,001562433 |
| 201170_s_at  | NM_003670 | Hs.171825  | basic helix-loop-helix domain containing, class B, 2      | BHLHB2    | EG1 + EG2 | 5  | 6  | 10 | 3 | 2,08E-07 | 0,002933841 | 4,56E-09    | 0,001562433 |
| 216607_s_at  | U40053    | Hs.417077  | cytochrome P450, family 51, subfamily A, polypeptide      | CYP51A1   | EG1 + EG2 | 10 | 1  | 10 | 3 | 2,08E-07 | 0,002933841 | 4,56E-09    | 0,001562433 |
| 1555938_x_at | AI520969  | Hs.533317  | vimentin                                                  | VIM       | EG1 + EG2 | 8  | 3  | 10 | 2 | 2,08E-07 | 0,002933841 | 7,43E-08    | 0,001562433 |
| 1557527_at   | BU789637  | Hs.149261, | H runt-related transcription factor 1 (acute myeloid leuk | RUNX1     | EG1 + EG2 | 2  | 9  | 9  | 3 | 2,08E-07 | 0,002933841 | 7,43E-08    | 0,001562433 |
| 203799_at    | NM_014880 | Hs.130014  | CD302 antigen                                             | CD302     | EG1 + EG2 | 7  | 4  | 6  | 6 | 2,08E-07 | 0,002933841 | 7,43E-08    | 0,001562433 |
| 1556821_x_at | H48516    | Hs.508041  | deleted in lymphocytic leukemia, 2                        | DLEU2     | EG1 + EG2 | 7  | 4  | 5  | 6 | 2,08E-07 | 0,002933841 | 9,59E-07    | 0,001562433 |
| 213348_at    | N33167    | Hs.106070  | cyclin-dependent kinase inhibitor 1C (p57, Kip2)          | CDKN1C    | EG1 + EG2 | 5  | 6  | 5  | 6 | 2,08E-07 | 0,002933841 | 9,59E-07    | 0,001562433 |
| 214657_s_at  | AU134977  | Hs.523789  |                                                           | TncRNA    | EG1 + EG2 | 8  | 3  | 6  | 5 | 2,08E-07 | 0,002933841 | 9,59E-07    | 0,001562433 |
| 218009_s_at  | NM_003981 | Hs.459362  | protein regulator of cytokinesis 1                        | PRC1      | EG1 + EG2 | 10 | 1  | 5  | 6 | 2,08E-07 | 0,002933841 | 9,59E-07    | 0,001562433 |
| 223079_s_at  | AI828035  | Hs.116448  | glutaminase                                               | GLS       | EG1 + EG2 | 10 | 1  | 7  | 4 | 2,08E-07 | 0,002933841 | 9,59E-07    | 0,001562433 |
| 228069_at    | AL138828  | Hs.121536  | family with sequence similarity 54, member A              | FAM54A    | EG1 + EG2 | 9  | 2  | 2  | 9 | 2,08E-07 | 0,002933841 | 9,59E-07    | 0,001562433 |
| 230494_at    | AI671885  | Hs.187946  | solute carrier family 20 (phosphate transporter), mem     | SLC20A1   | EG1 + EG2 | 7  | 4  | 8  | 3 | 2,08E-07 | 0,002933841 | 9,59E-07    | 0,001562433 |
| 201663_s_at  | NM_005496 | Hs.58992   | SMC4 structural maintenance of chromosomes 4-like 1       | SMC4L1    | EG1 + EG2 | 10 | 1  | 5  | 5 | 2,08E-07 | 0,002933841 | 9,97E-06    | 0,001562433 |
| 201790_s_at  | AW150953  | Hs.503134  | 7-dehydrocholesterol reductase                            | DHCR7     | EG1 + EG2 | 7  | 4  | 7  | 3 | 2,08E-07 | 0,002933841 | 9,97E-06    | 0,001562433 |
| 203362_s_at  | NM_002358 | Hs.509523, | H MAD2 mitotic arrest deficient-like 1 (yeast)            | MAD2L1    | EG1 + EG2 | 7  | 4  | 3  | 7 | 2,08E-07 | 0,002933841 | 9,97E-06    | 0,001562433 |
| 205321_at    | NM_001415 | Hs.539684  | eukaryotic translation initiation factor 2, subunit 3 ga  | EIF2S3    | EG1 + EG2 | 10 | 1  | 3  | 7 | 2,08E-07 | 0,002933841 | 9,97E-06    | 0,001562433 |
| 208079_s_at  | NM_003158 | Hs.250822  | serine/threonine kinase 6                                 | STK6      | EG1 + EG2 | 9  | 2  | 3  | 7 | 2,08E-07 | 0,002933841 | 9,97E-06    | 0,001562433 |
| 217591_at    | BF725121  | Hs.445725  | SKI-like                                                  | SKIL      | EG1 + EG2 | 9  | 2  | 7  | 3 | 2,08E-07 | 0,002933841 | 9,97E-06    | 0,001562433 |
| 218039_at    | NM_016359 | Hs.511093  | nucleolar and spindle associated protein 1                | NUSAP1    | EG1 + EG2 | 6  | 5  | 3  | 7 | 2,08E-07 | 0,002933841 | 9,97E-06    | 0,001562433 |
| 226568_at    | AI478747  | Hs.200230  |                                                           | LOC284611 | EG1 + EG2 | 9  | 2  | 5  | 5 | 2,08E-07 | 0,002933841 | 9,97E-06    | 0,001562433 |
| 226713_at    | AI247881  | Hs.478682  | chromosome 3 open reading frame 6                         | C3orf6    | EG1 + EG2 | 5  | 6  | 9  | 1 | 2,08E-07 | 0,002933841 | 9,97E-06    | 0,001562433 |

|             |           |           |                                                            |           |           |    |    |   |    |          |             |          |             |
|-------------|-----------|-----------|------------------------------------------------------------|-----------|-----------|----|----|---|----|----------|-------------|----------|-------------|
| 202095_s_at | NM_001168 | Hs.514527 | baculoviral IAP repeat-containing 5 (survivin)             | BIRC5     | EG1 + EG2 | 6  | 5  | 3 | 6  | 2,08E-07 | 0,002933841 | 8,42E-05 | 0,002977773 |
| 209408_at   | U63743    | Hs.69360  | kinesin family member 2C                                   | KIF2C     | EG1 + EG2 | 5  | 6  | 3 | 6  | 2,08E-07 | 0,002933841 | 8,42E-05 | 0,002977773 |
| 218723_s_at | NM_014059 | Hs.507866 |                                                            | RGC32     | EG1 + EG2 | 8  | 3  | 1 | 8  | 2,08E-07 | 0,002933841 | 8,42E-05 | 0,002977773 |
| 220789_s_at | NM_004749 | Hs.231411 | transforming growth factor beta regulator 4                | TBRG4     | EG1 + EG2 | 2  | 9  | 3 | 6  | 2,08E-07 | 0,002933841 | 8,42E-05 | 0,002977773 |
| 223229_at   | AB032931  | Hs.5199   | ubiquitin-conjugating enzyme E2T (putative)                | UBE2T     | EG1 + EG2 | 5  | 6  | 2 | 7  | 2,08E-07 | 0,002933841 | 8,42E-05 | 0,002977773 |
| 224566_at   | AI042152  | Hs.523789 |                                                            | TncRNA    | EG1 + EG2 | 7  | 4  | 7 | 2  | 2,08E-07 | 0,002933841 | 8,42E-05 | 0,002977773 |
| 227044_at   | AV705507  |           |                                                            |           | EG1 + EG2 | 6  | 5  | 5 | 4  | 2,08E-07 | 0,002933841 | 8,42E-05 | 0,002977773 |
| 229715_at   | AW006182  |           |                                                            |           | EG1 + EG2 | 8  | 3  | 8 | 1  | 2,08E-07 | 0,002933841 | 8,42E-05 | 0,002977773 |
| 232338_at   | AU144815  | Hs.285657 | zinc finger protein 431                                    | ZNF431    | EG1 + EG2 | 8  | 3  | 5 | 4  | 2,08E-07 | 0,002933841 | 8,42E-05 | 0,002977773 |
| 235117_at   | AI191897  | Hs.40763  | ankyrin repeat and SOCS box-containing 3                   | ASB3      | EG1 + EG2 | 9  | 2  | 7 | 2  | 2,08E-07 | 0,002933841 | 8,42E-05 | 0,002977773 |
| 204205_at   | NM_021822 | Hs.474853 | apolipoprotein B mRNA editing enzyme, catalytic poly       | APOBEC3G  | EG1 + EG2 | 0  | 10 | 8 | 8  | 2,66E-06 | 0,002933841 | 1,94E-13 | 0,001562433 |
| 204439_at   | NM_006820 | Hs.389724 | interferon-induced protein 44-like                         | IFI44L    | EG1 + EG2 | 3  | 7  | 8 | 5  | 2,66E-06 | 0,002933841 | 4,56E-09 | 0,001562433 |
| 226388_at   | AI675780  | Hs.148105 | H transcription elongation factor A (SII), 3               | TCEA3     | EG1 + EG2 | 2  | 8  | 4 | 9  | 2,66E-06 | 0,002933841 | 4,56E-09 | 0,001562433 |
| 227236_at   | AI743596  | Hs.310458 | tetraspanin 2                                              | TSPAN2    | EG1 + EG2 | 4  | 6  | 7 | 6  | 2,66E-06 | 0,002933841 | 4,56E-09 | 0,001562433 |
| 203973_s_at | NM_005195 | Hs.440829 | CCAAT/enhancer binding protein (C/EBP), delta              | CEBPD     | EG1 + EG2 | 1  | 9  | 3 | 9  | 2,66E-06 | 0,002933841 | 7,43E-08 | 0,001562433 |
| 204026_s_at | NM_007057 | Hs.42650  | ZW10 interactor                                            | ZWINT     | EG1 + EG2 | 5  | 5  | 4 | 8  | 2,66E-06 | 0,002933841 | 7,43E-08 | 0,001562433 |
| 221521_s_at | BC003186  | Hs.433180 |                                                            | Pfs2      | EG1 + EG2 | 4  | 6  | 2 | 10 | 2,66E-06 | 0,002933841 | 7,43E-08 | 0,001562433 |
| 224559_at   | AF001540  | Hs.187199 | H metastasis associated lung adenocarcinoma transcript     | MALAT1    | EG1 + EG2 | 6  | 4  | 5 | 7  | 2,66E-06 | 0,002933841 | 7,43E-08 | 0,001562433 |
| 227099_s_at | AW276078  | Hs.530443 |                                                            | LOC387763 | EG1 + EG2 | 7  | 3  | 9 | 3  | 2,66E-06 | 0,002933841 | 7,43E-08 | 0,001562433 |
| 228003_at   | AW294640  | Hs.40758  | RAB30, member RAS oncogene family                          | RAB30     | EG1 + EG2 | 10 | 0  | 5 | 7  | 2,66E-06 | 0,002933841 | 7,43E-08 | 0,001562433 |
| 230664_at   | H09657    | Hs.496530 |                                                            | MGC39900  | EG1 + EG2 | 6  | 4  | 2 | 10 | 2,66E-06 | 0,002933841 | 7,43E-08 | 0,001562433 |
| 205659_at   | NM_014707 | Hs.196054 | histone deacetylase 9                                      | HDAC9     | EG1 + EG2 | 4  | 6  | 7 | 4  | 2,66E-06 | 0,002933841 | 9,59E-07 | 0,001562433 |
| 214710_s_at | BE407516  | Hs.23960  | cyclin B1                                                  | CCNB1     | EG1 + EG2 | 5  | 5  | 4 | 7  | 2,66E-06 | 0,002933841 | 9,59E-07 | 0,001562433 |
| 227609_at   | AA633203  | Hs.546467 | epithelial stromal interaction 1 (breast)                  | EPSTI1    | EG1 + EG2 | 2  | 8  | 2 | 9  | 2,66E-06 | 0,002933841 | 9,59E-07 | 0,001562433 |
| 238013_at   | BF347859  | Hs.369123 | pleckstrin homology domain containing, family A (pho       | PLEKHA2   | EG1 + EG2 | 4  | 6  | 5 | 6  | 2,66E-06 | 0,002933841 | 9,59E-07 | 0,001562433 |
| 1553994_at  | BC015940  | Hs.153952 | 5'-nucleotidase, ecto (CD73)                               | NT5E      | EG1 + EG2 | 5  | 5  | 5 | 5  | 2,66E-06 | 0,002933841 | 9,97E-06 | 0,001562433 |
| 201250_s_at | NM_006516 | Hs.473721 | solute carrier family 2 (facilitated glucose transporter)  | SLC2A1    | EG1 + EG2 | 6  | 4  | 7 | 3  | 2,66E-06 | 0,002933841 | 9,97E-06 | 0,001562433 |
| 201291_s_at | AU159942  | Hs.156346 | topoisomerase (DNA) II alpha 170kDa                        | TOP2A     | EG1 + EG2 | 6  | 4  | 3 | 7  | 2,66E-06 | 0,002933841 | 9,97E-06 | 0,001562433 |
| 202450_s_at | NM_000396 | Hs.523594 | cathepsin K (pyncnodysostosis)                             | CTSK      | EG1 + EG2 | 0  | 10 | 9 | 1  | 2,66E-06 | 0,002933841 | 9,97E-06 | 0,001562433 |
| 207564_x_at | NM_003605 | Hs.405410 | O-linked N-acetylglucosamine (GlcNAc) transferase (U       | OGT       | EG1 + EG2 | 9  | 1  | 7 | 3  | 2,66E-06 | 0,002933841 | 9,97E-06 | 0,001562433 |
| 213158_at   | AA045174  |           |                                                            |           | EG1 + EG2 | 8  | 2  | 3 | 7  | 2,66E-06 | 0,002933841 | 9,97E-06 | 0,001562433 |
| 213527_s_at | AI095896  | Hs.301463 | zinc finger protein 688                                    | ZNF688    | EG1 + EG2 | 2  | 8  | 6 | 4  | 2,66E-06 | 0,002933841 | 9,97E-06 | 0,001562433 |
| 227404_s_at | AI459194  | Hs.326035 | early growth response 1                                    | EGR1      | EG1 + EG2 | 5  | 5  | 7 | 3  | 2,66E-06 | 0,002933841 | 9,97E-06 | 0,001562433 |
| 227510_x_at | AL037917  | Hs.187199 | H metastasis associated lung adenocarcinoma transcript     | MALAT1    | EG1 + EG2 | 7  | 3  | 5 | 5  | 2,66E-06 | 0,002933841 | 9,97E-06 | 0,001562433 |
| 205967_at   | NM_003542 | Hs.46423  | histone 1, H4c                                             | HIST1H4C  | EG1 + EG2 | 3  | 7  | 3 | 6  | 2,66E-06 | 0,002933841 | 8,42E-05 | 0,002977773 |
| 209970_x_at | M87507    | Hs.2490   | caspase 1, apoptosis-related cysteine peptidase (inter     | CASP1     | EG1 + EG2 | 2  | 8  | 7 | 2  | 2,66E-06 | 0,002933841 | 8,42E-05 | 0,002977773 |
| 210052_s_at | AF098158  | Hs.244580 | TPX2, microtubule-associated, homolog (Xenopus lae         | TPX2      | EG1 + EG2 | 5  | 5  | 3 | 6  | 2,66E-06 | 0,002933841 | 8,42E-05 | 0,002977773 |
| 213645_at   | AF305057  | Hs.180433 | enolase superfamily member 1                               | ENOSF1    | EG1 + EG2 | 8  | 2  | 6 | 3  | 2,66E-06 | 0,002933841 | 8,42E-05 | 0,002977773 |
| 215629_s_at | AA905286  | Hs.269768 |                                                            | KIAA1799  | EG1 + EG2 | 6  | 4  | 4 | 5  | 2,66E-06 | 0,002933841 | 8,42E-05 | 0,002977773 |
| 226750_at   | AI767732  | Hs.480712 | La ribonucleoprotein domain family, member 2               | LARP2     | EG1 + EG2 | 9  | 1  | 7 | 2  | 2,66E-06 | 0,002933841 | 8,42E-05 | 0,002977773 |
| 227164_at   | AL521786  | Hs.68714  | splicing factor, arginine/serine-rich 1 (splicing factor 2 | SFRS1     | EG1 + EG2 | 10 | 0  | 3 | 6  | 2,66E-06 | 0,002933841 | 8,42E-05 | 0,002977773 |
| 227961_at   | AA130998  | Hs.520898 | cathepsin B                                                | CTSB      | EG1 + EG2 | 3  | 7  | 4 | 5  | 2,66E-06 | 0,002933841 | 8,42E-05 | 0,002977773 |
| 228964_at   | AI692659  | Hs.436023 | PR domain containing 1, with ZNF domain                    | PRDM1     | EG1 + EG2 | 0  | 10 | 4 | 5  | 2,66E-06 | 0,002933841 | 8,42E-05 | 0,002977773 |
| 237400_at   | AI308101  | Hs.438489 | ATP synthase, H+ transporting, mitochondrial F0 comp       | ATP5S     | EG1 + EG2 | 4  | 6  | 5 | 4  | 2,66E-06 | 0,002933841 | 8,42E-05 | 0,002977773 |
| 242727_at   | BG032269  | Hs.25362  | ADP-ribosylation factor-like 8                             | ARL8      | EG1 + EG2 | 9  | 1  | 4 | 5  | 2,66E-06 | 0,002933841 | 8,42E-05 | 0,002977773 |

|              |           |              |                                                          |          |           |   |   |   |    |          |             |          |             |
|--------------|-----------|--------------|----------------------------------------------------------|----------|-----------|---|---|---|----|----------|-------------|----------|-------------|
| 202016_at    | NM_002402 | Hs.270978    | mesoderm specific transcript homolog (mouse)             | MEST     | EG1 + EG2 | 4 | 5 | 8 | 8  | 2,72E-05 | 0,002933841 | 1,94E-13 | 0,001562433 |
| 219304_s_at  | NM_025208 | Hs.352298    | platelet derived growth factor D                         | PDGFD    | EG1 + EG2 | 5 | 4 | 6 | 8  | 2,72E-05 | 0,002933841 | 2,17E-10 | 0,001562433 |
| 201010_s_at  | NM_006472 | Hs.533977    | thioredoxin interacting protein                          | TXNIP    | EG1 + EG2 | 2 | 7 | 7 | 6  | 2,72E-05 | 0,002933841 | 4,56E-09 | 0,001562433 |
| 201195_s_at  | AB018009  | Hs.513797    | solute carrier family 7 (cationic amino acid transporter | SLC7A5   | EG1 + EG2 | 7 | 2 | 9 | 4  | 2,72E-05 | 0,002933841 | 4,56E-09 | 0,001562433 |
| 219529_at    | NM_004669 | Hs.64746     | chloride intracellular channel 3                         | CLIC3    | EG1 + EG2 | 0 | 9 | 7 | 6  | 2,72E-05 | 0,002933841 | 4,56E-09 | 0,001562433 |
| 223220_s_at  | AF307338  | Hs.518200    | poly (ADP-ribose) polymerase family, member 9            | PARP9    | EG1 + EG2 | 1 | 8 | 4 | 9  | 2,72E-05 | 0,002933841 | 4,56E-09 | 0,001562433 |
| 225606_at    | AI949179  | Hs.469658    | BCL2-like 11 (apoptosis facilitator)                     | BCL2L11  | EG1 + EG2 | 5 | 4 | 7 | 6  | 2,72E-05 | 0,002933841 | 4,56E-09 | 0,001562433 |
| 228582_x_at  | AI475544  | Hs.187199, H | metastasis associated lung adenocarcinoma transcript     | MALAT1   | EG1 + EG2 | 6 | 3 | 4 | 9  | 2,72E-05 | 0,002933841 | 4,56E-09 | 0,001562433 |
| 201596_x_at  | NM_000224 | Hs.406013    | keratin 18                                               | KRT18    | EG1 + EG2 | 2 | 7 | 4 | 8  | 2,72E-05 | 0,002933841 | 7,43E-08 | 0,001562433 |
| 201688_s_at  | BG389015  | Hs.368433    | tumor protein D52                                        | TPD52    | EG1 + EG2 | 1 | 8 | 9 | 3  | 2,72E-05 | 0,002933841 | 7,43E-08 | 0,001562433 |
| 205807_s_at  | NM_020127 | Hs.489922    | tuftelin 1                                               | TUFT1    | EG1 + EG2 | 6 | 3 | 4 | 8  | 2,72E-05 | 0,002933841 | 7,43E-08 | 0,001562433 |
| 206085_s_at  | NM_001902 | Hs.19904     | cystathionase (cystathionine gamma-lyase)                | CTH      | EG1 + EG2 | 7 | 2 | 8 | 4  | 2,72E-05 | 0,002933841 | 7,43E-08 | 0,001562433 |
| 209765_at    | Y13786    | Hs.483944    | ADAM metallopeptidase domain 19 (meltrin beta)           | ADAM19   | EG1 + EG2 | 2 | 7 | 3 | 9  | 2,72E-05 | 0,002933841 | 7,43E-08 | 0,001562433 |
| 221841_s_at  | BF514079  | Hs.376206    | Kruppel-like factor 4 (gut)                              | KLF4     | EG1 + EG2 | 3 | 6 | 7 | 5  | 2,72E-05 | 0,002933841 | 7,43E-08 | 0,001562433 |
| 223044_at    | AL136944  | Hs.529285    | solute carrier family 40 (iron-regulated transporter),   | SLC40A1  | EG1 + EG2 | 2 | 7 | 3 | 9  | 2,72E-05 | 0,002933841 | 7,43E-08 | 0,001562433 |
| 235593_at    | AL546529  | Hs.34871     | zinc finger homeobox 1b                                  | ZFXH1B   | EG1 + EG2 | 8 | 1 | 7 | 5  | 2,72E-05 | 0,002933841 | 7,43E-08 | 0,001562433 |
| 1555860_x_at | CA430188  |              |                                                          |          | EG1 + EG2 | 8 | 1 | 8 | 3  | 2,72E-05 | 0,002933841 | 9,59E-07 | 0,001562433 |
| 1556035_s_at | AI201248  | Hs.500775    | zinc finger protein 207                                  | ZNF207   | EG1 + EG2 | 7 | 2 | 8 | 3  | 2,72E-05 | 0,002933841 | 9,59E-07 | 0,001562433 |
| 204334_at    | AA488672  | Hs.471221    | Kruppel-like factor 7 (ubiquitous)                       | KLF7     | EG1 + EG2 | 3 | 6 | 3 | 8  | 2,72E-05 | 0,002933841 | 9,59E-07 | 0,001562433 |
| 204825_at    | NM_014791 | Hs.184339    | maternal embryonic leucine zipper kinase                 | MELK     | EG1 + EG2 | 5 | 4 | 3 | 8  | 2,72E-05 | 0,002933841 | 9,59E-07 | 0,001562433 |
| 204908_s_at  | NM_005178 | Hs.31210     | B-cell CLL/lymphoma 3                                    | BCL3     | EG1 + EG2 | 7 | 2 | 4 | 7  | 2,72E-05 | 0,002933841 | 9,59E-07 | 0,001562433 |
| 205282_at    | NM_004631 | Hs.444637    | low density lipoprotein receptor-related protein 8, ap   | LRP8     | EG1 + EG2 | 7 | 2 | 5 | 6  | 2,72E-05 | 0,002933841 | 9,59E-07 | 0,001562433 |
| 206108_s_at  | NM_006275 | Hs.6891      | splicing factor, arginine/serine-rich 6                  | SFRS6    | EG1 + EG2 | 6 | 3 | 1 | 10 | 2,72E-05 | 0,002933841 | 9,59E-07 | 0,001562433 |
| 206385_s_at  | NM_020987 | Hs.499725    | ankyrin 3, node of Ranvier (ankyrin G)                   | ANK3     | EG1 + EG2 | 8 | 1 | 3 | 8  | 2,72E-05 | 0,002933841 | 9,59E-07 | 0,001562433 |
| 207563_s_at  | U77413    | Hs.405410    | O-linked N-acetylglucosamine (GlcNAc) transferase (U     | OGT      | EG1 + EG2 | 7 | 2 | 8 | 3  | 2,72E-05 | 0,002933841 | 9,59E-07 | 0,001562433 |
| 212446_s_at  | AI658534  | Hs.506829    | LAG1 longevity assurance homolog 6 (S. cerevisiae)       | LASS6    | EG1 + EG2 | 6 | 3 | 5 | 6  | 2,72E-05 | 0,002933841 | 9,59E-07 | 0,001562433 |
| 218782_s_at  | NM_014109 | Hs.370834    | ATPase family, AAA domain containing 2                   | ATAD2    | EG1 + EG2 | 8 | 1 | 4 | 7  | 2,72E-05 | 0,002933841 | 9,59E-07 | 0,001562433 |
| 223062_s_at  | BC004863  | Hs.494261    | phosphoserine aminotransferase 1                         | PSAT1    | EG1 + EG2 | 7 | 2 | 5 | 6  | 2,72E-05 | 0,002933841 | 9,59E-07 | 0,001562433 |
| 227478_at    | BF739885  | Hs.435458    | SET binding protein 1                                    | SETBP1   | EG1 + EG2 | 3 | 6 | 6 | 5  | 2,72E-05 | 0,002933841 | 9,59E-07 | 0,001562433 |
| 227618_at    | AI250910  | Hs.496303    |                                                          | FLJ44635 | EG1 + EG2 | 4 | 5 | 8 | 3  | 2,72E-05 | 0,002933841 | 9,59E-07 | 0,001562433 |
| 228390_at    | AA489100  |              |                                                          |          | EG1 + EG2 | 7 | 2 | 2 | 9  | 2,72E-05 | 0,002933841 | 9,59E-07 | 0,001562433 |
| 235476_at    | AW182459  | Hs.212957    | tripartite motif-containing 59                           | TRIM59   | EG1 + EG2 | 3 | 6 | 4 | 7  | 2,72E-05 | 0,002933841 | 9,59E-07 | 0,001562433 |
| 201292_at    | AL561834  | Hs.156346    | topoisomerase (DNA) II alpha 170kDa                      | TOP2A    | EG1 + EG2 | 6 | 3 | 4 | 6  | 2,72E-05 | 0,002933841 | 9,97E-06 | 0,001562433 |
| 201650_at    | NM_002276 | Hs.514167    | keratin 19                                               | KRT19    | EG1 + EG2 | 4 | 5 | 5 | 5  | 2,72E-05 | 0,002933841 | 9,97E-06 | 0,001562433 |
| 203158_s_at  | AF097493  | Hs.116448    | glutaminase                                              | GLS      | EG1 + EG2 | 7 | 2 | 7 | 3  | 2,72E-05 | 0,002933841 | 9,97E-06 | 0,001562433 |
| 203186_s_at  | NM_002961 | Hs.81256     | S100 calcium binding protein A4 (calcium protein, calv   | S100A4   | EG1 + EG2 | 1 | 8 | 5 | 5  | 2,72E-05 | 0,002933841 | 9,97E-06 | 0,001562433 |
| 203554_x_at  | NM_004219 | Hs.350966    | pituitary tumor-transforming 1                           | PTTG1    | EG1 + EG2 | 4 | 5 | 6 | 4  | 2,72E-05 | 0,002933841 | 9,97E-06 | 0,001562433 |
| 206114_at    | NM_004438 | Hs.371218    | EPH receptor A4                                          | EPHA4    | EG1 + EG2 | 3 | 6 | 2 | 8  | 2,72E-05 | 0,002933841 | 9,97E-06 | 0,001562433 |
| 208891_at    | BC003143  | Hs.298654    | dual specificity phosphatase 6                           | DUSP6    | EG1 + EG2 | 6 | 3 | 8 | 2  | 2,72E-05 | 0,002933841 | 9,97E-06 | 0,001562433 |
| 212706_at    | AB011110  | Hs.520599    | RAS p21 protein activator 4                              | RASA4    | EG1 + EG2 | 1 | 8 | 4 | 6  | 2,72E-05 | 0,002933841 | 9,97E-06 | 0,001562433 |
| 213629_x_at  | BF246115  | Hs.513626    | metallothionein 1F (functional)                          | MT1F     | EG1 + EG2 | 2 | 7 | 6 | 4  | 2,72E-05 | 0,002933841 | 9,97E-06 | 0,001562433 |
| 215252_at    | AW814026  | Hs.273621, H | DnaJ (Hsp40) homolog, subfamily C, member 7              | DNAJC7   | EG1 + EG2 | 7 | 2 | 6 | 4  | 2,72E-05 | 0,002933841 | 9,97E-06 | 0,001562433 |
| 216252_x_at  | Z70519    | Hs.244139    | Fas (TNF receptor superfamily, member 6)                 | FAS      | EG1 + EG2 | 4 | 5 | 8 | 2  | 2,72E-05 | 0,002933841 | 9,97E-06 | 0,001562433 |
| 218894_s_at  | NM_018048 | Hs.104650    |                                                          | FLJ10292 | EG1 + EG2 | 4 | 5 | 3 | 7  | 2,72E-05 | 0,002933841 | 9,97E-06 | 0,001562433 |
| 218921_at    | NM_021805 | Hs.501624    |                                                          | SIGIRR   | EG1 + EG2 | 0 | 9 | 1 | 9  | 2,72E-05 | 0,002933841 | 9,97E-06 | 0,001562433 |

|              |           |            |                                                         |               |           |   |   |   |   |          |             |          |             |
|--------------|-----------|------------|---------------------------------------------------------|---------------|-----------|---|---|---|---|----------|-------------|----------|-------------|
| 218983_at    | NM_016546 | Hs.525264  | complement component 1, r subcomponent-like             | C1RL          | EG1 + EG2 | 1 | 8 | 2 | 8 | 2,72E-05 | 0,002933841 | 9,97E-06 | 0,001562433 |
| 221892_at    | AK024548  | Hs.463511  | hexose-6-phosphate dehydrogenase (glucose 1-dehy        | H6PD          | EG1 + EG2 | 0 | 9 | 3 | 7 | 2,72E-05 | 0,002933841 | 9,97E-06 | 0,001562433 |
| 222217_s_at  | BC003654  | Hs.438723  | solute carrier family 27 (fatty acid transporter), memb | SLC27A3       | EG1 + EG2 | 2 | 7 | 4 | 6 | 2,72E-05 | 0,002933841 | 9,97E-06 | 0,001562433 |
| 222740_at    | AI925583  | Hs.370834  | ATPase family, AAA domain containing 2                  | ATAD2         | EG1 + EG2 | 9 | 0 | 3 | 7 | 2,72E-05 | 0,002933841 | 9,97E-06 | 0,001562433 |
| 225341_at    | BF697312  | Hs.5009    | MTERF domain containing 3                               | MTERFD3       | EG1 + EG2 | 8 | 1 | 5 | 5 | 2,72E-05 | 0,002933841 | 9,97E-06 | 0,001562433 |
| 225485_at    | AJ278890  | Hs.368315  | testis specific, 14                                     | TSGA14        | EG1 + EG2 | 5 | 4 | 3 | 7 | 2,72E-05 | 0,002933841 | 9,97E-06 | 0,001562433 |
| 226666_at    | BG434703  | Hs.19156   | dishevelled associated activator of morphogenesis 1     | DAAM1         | EG1 + EG2 | 4 | 5 | 3 | 7 | 2,72E-05 | 0,002933841 | 9,97E-06 | 0,001562433 |
| 227212_s_at  | BE544837  | Hs.460124  | PHD finger protein 19                                   | PHF19         | EG1 + EG2 | 6 | 3 | 4 | 6 | 2,72E-05 | 0,002933841 | 9,97E-06 | 0,001562433 |
| 228793_at    | BF002296  | Hs.413416, | H jumonji domain containing 1C                          | JMJD1C        | EG1 + EG2 | 7 | 2 | 7 | 3 | 2,72E-05 | 0,002933841 | 9,97E-06 | 0,001562433 |
| 229007_at    | N50864    |            |                                                         | LOC283788     | EG1 + EG2 | 5 | 4 | 6 | 4 | 2,72E-05 | 0,002933841 | 9,97E-06 | 0,001562433 |
| 229221_at    | BE467023  | Hs.502328  | CD44 antigen (homing function and Indian blood grou     | CD44          | EG1 + EG2 | 7 | 2 | 5 | 5 | 2,72E-05 | 0,002933841 | 9,97E-06 | 0,001562433 |
| 232369_at    | AF339768  | Hs.125715  | muscleblind-like 2 (Drosophila)                         | MBNL2         | EG1 + EG2 | 3 | 6 | 9 | 1 | 2,72E-05 | 0,002933841 | 9,97E-06 | 0,001562433 |
| 239487_at    | AI743261  | Hs.468140  |                                                         | DKFZP564F0522 | EG1 + EG2 | 4 | 5 | 7 | 3 | 2,72E-05 | 0,002933841 | 9,97E-06 | 0,001562433 |
| 241755_at    | AI961429  | Hs.528803  | ubiquinol-cytochrome c reductase core protein II        | UQCRC2        | EG1 + EG2 | 5 | 4 | 4 | 6 | 2,72E-05 | 0,002933841 | 9,97E-06 | 0,001562433 |
| 244871_s_at  | AW268357  | Hs.132868  | ubiquitin specific peptidase 32                         | USP32         | EG1 + EG2 | 3 | 6 | 7 | 3 | 2,72E-05 | 0,002933841 | 9,97E-06 | 0,001562433 |
| 1555419_a_at | BC016828  | Hs.527412  | N-acylsphingosine amidohydrolase (acid ceramidase)      | ASAH1         | EG1 + EG2 | 5 | 4 | 7 | 2 | 2,72E-05 | 0,002933841 | 8,42E-05 | 0,002977773 |
| 1560814_a_at | AK098781  | Hs.146520  |                                                         | MGC20481      | EG1 + EG2 | 5 | 4 | 6 | 3 | 2,72E-05 | 0,002933841 | 8,42E-05 | 0,002977773 |
| 201631_s_at  | NM_003897 | Hs.76095   | immediate early response 3                              | IER3          | EG1 + EG2 | 4 | 5 | 8 | 1 | 2,72E-05 | 0,002933841 | 8,42E-05 | 0,002977773 |
| 201664_at    | AL136877  | Hs.58992   | SMC4 structural maintenance of chromosomes 4-like 1     | SMC4L1        | EG1 + EG2 | 7 | 2 | 4 | 5 | 2,72E-05 | 0,002933841 | 8,42E-05 | 0,002977773 |
| 202022_at    | NM_005165 | Hs.155247  | aldolase C, fructose-bisphosphate                       | ALDOC         | EG1 + EG2 | 1 | 8 | 5 | 4 | 2,72E-05 | 0,002933841 | 8,42E-05 | 0,002977773 |
| 202668_at    | BF001670  | Hs.149239  | ephrin-B2                                               | EFNB2         | EG1 + EG2 | 7 | 2 | 2 | 7 | 2,72E-05 | 0,002933841 | 8,42E-05 | 0,002977773 |
| 203868_s_at  | NM_001078 | Hs.109225  | vascular cell adhesion molecule 1                       | VCAM1         | EG1 + EG2 | 6 | 3 | 5 | 4 | 2,72E-05 | 0,002933841 | 8,42E-05 | 0,002977773 |
| 204768_s_at  | NM_004111 | Hs.409065  | flap structure-specific endonuclease 1                  | FEN1          | EG1 + EG2 | 4 | 5 | 4 | 5 | 2,72E-05 | 0,002933841 | 8,42E-05 | 0,002977773 |
| 205691_at    | NM_004209 | Hs.435277  | synaptogyrin 3                                          | SYNGR3        | EG1 + EG2 | 2 | 7 | 6 | 3 | 2,72E-05 | 0,002933841 | 8,42E-05 | 0,002977773 |
| 205842_s_at  | AF001362  | Hs.434374  | Janus kinase 2 (a protein tyrosine kinase)              | JAK2          | EG1 + EG2 | 6 | 3 | 4 | 5 | 2,72E-05 | 0,002933841 | 8,42E-05 | 0,002977773 |
| 210461_s_at  | BC002448  | Hs.438236, | H actin binding LIM protein 1                           | ABLIM1        | EG1 + EG2 | 2 | 7 | 2 | 7 | 2,72E-05 | 0,002933841 | 8,42E-05 | 0,002977773 |
| 213693_s_at  | AI610869  | Hs.89603   | mucin 1, transmembrane                                  | MUC1          | EG1 + EG2 | 1 | 8 | 0 | 9 | 2,72E-05 | 0,002933841 | 8,42E-05 | 0,002977773 |
| 214290_s_at  | AI313324  | Hs.530461  | histone 2, H2aa                                         | HIST2H2AA     | EG1 + EG2 | 4 | 5 | 4 | 5 | 2,72E-05 | 0,002933841 | 8,42E-05 | 0,002977773 |
| 218793_s_at  | NM_006746 | Hs.109655  | sex comb on midleg-like 1 (Drosophila)                  | SCML1         | EG1 + EG2 | 9 | 0 | 3 | 6 | 2,72E-05 | 0,002933841 | 8,42E-05 | 0,002977773 |
| 219787_s_at  | NM_018098 | Hs.518299  | epithelial cell transforming sequence 2 oncogene        | ECT2          | EG1 + EG2 | 6 | 3 | 4 | 5 | 2,72E-05 | 0,002933841 | 8,42E-05 | 0,002977773 |
| 221750_at    | BG035985  | Hs.397729  | 3-hydroxy-3-methylglutaryl-Coenzyme A synthase 1 (s     | HMGCS1        | EG1 + EG2 | 7 | 2 | 6 | 3 | 2,72E-05 | 0,002933841 | 8,42E-05 | 0,002977773 |
| 221823_at    | AL565741  | Hs.482976  |                                                         | LOC90355      | EG1 + EG2 | 9 | 0 | 6 | 3 | 2,72E-05 | 0,002933841 | 8,42E-05 | 0,002977773 |
| 222077_s_at  | AU153848  | Hs.505469  | Rac GTPase activating protein 1                         | RACGAP1       | EG1 + EG2 | 4 | 5 | 3 | 6 | 2,72E-05 | 0,002933841 | 8,42E-05 | 0,002977773 |
| 224753_at    | BE614410  | Hs.434886  | cell division cycle associated 5                        | CDCA5         | EG1 + EG2 | 5 | 4 | 3 | 6 | 2,72E-05 | 0,002933841 | 8,42E-05 | 0,002977773 |
| 225521_at    | AL137586  | Hs.529280  | anaphase promoting complex subunit 7                    | ANAPC7        | EG1 + EG2 | 4 | 5 | 5 | 4 | 2,72E-05 | 0,002933841 | 8,42E-05 | 0,002977773 |
| 226333_at    | AV700030  | Hs.135087  | interleukin 6 receptor                                  | IL6R          | EG1 + EG2 | 3 | 6 | 3 | 6 | 2,72E-05 | 0,002933841 | 8,42E-05 | 0,002977773 |
| 226350_at    | AU155565  | Hs.409081, | H opsin 3 (encephalopsin, panopsin)                     | OPN3          | EG1 + EG2 | 7 | 2 | 3 | 6 | 2,72E-05 | 0,002933841 | 8,42E-05 | 0,002977773 |
| 226936_at    | BG492359  | Hs.486401  | chromosome 6 open reading frame 173                     | C6orf173      | EG1 + EG2 | 4 | 5 | 2 | 7 | 2,72E-05 | 0,002933841 | 8,42E-05 | 0,002977773 |
| 227606_s_at  | AI638611  | Hs.16229   |                                                         | AMSH-LP       | EG1 + EG2 | 5 | 4 | 5 | 4 | 2,72E-05 | 0,002933841 | 8,42E-05 | 0,002977773 |
| 228729_at    | N90191    | Hs.23960   | cyclin B1                                               | CCNB1         | EG1 + EG2 | 6 | 3 | 4 | 5 | 2,72E-05 | 0,002933841 | 8,42E-05 | 0,002977773 |
| 229704_at    | BF111072  | Hs.369263, | H androgen-induced proliferation inhibitor              | APRIN         | EG1 + EG2 | 6 | 3 | 7 | 2 | 2,72E-05 | 0,002933841 | 8,42E-05 | 0,002977773 |
| 230505_at    | AU158212  | Hs.85077   |                                                         | LOC145474     | EG1 + EG2 | 4 | 5 | 7 | 2 | 2,72E-05 | 0,002933841 | 8,42E-05 | 0,002977773 |
| 231769_at    | AF129536  | Hs.464419  | F-box protein 6                                         | FBXO6         | EG1 + EG2 | 3 | 6 | 4 | 5 | 2,72E-05 | 0,002933841 | 8,42E-05 | 0,002977773 |
| 232194_at    | AA764787  | Hs.126888  | methyltransferase like 4                                | METTL4        | EG1 + EG2 | 7 | 2 | 3 | 6 | 2,72E-05 | 0,002933841 | 8,42E-05 | 0,002977773 |
| 235693_at    | D81004    |            |                                                         |               | EG1 + EG2 | 0 | 9 | 6 | 3 | 2,72E-05 | 0,002933841 | 8,42E-05 | 0,002977773 |

|             |           |                      |                                                         |           |           |   |   |    |    |                        |             |             |             |
|-------------|-----------|----------------------|---------------------------------------------------------|-----------|-----------|---|---|----|----|------------------------|-------------|-------------|-------------|
| 236364_at   | AA156297  |                      |                                                         |           | EG1 + EG2 | 2 | 7 | 5  | 4  | 2,72E-05               | 0,002933841 | 8,42E-05    | 0,002977773 |
| 241769_at   | AW962458  | Hs.436873            | integrin, alpha V (vitronectin receptor, alpha polypept | ITGAV     | EG1 + EG2 | 3 | 6 | 6  | 3  | 2,72E-05               | 0,002933841 | 8,42E-05    | 0,002977773 |
| 242471_at   | AI916641  |                      |                                                         |           | EG1 + EG2 | 5 | 4 | 7  | 2  | 2,72E-05               | 0,002933841 | 8,42E-05    | 0,002977773 |
| 204748_at   | NM_000963 | Hs.196384            | prostaglandin-endoperoxide synthase 2 (prostaglandi     | PTGS2     | EG2       | 1 | 7 | 8  | 6  | 0,0002234990,008816118 | 2,17E-10    | 0,001562433 |             |
| 201340_s_at | AF010314  | Hs.104925            | ectodermal-neural cortex (with BTB-like domain)         | ENC1      | EG2       | 6 | 2 | 9  | 4  | 0,0002234990,008816118 | 4,56E-09    | 0,001562433 |             |
| 201867_s_at | AW968555  | Hs.495656            | transducin (beta)-like 1X-linked                        | TBL1X     | EG2       | 2 | 6 | 6  | 7  | 0,0002234990,008816118 | 4,56E-09    | 0,001562433 |             |
| 204529_s_at | AI961231  | Hs.491805            |                                                         | TOX       | EG2       | 6 | 2 | 4  | 9  | 0,0002234990,008816118 | 4,56E-09    | 0,001562433 |             |
| 204612_at   | NM_006823 | Hs.433700            | protein kinase (cAMP-dependent, catalytic) inhibitor    | PKIA      | EG2       | 4 | 4 | 8  | 5  | 0,0002234990,008816118 | 4,56E-09    | 0,001562433 |             |
| 210299_s_at | AF063002  | Hs.435369            | four and a half LIM domains 1                           | FHL1      | EG2       | 3 | 5 | 1  | 12 | 0,0002234990,008816118 | 4,56E-09    | 0,001562433 |             |
| 226610_at   | AA722878  | Hs.433422            | proline rich 6                                          | PRR6      | EG2       | 7 | 1 | 5  | 8  | 0,0002234990,008816118 | 4,56E-09    | 0,001562433 |             |
| 238599_at   | AI168124  | Hs.556018            | interleukin-1 receptor-associated kinase 1 binding pro  | IRAK1BP1  | EG2       | 3 | 5 | 3  | 10 | 0,0002234990,008816118 | 4,56E-09    | 0,001562433 |             |
| 201313_at   | NM_001975 | Hs.511915            | enolase 2 (gamma, neuronal)                             | ENO2      | EG2       | 2 | 6 | 5  | 7  | 0,0002234990,008816118 | 7,43E-08    | 0,001562433 |             |
| 202086_at   | NM_002462 | Hs.517307            | myxovirus (influenza virus) resistance 1, interferon-in | MX1       | EG2       | 1 | 7 | 2  | 10 | 0,0002234990,008816118 | 7,43E-08    | 0,001562433 |             |
| 202291_s_at | NM_000900 | Hs.365706            | matrix Gla protein                                      | MGP       | EG2       | 2 | 6 | 4  | 8  | 0,0002234990,008816118 | 7,43E-08    | 0,001562433 |             |
| 204279_at   | NM_002800 | Hs.381081            | proteasome (prosome, macropain) subunit, beta type      | PSMB9     | EG2       | 3 | 5 | 4  | 8  | 0,0002234990,008816118 | 7,43E-08    | 0,001562433 |             |
| 204457_s_at | NM_002048 | Hs.65029             | growth arrest-specific 1                                | GAS1      | EG2       | 3 | 5 | 6  | 6  | 0,0002234990,008816118 | 7,43E-08    | 0,001562433 |             |
| 207826_s_at | NM_002167 | Hs.76884             | inhibitor of DNA binding 3, dominant negative helix-l   | ID3       | EG2       | 6 | 2 | 6  | 6  | 0,0002234990,008816118 | 7,43E-08    | 0,001562433 |             |
| 208442_s_at | NM_000051 | Hs.435561            | ataxia telangiectasia mutated (includes complementa     | ATM       | EG2       | 7 | 1 | 7  | 5  | 0,0002234990,008816118 | 7,43E-08    | 0,001562433 |             |
| 210095_s_at | M31159    | Hs.450230            | insulin-like growth factor binding protein 3            | IGFBP3    | EG2       | 4 | 4 | 8  | 4  | 0,0002234990,008816118 | 7,43E-08    | 0,001562433 |             |
| 214731_at   | AB037854  | Hs.485899            | CTTNBP2 N-terminal like                                 | CTTNBP2NL | EG2       | 5 | 3 | 11 | 1  | 0,0002234990,008816118 | 7,43E-08    | 0,001562433 |             |
| 218486_at   | AA149594  | Hs.12229             | Kruppel-like factor 11                                  | KLF11     | EG2       | 7 | 1 | 7  | 5  | 0,0002234990,008816118 | 7,43E-08    | 0,001562433 |             |
| 223578_x_at | AF113016  | Hs.187199, Hs.556259 |                                                         | PRO1073   | EG2       | 5 | 3 | 7  | 5  | 0,0002234990,008816118 | 7,43E-08    | 0,001562433 |             |
| 227449_at   | AI799018  | Hs.371218            | EPH receptor A4                                         | EPHA4     | EG2       | 4 | 4 | 4  | 8  | 0,0002234990,008816118 | 7,43E-08    | 0,001562433 |             |
| 229899_s_at | AI625235  | Hs.356766, Hs.401929 |                                                         | HSUP1     | EG2       | 8 | 0 | 4  | 8  | 0,0002234990,008816118 | 7,43E-08    | 0,001562433 |             |
| 242273_at   | AA747287  |                      |                                                         |           | EG2       | 5 | 3 | 3  | 9  | 0,0002234990,008816118 | 7,43E-08    | 0,001562433 |             |
| 203628_at   | H05812    | Hs.20573             | insulin-like growth factor 1 receptor                   | IGF1R     | EG2       | 3 | 5 | 1  | 10 | 0,0002234990,008816118 | 9,59E-07    | 0,001562433 |             |
| 203919_at   | NM_003195 | Hs.505004            | transcription elongation factor A (SII), 2              | TCEA2     | EG2       | 0 | 8 | 2  | 9  | 0,0002234990,008816118 | 9,59E-07    | 0,001562433 |             |
| 204415_at   | NM_022873 | Hs.523847            | interferon, alpha-inducible protein (clone IFI-6-16)    | G1P3      | EG2       | 0 | 8 | 3  | 8  | 0,0002234990,008816118 | 9,59E-07    | 0,001562433 |             |
| 209031_at   | AL519710  | Hs.370510            | immunoglobulin superfamily, member 4                    | IGSF4     | EG2       | 3 | 5 | 9  | 2  | 0,0002234990,008816118 | 9,59E-07    | 0,001562433 |             |
| 213164_at   | AI867198  | Hs.302742            | mitochondrial ribosomal protein S6                      | MRPS6     | EG2       | 6 | 2 | 11 | 0  | 0,0002234990,008816118 | 9,59E-07    | 0,001562433 |             |
| 213459_at   | AU155515  | Hs.433701            | ribosomal protein L37a                                  | RPL37A    | EG2       | 7 | 1 | 5  | 6  | 0,0002234990,008816118 | 9,59E-07    | 0,001562433 |             |
| 214995_s_at | BF508948  | Hs.24656             | KIAA0907                                                | KIAA0907  | EG2       | 2 | 6 | 5  | 6  | 0,0002234990,008816118 | 9,59E-07    | 0,001562433 |             |
| 224724_at   | AL133001  | Hs.162016            | sulfatase 2                                             | SULF2     | EG2       | 0 | 8 | 7  | 4  | 0,0002234990,008816118 | 9,59E-07    | 0,001562433 |             |
| 226876_at   | AI961778  | Hs.345588            |                                                         | MGC45871  | EG2       | 1 | 7 | 6  | 5  | 0,0002234990,008816118 | 9,59E-07    | 0,001562433 |             |
| 228846_at   | AW071793  | Hs.468908            | MAX dimerization protein 1                              | MXD1      | EG2       | 7 | 1 | 8  | 3  | 0,0002234990,008816118 | 9,59E-07    | 0,001562433 |             |
| 229072_at   | BF968097  |                      |                                                         |           | EG2       | 6 | 2 | 1  | 10 | 0,0002234990,008816118 | 9,59E-07    | 0,001562433 |             |
| 232914_s_at | AB046817  | Hs.369520            | synaptotagmin-like 2                                    | SYTL2     | EG2       | 4 | 4 | 6  | 5  | 0,0002234990,008816118 | 9,59E-07    | 0,001562433 |             |
| 238931_at   | AL045793  | Hs.224187            |                                                         | LOC284009 | EG2       | 5 | 3 | 5  | 6  | 0,0002234990,008816118 | 9,59E-07    | 0,001562433 |             |
| 244766_at   | BG180003  | Hs.444600, Hs.460558 |                                                         | LAT1-3TM  | EG2       | 6 | 2 | 8  | 3  | 0,0002234990,008816118 | 9,59E-07    | 0,001562433 |             |
| 201169_s_at | BG326045  | Hs.171825            | basic helix-loop-helix domain containing, class B, 2    | BHLHB2    | EG2       | 5 | 3 | 7  | 3  | 0,0002234990,008816118 | 9,97E-06    | 0,001562433 |             |
| 201925_s_at | NM_000574 | Hs.527653            | decay accelerating factor for complement (CD55, Cro     | DAF       | EG2       | 5 | 3 | 4  | 6  | 0,0002234990,008816118 | 9,97E-06    | 0,001562433 |             |
| 202479_s_at | BC002637  | Hs.467751            | tribbles homolog 2 (Drosophila)                         | TRIB2     | EG2       | 3 | 5 | 5  | 5  | 0,0002234990,008816118 | 9,97E-06    | 0,001562433 |             |
| 202748_at   | NM_004120 | Hs.386567            | guanylate binding protein 2, interferon-inducible       | GBP2      | EG2       | 0 | 8 | 1  | 9  | 0,0002234990,008816118 | 9,97E-06    | 0,001562433 |             |
| 203716_s_at | M80536    | Hs.368912            | dipeptidylpeptidase 4 (CD26, adenosine deaminase c      | DPP4      | EG2       | 4 | 4 | 3  | 7  | 0,0002234990,008816118 | 9,97E-06    | 0,001562433 |             |
| 203764_at   | NM_014750 | Hs.77695             | discs, large homolog 7 (Drosophila)                     | DLG7      | EG2       | 5 | 3 | 3  | 7  | 0,0002234990,008816118 | 9,97E-06    | 0,001562433 |             |

|              |           |            |                                                             |           |     |   |   |   |   |                        |          |             |
|--------------|-----------|------------|-------------------------------------------------------------|-----------|-----|---|---|---|---|------------------------|----------|-------------|
| 204784_s_at  | NM_022443 | Hs.85195   | myeloid leukemia factor 1                                   | MLF1      | EG2 | 6 | 2 | 8 | 2 | 0,0002234990,008816118 | 9,97E-06 | 0,001562433 |
| 206448_at    | NM_014951 | Hs.22653   | zinc finger protein 365                                     | ZNF365    | EG2 | 3 | 5 | 5 | 5 | 0,0002234990,008816118 | 9,97E-06 | 0,001562433 |
| 208892_s_at  | BC003143  | Hs.298654  | dual specificity phosphatase 6                              | DUSP6     | EG2 | 5 | 3 | 9 | 1 | 0,0002234990,008816118 | 9,97E-06 | 0,001562433 |
| 209184_s_at  | BF700086  | Hs.442344  | insulin receptor substrate 2                                | IRS2      | EG2 | 6 | 2 | 2 | 8 | 0,0002234990,008816118 | 9,97E-06 | 0,001562433 |
| 209238_at    | BE966922  | Hs.530733  | syntaxin 3A                                                 | STX3A     | EG2 | 4 | 4 | 9 | 1 | 0,0002234990,008816118 | 9,97E-06 | 0,001562433 |
| 210512_s_at  | AF022375  | Hs.73793   | vascular endothelial growth factor                          | VEGF      | EG2 | 4 | 4 | 9 | 1 | 0,0002234990,008816118 | 9,97E-06 | 0,001562433 |
| 213222_at    | AL049593  | Hs.431173  | phospholipase C, beta 1 (phosphoinositide-specific)         | PLCB1     | EG2 | 5 | 3 | 3 | 7 | 0,0002234990,008816118 | 9,97E-06 | 0,001562433 |
| 213226_at    | AI346350  | Hs.91728   | exosome component 9                                         | EXOSC9    | EG2 | 6 | 2 | 4 | 6 | 0,0002234990,008816118 | 9,97E-06 | 0,001562433 |
| 216041_x_at  | AK023348  | Hs.514220  | granulin                                                    | GRN       | EG2 | 0 | 8 | 8 | 2 | 0,0002234990,008816118 | 9,97E-06 | 0,001562433 |
| 216894_x_at  | D64137    | Hs.106070  | cyclin-dependent kinase inhibitor 1C (p57, Kip2)            | CDKN1C    | EG2 | 6 | 2 | 4 | 6 | 0,0002234990,008816118 | 9,97E-06 | 0,001562433 |
| 219024_at    | NM_021622 | Hs.287830  | pleckstrin homology domain containing, family A (pho        | PLEKHA1   | EG2 | 4 | 4 | 8 | 2 | 0,0002234990,008816118 | 9,97E-06 | 0,001562433 |
| 220739_s_at  | NM_017623 | Hs.150895  | cyclin M3                                                   | CNNM3     | EG2 | 0 | 8 | 7 | 3 | 0,0002234990,008816118 | 9,97E-06 | 0,001562433 |
| 221484_at    | BF691447  | Hs.370487  | UDP-Gal:betaGlcNAc beta 1,4- galactosyltransferase, p       | B4GALT5   | EG2 | 5 | 3 | 7 | 3 | 0,0002234990,008816118 | 9,97E-06 | 0,001562433 |
| 224428_s_at  | AY029179  | Hs.470654  | cell division cycle associated 7                            | CDCA7     | EG2 | 5 | 3 | 3 | 7 | 0,0002234990,008816118 | 9,97E-06 | 0,001562433 |
| 225123_at    | BE883841  | Hs.120633  | sestrin 3                                                   | SESN3     | EG2 | 6 | 2 | 6 | 4 | 0,0002234990,008816118 | 9,97E-06 | 0,001562433 |
| 227004_at    | AI611074  | Hs.435570  | cyclin-dependent kinase-like 5                              | CDKL5     | EG2 | 5 | 3 | 4 | 6 | 0,0002234990,008816118 | 9,97E-06 | 0,001562433 |
| 227856_at    | AI110850  | Hs.23439   |                                                             | FLJ39370  | EG2 | 5 | 3 | 6 | 4 | 0,0002234990,008816118 | 9,97E-06 | 0,001562433 |
| 228157_at    | AI125646  | Hs.500775  | zinc finger protein 207                                     | ZNF207    | EG2 | 7 | 1 | 6 | 4 | 0,0002234990,008816118 | 9,97E-06 | 0,001562433 |
| 235197_s_at  | AV713913  | Hs.226780  | osteopetrosis associated transmembrane protein 1            | OSTM1     | EG2 | 7 | 1 | 8 | 2 | 0,0002234990,008816118 | 9,97E-06 | 0,001562433 |
| 238623_at    | AI633559  | Hs.390428  | mitogen-activated protein kinase kinase kinase 4            | MAP3K4    | EG2 | 7 | 1 | 9 | 1 | 0,0002234990,008816118 | 9,97E-06 | 0,001562433 |
| 241036_at    | AA215451  | Hs.477898  | Hermansky-Pudlak syndrome 3                                 | HPS3      | EG2 | 6 | 2 | 8 | 2 | 0,0002234990,008816118 | 9,97E-06 | 0,001562433 |
| 242134_at    | AI733194  |            |                                                             |           | EG2 | 8 | 0 | 3 | 7 | 0,0002234990,008816118 | 9,97E-06 | 0,001562433 |
| 45714_at     | AA436930  | Hs.412304, | H host cell factor C1 regulator 1 (XPO1 dependant)          | HCFC1R1   | EG2 | 0 | 8 | 4 | 6 | 0,0002234990,008816118 | 9,97E-06 | 0,001562433 |
| 1552619_a_at | NM_018685 | Hs.62180   | anillin, actin binding protein (scraps homolog, Drosop      | ANLN      | EG2 | 6 | 2 | 3 | 6 | 0,0002234990,008816118 | 8,42E-05 | 0,002977773 |
| 1555486_a_at | BC008922  | Hs.19987   |                                                             | FLJ14213  | EG2 | 0 | 8 | 7 | 2 | 0,0002234990,008816118 | 8,42E-05 | 0,002977773 |
| 1555978_s_at | AW467415  | Hs.233936  |                                                             | LOC440476 | EG2 | 5 | 3 | 4 | 5 | 0,0002234990,008816118 | 8,42E-05 | 0,002977773 |
| 1559094_at   | AK095307  | Hs.216653  | F-box protein 9                                             | FBXO9     | EG2 | 6 | 2 | 6 | 3 | 0,0002234990,008816118 | 8,42E-05 | 0,002977773 |
| 1559190_s_at | AL833150  | Hs.327631  | retinol dehydrogenase 13 (all-trans and 9-cis)              | RDH13     | EG2 | 3 | 5 | 1 | 8 | 0,0002234990,008816118 | 8,42E-05 | 0,002977773 |
| 200632_s_at  | NM_006096 | Hs.372914  | N-myc downstream regulated gene 1                           | NDRG1     | EG2 | 1 | 7 | 5 | 4 | 0,0002234990,008816118 | 8,42E-05 | 0,002977773 |
| 200678_x_at  | NM_002087 | Hs.514220  | granulin                                                    | GRN       | EG2 | 0 | 8 | 7 | 2 | 0,0002234990,008816118 | 8,42E-05 | 0,002977773 |
| 201282_at    | NM_002541 | Hs.488181  | oxoglutarate (alpha-ketoglutarate) dehydrogenase (li        | OGDH      | EG2 | 4 | 4 | 5 | 4 | 0,0002234990,008816118 | 8,42E-05 | 0,002977773 |
| 202499_s_at  | NM_006931 | Hs.210227, | H solute carrier family 2 (facilitated glucose transporter) | SLC2A3    | EG2 | 4 | 4 | 5 | 4 | 0,0002234990,008816118 | 8,42E-05 | 0,002977773 |
| 203017_s_at  | R52678    | Hs.22587   | synovial sarcoma, X breakpoint 2 interacting protein        | SSX2IP    | EG2 | 7 | 1 | 7 | 2 | 0,0002234990,008816118 | 8,42E-05 | 0,002977773 |
| 203037_s_at  | NM_014751 | Hs.336994  | metastasis suppressor 1                                     | MTSS1     | EG2 | 2 | 6 | 8 | 1 | 0,0002234990,008816118 | 8,42E-05 | 0,002977773 |
| 203213_at    | AL524035  | Hs.334562  | cell division cycle 2, G1 to S and G2 to M                  | CDC2      | EG2 | 5 | 3 | 3 | 6 | 0,0002234990,008816118 | 8,42E-05 | 0,002977773 |
| 203276_at    | NM_005573 | Hs.89497   | lamin B1                                                    | LMNB1     | EG2 | 6 | 2 | 2 | 7 | 0,0002234990,008816118 | 8,42E-05 | 0,002977773 |
| 203755_at    | NM_001211 | Hs.36708   | BUB1 budding uninhibited by benzimidazoles 1 homol          | BUB1B     | EG2 | 5 | 3 | 3 | 6 | 0,0002234990,008816118 | 8,42E-05 | 0,002977773 |
| 204507_s_at  | NM_000945 | Hs.280604  | protein phosphatase 3 (formerly 2B), regulatory subu        | PPP3R1    | EG2 | 5 | 3 | 5 | 4 | 0,0002234990,008816118 | 8,42E-05 | 0,002977773 |
| 204510_at    | NM_003503 | Hs.533573  | CDC7 cell division cycle 7 (S. cerevisiae)                  | CDC7      | EG2 | 5 | 3 | 4 | 5 | 0,0002234990,008816118 | 8,42E-05 | 0,002977773 |
| 205171_at    | NM_002830 | Hs.469809  | protein tyrosine phosphatase, non-receptor type 4 (m        | PTPN4     | EG2 | 5 | 3 | 7 | 2 | 0,0002234990,008816118 | 8,42E-05 | 0,002977773 |
| 205339_at    | NM_003035 | Hs.525198  | TAL1 (SCL) interrupting locus                               | SIL       | EG2 | 5 | 3 | 3 | 6 | 0,0002234990,008816118 | 8,42E-05 | 0,002977773 |
| 206011_at    | AI719655  | Hs.2490    | caspase 1, apoptosis-related cysteine peptidase (inter      | CASP1     | EG2 | 2 | 6 | 7 | 2 | 0,0002234990,008816118 | 8,42E-05 | 0,002977773 |
| 208070_s_at  | NM_002912 | Hs.232021  | REV3-like, catalytic subunit of DNA polymerase zeta (y      | REV3L     | EG2 | 6 | 2 | 2 | 7 | 0,0002234990,008816118 | 8,42E-05 | 0,002977773 |
| 209267_s_at  | AB040120  | Hs.288034  | solute carrier family 39 (zinc transporter), member 8       | SLC39A8   | EG2 | 2 | 6 | 1 | 8 | 0,0002234990,008816118 | 8,42E-05 | 0,002977773 |
| 210559_s_at  | D88357    | Hs.334562  | cell division cycle 2, G1 to S and G2 to M                  | CDC2      | EG2 | 6 | 2 | 3 | 6 | 0,0002234990,008816118 | 8,42E-05 | 0,002977773 |

|             |           |                      |                                                         |          |     |   |   |    |    |                        |          |             |
|-------------|-----------|----------------------|---------------------------------------------------------|----------|-----|---|---|----|----|------------------------|----------|-------------|
| 211991_s_at | M27487    | Hs.347270            | major histocompatibility complex, class II, DP alpha 1  | HLA-DPA1 | EG2 | 2 | 6 | 7  | 2  | 0,0002234990,008816118 | 8,42E-05 | 0,002977773 |
| 212141_at   | AA604621  | Hs.460184            | MCM4 minichromosome maintenance deficient 4 (S. c       | MCM4     | EG2 | 4 | 4 | 4  | 5  | 0,0002234990,008816118 | 8,42E-05 | 0,002977773 |
| 212188_at   | AA551075  | Hs.109438            | potassium channel tetramerisation domain containing     | KCTD12   | EG2 | 4 | 4 | 2  | 7  | 0,0002234990,008816118 | 8,42E-05 | 0,002977773 |
| 212822_at   | AA121502  | Hs.477420            | HEG homolog 1 (zebrafish)                               | HEG1     | EG2 | 3 | 5 | 7  | 2  | 0,0002234990,008816118 | 8,42E-05 | 0,002977773 |
| 213046_at   | AI130920  | Hs.117176            | poly(A) binding protein, nuclear 1                      | PABPN1   | EG2 | 7 | 1 | 5  | 4  | 0,0002234990,008816118 | 8,42E-05 | 0,002977773 |
| 213906_at   | AW592266  | Hs.445898            | v-myb myeloblastosis viral oncogene homolog (avian)     | MYBL1    | EG2 | 6 | 2 | 4  | 5  | 0,0002234990,008816118 | 8,42E-05 | 0,002977773 |
| 214012_at   | BE551138  | Hs.436186, Hs.440961 |                                                         | ARTS-1   | EG2 | 5 | 3 | 2  | 7  | 0,0002234990,008816118 | 8,42E-05 | 0,002977773 |
| 215388_s_at | X56210    | Hs.154224            | complement factor H-related 1 pseudogene                | CFHL1P   | EG2 | 1 | 7 | 4  | 5  | 0,0002234990,008816118 | 8,42E-05 | 0,002977773 |
| 217627_at   | BE515346  | Hs.290703            | zinc finger protein 573                                 | ZNF573   | EG2 | 4 | 4 | 2  | 7  | 0,0002234990,008816118 | 8,42E-05 | 0,002977773 |
| 217966_s_at | NM_022083 | Hs.518662            | chromosome 1 open reading frame 24                      | C1orf24  | EG2 | 3 | 5 | 5  | 4  | 0,0002234990,008816118 | 8,42E-05 | 0,002977773 |
| 218308_at   | NM_006342 | Hs.104019            | transforming, acidic coiled-coil containing protein 3   | TACC3    | EG2 | 4 | 4 | 2  | 7  | 0,0002234990,008816118 | 8,42E-05 | 0,002977773 |
| 218755_at   | NM_005733 | Hs.73625             | kinesin family member 20A                               | KIF20A   | EG2 | 5 | 3 | 2  | 7  | 0,0002234990,008816118 | 8,42E-05 | 0,002977773 |
| 220987_s_at | NM_030952 | Hs.497512            | NUAK family, SNF1-like kinase, 2                        | NUAK2    | EG2 | 7 | 1 | 4  | 5  | 0,0002234990,008816118 | 8,42E-05 | 0,002977773 |
| 222439_s_at | BE967048  | Hs.160211            | thyroid hormone receptor associated protein 3           | THRAP3   | EG2 | 1 | 7 | 5  | 4  | 0,0002234990,008816118 | 8,42E-05 | 0,002977773 |
| 222608_s_at | AK023208  | Hs.62180             | anillin, actin binding protein (scraps homolog, Drosop  | ANLN     | EG2 | 6 | 2 | 2  | 7  | 0,0002234990,008816118 | 8,42E-05 | 0,002977773 |
| 223307_at   | BC002551  | Hs.524216            | cell division cycle associated 3                        | CDCA3    | EG2 | 4 | 4 | 2  | 7  | 0,0002234990,008816118 | 8,42E-05 | 0,002977773 |
| 223940_x_at | AF132202  | Hs.187199, H         | metastasis associated lung adenocarcinoma transcript    | MALAT1   | EG2 | 6 | 2 | 5  | 4  | 0,0002234990,008816118 | 8,42E-05 | 0,002977773 |
| 225875_s_at | T84558    | Hs.523442            | NIPA-like domain containing 3                           | NPAL3    | EG2 | 2 | 6 | 4  | 5  | 0,0002234990,008816118 | 8,42E-05 | 0,002977773 |
| 227100_at   | AI569766  | Hs.13205             |                                                         | B3GTL    | EG2 | 4 | 4 | 6  | 3  | 0,0002234990,008816118 | 8,42E-05 | 0,002977773 |
| 227517_s_at | AI056992  | Hs.531856            | growth arrest-specific 5                                | GAS5     | EG2 | 8 | 0 | 5  | 4  | 0,0002234990,008816118 | 8,42E-05 | 0,002977773 |
| 228049_x_at | AA523172  |                      |                                                         |          | EG2 | 6 | 2 | 3  | 6  | 0,0002234990,008816118 | 8,42E-05 | 0,002977773 |
| 228937_at   | AI659800  | Hs.210586            |                                                         | FLJ38725 | EG2 | 5 | 3 | 3  | 6  | 0,0002234990,008816118 | 8,42E-05 | 0,002977773 |
| 229943_at   | BF939833  | Hs.436922            | ret finger protein 2                                    | RFP2     | EG2 | 3 | 5 | 5  | 4  | 0,0002234990,008816118 | 8,42E-05 | 0,002977773 |
| 230180_at   | AA521056  | Hs.528305            | DEAD (Asp-Glu-Ala-Asp) box polypeptide 17               | DDX17    | EG2 | 4 | 4 | 3  | 6  | 0,0002234990,008816118 | 8,42E-05 | 0,002977773 |
| 230560_at   | N21096    | Hs.508958            | syntaxin binding protein 6 (amisyn)                     | STXBP6   | EG2 | 1 | 7 | 3  | 6  | 0,0002234990,008816118 | 8,42E-05 | 0,002977773 |
| 231042_s_at | AA809487  | Hs.144114            | calcium/calmodulin-dependent protein kinase (CaM k      | CAMK2D   | EG2 | 7 | 1 | 3  | 6  | 0,0002234990,008816118 | 8,42E-05 | 0,002977773 |
| 231817_at   | H25097    | Hs.431081            | ubiquitin specific peptidase 53                         | USP53    | EG2 | 8 | 0 | 2  | 7  | 0,0002234990,008816118 | 8,42E-05 | 0,002977773 |
| 231863_at   | AF161419  | Hs.489811            | inhibitor of growth family, member 3                    | ING3     | EG2 | 6 | 2 | 6  | 3  | 0,0002234990,008816118 | 8,42E-05 | 0,002977773 |
| 242059_at   | AW976631  | Hs.240056            | ethanolamine kinase 1                                   | ETNK1    | EG2 | 6 | 2 | 6  | 3  | 0,0002234990,008816118 | 8,42E-05 | 0,002977773 |
| 242389_at   | BE887449  | Hs.130293, Hs.534387 |                                                         | CROP     | EG2 | 5 | 3 | 6  | 3  | 0,0002234990,008816118 | 8,42E-05 | 0,002977773 |
| 244447_at   | AW292830  | Hs.435001            | Kruppel-like factor 10                                  | KLF10    | EG2 | 5 | 3 | 9  | 0  | 0,0002234990,008816118 | 8,42E-05 | 0,002977773 |
| 39248_at    | N74607    | Hs.234642            | aquaporin 3                                             | AQP3     | EG2 | 2 | 6 | 2  | 7  | 0,0002234990,008816118 | 8,42E-05 | 0,002977773 |
| 212810_s_at | W72527    | Hs.323878            | solute carrier family 1 (glutamate/neutral amino acid t | SLC1A4   | EG2 | 6 | 1 | 11 | 6  | 0,0014790570,028294149 | 3,06E-15 | 0,001562433 |
| 225647_s_at | AI246687  | Hs.128065            | cathepsin C                                             | CTSC     | EG2 | 2 | 5 | 10 | 5  | 0,0014790570,028294149 | 7,74E-12 | 0,001562433 |
| 201397_at   | NM_006623 | Hs.487296            | phosphoglycerate dehydrogenase                          | PHGDH    | EG2 | 2 | 5 | 4  | 10 | 0,0014790570,028294149 | 2,17E-10 | 0,001562433 |
| 220576_at   | NM_024989 | Hs.229988            |                                                         | PGAP1    | EG2 | 6 | 1 | 8  | 6  | 0,0014790570,028294149 | 2,17E-10 | 0,001562433 |
| 225842_at   | AK026181  | Hs.484885            | pleckstrin homology-like domain, family A, member 1     | PHLDA1   | EG2 | 6 | 1 | 10 | 4  | 0,0014790570,028294149 | 2,17E-10 | 0,001562433 |
| 229450_at   | AI075407  | Hs.47338             | interferon-induced protein with tetratricopeptide rep   | IFIT3    | EG2 | 2 | 5 | 7  | 7  | 0,0014790570,028294149 | 2,17E-10 | 0,001562433 |
| 202934_at   | AI761561  | Hs.76090, Hs         | hexokinase 2                                            | HK2      | EG2 | 6 | 1 | 7  | 6  | 0,0014790570,028294149 | 4,56E-09 | 0,001562433 |
| 209189_at   | BC004490  | Hs.25647             | v-fos FBJ murine osteosarcoma viral oncogene homol      | FOS      | EG2 | 1 | 6 | 6  | 7  | 0,0014790570,028294149 | 4,56E-09 | 0,001562433 |
| 215177_s_at | AV733308  | Hs.133397            | integrin, alpha 6                                       | ITGA6    | EG2 | 6 | 1 | 6  | 7  | 0,0014790570,028294149 | 4,56E-09 | 0,001562433 |
| 221011_s_at | NM_030915 | Hs.468044            |                                                         | LBH      | EG2 | 3 | 4 | 5  | 8  | 0,0014790570,028294149 | 4,56E-09 | 0,001562433 |
| 201079_at   | NM_004710 | Hs.464210            | synaptogyrin 2                                          | SYNGR2   | EG2 | 2 | 5 | 6  | 6  | 0,0014790570,028294149 | 7,43E-08 | 0,001562433 |
| 202528_at   | NM_000403 | Hs.76057             | UDP-galactose-4-epimerase                               | GALE     | EG2 | 2 | 5 | 11 | 1  | 0,0014790570,028294149 | 7,43E-08 | 0,001562433 |
| 202847_at   | NM_004563 | Hs.75812             | phosphoenolpyruvate carboxykinase 2 (mitochondrial      | PCK2     | EG2 | 0 | 7 | 4  | 8  | 0,0014790570,028294149 | 7,43E-08 | 0,001562433 |



|              |           |           |                                                          |           |     |   |   |    |    |                        |          |             |
|--------------|-----------|-----------|----------------------------------------------------------|-----------|-----|---|---|----|----|------------------------|----------|-------------|
| 203139_at    | NM_004938 | Hs.380277 | death-associated protein kinase 1                        | DAPK1     | EG2 | 2 | 5 | 7  | 5  | 0,0014790570,028294149 | 7,43E-08 | 0,001562433 |
| 203358_s_at  | NM_004456 | Hs.444082 | enhancer of zeste homolog 2 (Drosophila)                 | EZH2      | EG2 | 5 | 2 | 4  | 8  | 0,0014790570,028294149 | 7,43E-08 | 0,001562433 |
| 203498_at    | NM_005822 | Hs.440168 | Down syndrome critical region gene 1-like 1              | DSCR1L1   | EG2 | 5 | 2 | 5  | 7  | 0,0014790570,028294149 | 7,43E-08 | 0,001562433 |
| 204011_at    | NM_005842 | Hs.18676  | sprouty homolog 2 (Drosophila)                           | SPRY2     | EG2 | 4 | 3 | 10 | 2  | 0,0014790570,028294149 | 7,43E-08 | 0,001562433 |
| 204589_at    | NM_014840 | Hs.524692 | NUAK family, SNF1-like kinase, 1                         | NUAK1     | EG2 | 3 | 4 | 8  | 4  | 0,0014790570,028294149 | 7,43E-08 | 0,001562433 |
| 210001_s_at  | AB005043  | Hs.50640  | suppressor of cytokine signaling 1                       | SOCS1     | EG2 | 4 | 3 | 2  | 10 | 0,0014790570,028294149 | 7,43E-08 | 0,001562433 |
| 228702_at    | AL569506  | Hs.150556 |                                                          | FLJ43663  | EG2 | 6 | 1 | 11 | 1  | 0,0014790570,028294149 | 7,43E-08 | 0,001562433 |
| 229744_at    | AL556611  | Hs.196983 | sperm specific antigen 2                                 | SSFA2     | EG2 | 6 | 1 | 9  | 3  | 0,0014790570,028294149 | 7,43E-08 | 0,001562433 |
| 230179_at    | N52572    | Hs.435694 |                                                          | LOC285812 | EG2 | 5 | 2 | 11 | 1  | 0,0014790570,028294149 | 7,43E-08 | 0,001562433 |
| 230930_at    | AI435839  | Hs.558072 |                                                          | LOC338620 | EG2 | 3 | 4 | 7  | 5  | 0,0014790570,028294149 | 7,43E-08 | 0,001562433 |
| 231775_at    | W65310    | Hs.401745 | tumor necrosis factor receptor superfamily, member 1     | TNFRSF10A | EG2 | 4 | 3 | 6  | 6  | 0,0014790570,028294149 | 7,43E-08 | 0,001562433 |
| 233020_at    | AU154125  | Hs.534212 | SEC22 vesicle trafficking protein-like 1 (S. cerevisiae) | SEC22L1   | EG2 | 3 | 4 | 9  | 3  | 0,0014790570,028294149 | 7,43E-08 | 0,001562433 |
| 241763_s_at  | BF244402  | Hs.403933 | F-box protein 32                                         | FBXO32    | EG2 | 5 | 2 | 4  | 8  | 0,0014790570,028294149 | 7,43E-08 | 0,001562433 |
| 1553995_a_at | BC015940  | Hs.153952 | 5'-nucleotidase, ecto (CD73)                             | NT5E      | EG2 | 5 | 2 | 7  | 4  | 0,0014790570,028294149 | 9,59E-07 | 0,001562433 |
| 1555827_at   | AY034790  | Hs.4859   | cyclin L1                                                | CCNL1     | EG2 | 6 | 1 | 4  | 7  | 0,0014790570,028294149 | 9,59E-07 | 0,001562433 |
| 1555847_a_at | BU617052  | Hs.436426 |                                                          | LOC284454 | EG2 | 6 | 1 | 10 | 1  | 0,0014790570,028294149 | 9,59E-07 | 0,001562433 |
| 200962_at    | AI348010  | Hs.442657 | TBC1 domain family, member 8 (with GRAM domain)          | TBC1D8    | EG2 | 7 | 0 | 3  | 8  | 0,0014790570,028294149 | 9,59E-07 | 0,001562433 |
| 203404_at    | NM_014782 | Hs.48924  | armadillo repeat containing, X-linked 2                  | ARMCX2    | EG2 | 3 | 4 | 5  | 6  | 0,0014790570,028294149 | 9,59E-07 | 0,001562433 |
| 204162_at    | NM_006101 | Hs.414407 | kinetochore associated 2                                 | KNTC2     | EG2 | 4 | 3 | 4  | 7  | 0,0014790570,028294149 | 9,59E-07 | 0,001562433 |
| 205081_at    | NM_001311 | Hs.70327  | cysteine-rich protein 1 (intestinal)                     | CRIP1     | EG2 | 0 | 7 | 4  | 7  | 0,0014790570,028294149 | 9,59E-07 | 0,001562433 |
| 208690_s_at  | BC000915  | Hs.368525 | PDZ and LIM domain 1 (elfin)                             | PDLIM1    | EG2 | 2 | 5 | 5  | 6  | 0,0014790570,028294149 | 9,59E-07 | 0,001562433 |
| 209016_s_at  | BC002700  | Hs.411501 | keratin 7                                                | KRT7      | EG2 | 3 | 4 | 5  | 6  | 0,0014790570,028294149 | 9,59E-07 | 0,001562433 |
| 209891_at    | AF225416  | Hs.421956 | spindle pole body component 25 homolog (S. cerevisi      | SPBC25    | EG2 | 4 | 3 | 2  | 9  | 0,0014790570,028294149 | 9,59E-07 | 0,001562433 |
| 209911_x_at  | BC002842  | Hs.130853 | histone 1, H2bd                                          | HIST1H2BD | EG2 | 5 | 2 | 6  | 5  | 0,0014790570,028294149 | 9,59E-07 | 0,001562433 |
| 210524_x_at  | AF078844  |           |                                                          |           | EG2 | 1 | 6 | 7  | 4  | 0,0014790570,028294149 | 9,59E-07 | 0,001562433 |
| 213865_at    | AI378788  | Hs.203691 | discoïdin, CUB and LCCL domain containing 2              | DCBLD2    | EG2 | 6 | 1 | 10 | 1  | 0,0014790570,028294149 | 9,59E-07 | 0,001562433 |
| 215071_s_at  | AL353759  | Hs.484950 | histone 1, H2ac                                          | HIST1H2AC | EG2 | 5 | 2 | 5  | 6  | 0,0014790570,028294149 | 9,59E-07 | 0,001562433 |
| 217979_at    | NM_014399 | Hs.364544 | tetraspanin 13                                           | TSPAN13   | EG2 | 6 | 1 | 9  | 2  | 0,0014790570,028294149 | 9,59E-07 | 0,001562433 |
| 221778_at    | BE217882  | Hs.308710 |                                                          | KIAA1718  | EG2 | 5 | 2 | 6  | 5  | 0,0014790570,028294149 | 9,59E-07 | 0,001562433 |
| 225415_at    | AA577672  | Hs.518201 | deltex 3-like (Drosophila)                               | DTX3L     | EG2 | 2 | 5 | 4  | 7  | 0,0014790570,028294149 | 9,59E-07 | 0,001562433 |
| 227223_at    | BE466173  | Hs.282901 | RNA-binding region (RNP1, RRM) containing 2              | RNPC2     | EG2 | 1 | 6 | 6  | 5  | 0,0014790570,028294149 | 9,59E-07 | 0,001562433 |
| 227467_at    | AV697515  | Hs.244940 | retinol dehydrogenase 10 (all-trans)                     | RDH10     | EG2 | 2 | 5 | 5  | 6  | 0,0014790570,028294149 | 9,59E-07 | 0,001562433 |
| 228948_at    | T15545    | Hs.371218 | EPH receptor A4                                          | EPHA4     | EG2 | 5 | 2 | 3  | 8  | 0,0014790570,028294149 | 9,59E-07 | 0,001562433 |
| 230746_s_at  | AW003173  | Hs.25590  | stanniocalcin 1                                          | STC1      | EG2 | 3 | 4 | 9  | 2  | 0,0014790570,028294149 | 9,59E-07 | 0,001562433 |
| 235652_at    | AI431345  | Hs.109655 | sex comb on midleg-like 1 (Drosophila)                   | SCML1     | EG2 | 5 | 2 | 5  | 6  | 0,0014790570,028294149 | 9,59E-07 | 0,001562433 |
| 235803_at    | AA843122  | Hs.370168 | cytokine receptor-like factor 3                          | CRLF3     | EG2 | 4 | 3 | 6  | 5  | 0,0014790570,028294149 | 9,59E-07 | 0,001562433 |
| 236769_at    | BE504242  | Hs.153799 |                                                          | LOC158402 | EG2 | 3 | 4 | 4  | 7  | 0,0014790570,028294149 | 9,59E-07 | 0,001562433 |
| 239108_at    | H16791    | Hs.298851 | male sterility domain containing 1                       | MLSTD1    | EG2 | 1 | 6 | 1  | 10 | 0,0014790570,028294149 | 9,59E-07 | 0,001562433 |
| 1553185_at   | NM_152573 | Hs.129136 | RAS and EF-hand domain containing                        | RASEF     | EG2 | 2 | 5 | 5  | 5  | 0,0014790570,028294149 | 9,97E-06 | 0,001562433 |
| 1559883_s_at | AF147427  | Hs.472630 | SAM domain and HD domain 1                               | SAMHD1    | EG2 | 2 | 5 | 4  | 6  | 0,0014790570,028294149 | 9,97E-06 | 0,001562433 |
| 200974_at    | NM_001613 | Hs.500483 | actin, alpha 2, smooth muscle, aorta                     | ACTA2     | EG2 | 0 | 7 | 6  | 4  | 0,0014790570,028294149 | 9,97E-06 | 0,001562433 |
| 201392_s_at  | BG031974  | Hs.487062 | insulin-like growth factor 2 receptor                    | IGF2R     | EG2 | 1 | 6 | 8  | 2  | 0,0014790570,028294149 | 9,97E-06 | 0,001562433 |
| 201752_s_at  | AI763123  | Hs.501012 | adducin 3 (gamma)                                        | ADD3      | EG2 | 2 | 5 | 4  | 6  | 0,0014790570,028294149 | 9,97E-06 | 0,001562433 |
| 202393_s_at  | NM_005655 | Hs.435001 | Kruppel-like factor 10                                   | KLF10     | EG2 | 5 | 2 | 9  | 1  | 0,0014790570,028294149 | 9,97E-06 | 0,001562433 |
| 202481_at    | NM_004753 | Hs.289347 | dehydrogenase/reductase (SDR family) member 3            | DHRS3     | EG2 | 2 | 5 | 2  | 8  | 0,0014790570,028294149 | 9,97E-06 | 0,001562433 |

|              |                      |              |                                                         |          |     |   |   |   |   |                        |          |             |
|--------------|----------------------|--------------|---------------------------------------------------------|----------|-----|---|---|---|---|------------------------|----------|-------------|
| 204444_at    | NM_004523            | Hs.8878      | kinesin family member 11                                | KIF11    | EG2 | 4 | 3 | 3 | 7 | 0,0014790570,028294149 | 9,97E-06 | 0,001562433 |
| 204793_at    | NM_014710            | Hs.522730    | G protein-coupled receptor associated sorting protein   | GPRASP1  | EG2 | 6 | 1 | 1 | 9 | 0,0014790570,028294149 | 9,97E-06 | 0,001562433 |
| 205884_at    | NM_000885            | Hs.555880    | integrin, alpha 4 (antigen CD49D, alpha 4 subunit of VL | ITGA4    | EG2 | 5 | 2 | 1 | 9 | 0,0014790570,028294149 | 9,97E-06 | 0,001562433 |
| 209255_at    | D87454               | Hs.520710    |                                                         | KIAA0265 | EG2 | 4 | 3 | 7 | 3 | 0,0014790570,028294149 | 9,97E-06 | 0,001562433 |
| 209304_x_at  | AF087853             | Hs.110571    | growth arrest and DNA-damage-inducible, beta            | GADD45B  | EG2 | 3 | 4 | 5 | 5 | 0,0014790570,028294149 | 9,97E-06 | 0,001562433 |
| 210868_s_at  | BC001305             | Hs.412939    | ELOVL family member 6, elongation of long chain fatty   | ELOVL6   | EG2 | 6 | 1 | 4 | 6 | 0,0014790570,028294149 | 9,97E-06 | 0,001562433 |
| 212099_at    | AI263909             | Hs.502876    | ras homolog gene family, member B                       | RHOB     | EG2 | 4 | 3 | 7 | 3 | 0,0014790570,028294149 | 9,97E-06 | 0,001562433 |
| 212307_s_at  | BF001665             | Hs.405410    | O-linked N-acetylglucosamine (GlcNAc) transferase (U    | OGT      | EG2 | 6 | 1 | 7 | 3 | 0,0014790570,028294149 | 9,97E-06 | 0,001562433 |
| 215191_at    | AW836210             | Hs.124147    | F-box and leucine-rich repeat protein 11                | FBXL11   | EG2 | 4 | 3 | 6 | 4 | 0,0014790570,028294149 | 9,97E-06 | 0,001562433 |
| 215719_x_at  | X83493               | Hs.244139    | Fas (TNF receptor superfamily, member 6)                | FAS      | EG2 | 3 | 4 | 8 | 2 | 0,0014790570,028294149 | 9,97E-06 | 0,001562433 |
| 217997_at    | AI795908             | Hs.484885    | pleckstrin homology-like domain, family A, member 1     | PHLDA1   | EG2 | 6 | 1 | 8 | 2 | 0,0014790570,028294149 | 9,97E-06 | 0,001562433 |
| 218273_s_at  | NM_018444            | Hs.22265     | protein phosphatase 2C, magnesium-dependent, cata       | PPM2C    | EG2 | 4 | 3 | 4 | 6 | 0,0014790570,028294149 | 9,97E-06 | 0,001562433 |
| 218724_s_at  | NM_021809            | Hs.292281    | TGFB-induced factor 2 (TALE family homeobox)            | TGIF2    | EG2 | 5 | 2 | 1 | 9 | 0,0014790570,028294149 | 9,97E-06 | 0,001562433 |
| 219038_at    | NM_024657            | Hs.496544    | MORC family CW-type zinc finger 4                       | MORC4    | EG2 | 4 | 3 | 9 | 1 | 0,0014790570,028294149 | 9,97E-06 | 0,001562433 |
| 221766_s_at  | AW246673             | Hs.10784     | family with sequence similarity 46, member A            | FAM46A   | EG2 | 5 | 2 | 7 | 3 | 0,0014790570,028294149 | 9,97E-06 | 0,001562433 |
| 222696_at    | BF684446             | Hs.156527    | axin 2 (conductin, axil)                                | AXIN2    | EG2 | 3 | 4 | 1 | 9 | 0,0014790570,028294149 | 9,97E-06 | 0,001562433 |
| 226269_at    | BF002104             | Hs.168950    | ganglioside-induced differentiation-associated protei   | GDAP1    | EG2 | 5 | 2 | 2 | 8 | 0,0014790570,028294149 | 9,97E-06 | 0,001562433 |
| 229881_at    | R41200               | Hs.373857    | Kruppel-like factor 12                                  | KLF12    | EG2 | 6 | 1 | 4 | 6 | 0,0014790570,028294149 | 9,97E-06 | 0,001562433 |
| 230958_s_at  | BE670797             |              |                                                         |          | EG2 | 6 | 1 | 5 | 5 | 0,0014790570,028294149 | 9,97E-06 | 0,001562433 |
| 234989_at    | AV699657             | Hs.523789    |                                                         | TncRNA   | EG2 | 5 | 2 | 7 | 3 | 0,0014790570,028294149 | 9,97E-06 | 0,001562433 |
| 235061_at    | AV706522             | Hs.291000    | protein phosphatase 1K (PP2C domain containing)         | PPM1K    | EG2 | 7 | 0 | 5 | 5 | 0,0014790570,028294149 | 9,97E-06 | 0,001562433 |
| 235463_s_at  | AI081356             | Hs.506829    | LAG1 longevity assurance homolog 6 (S. cerevisiae)      | LASS6    | EG2 | 5 | 2 | 4 | 6 | 0,0014790570,028294149 | 9,97E-06 | 0,001562433 |
| 236600_at    | AI651603             | Hs.440414    | spastic paraplegia 20, spartin (Troyer syndrome)        | SPG20    | EG2 | 6 | 1 | 4 | 6 | 0,0014790570,028294149 | 9,97E-06 | 0,001562433 |
| 238002_at    | BF342391             | Hs.143600    | golgi phosphoprotein 4                                  | GOLPH4   | EG2 | 7 | 0 | 7 | 3 | 0,0014790570,028294149 | 9,97E-06 | 0,001562433 |
| 239251_at    | AW963634             | Hs.429581    | reticulon 4                                             | RTN4     | EG2 | 4 | 3 | 8 | 2 | 0,0014790570,028294149 | 9,97E-06 | 0,001562433 |
| 241722_x_at  | BF724558             |              |                                                         |          | EG2 | 3 | 4 | 7 | 3 | 0,0014790570,028294149 | 9,97E-06 | 0,001562433 |
| AFFX-HUMRG   | AFFX-HUMRGE/M10098_5 |              |                                                         |          | EG2 | 3 | 4 | 2 | 8 | 0,0014790570,028294149 | 9,97E-06 | 0,001562433 |
| 1553575_at   | NM_173714            |              |                                                         |          | EG2 | 1 | 6 | 3 | 6 | 0,0014790570,028294149 | 8,42E-05 | 0,002977773 |
| 1554408_a_at | BC007986             | Hs.515122    | thymidine kinase 1, soluble                             | TK1      | EG2 | 3 | 4 | 3 | 6 | 0,0014790570,028294149 | 8,42E-05 | 0,002977773 |
| 1554478_a_at | BC033077             | Hs.313917    |                                                         | FLJ20718 | EG2 | 5 | 2 | 2 | 7 | 0,0014790570,028294149 | 8,42E-05 | 0,002977773 |
| 1555852_at   | AI375915             | Hs.352018    | transporter 1, ATP-binding cassette, sub-family B (MD   | TAP1     | EG2 | 2 | 5 | 2 | 7 | 0,0014790570,028294149 | 8,42E-05 | 0,002977773 |
| 201666_at    | NM_003254            | Hs.522632    | TIMP metalloproteinase inhibitor 1                      | TIMP1    | EG2 | 0 | 7 | 6 | 3 | 0,0014790570,028294149 | 8,42E-05 | 0,002977773 |
| 202269_x_at  | BC002666             | Hs.62661, Hs | guanylate binding protein 1, interferon-inducible, 67k  | GBP1     | EG2 | 1 | 6 | 2 | 7 | 0,0014790570,028294149 | 8,42E-05 | 0,002977773 |
| 202270_at    | NM_002053            | Hs.62661, Hs | guanylate binding protein 1, interferon-inducible, 67k  | GBP1     | EG2 | 1 | 6 | 2 | 7 | 0,0014790570,028294149 | 8,42E-05 | 0,002977773 |
| 202534_x_at  | NM_000791            | Hs.83765, Hs | dihydrofolate reductase                                 | DHFR     | EG2 | 3 | 4 | 2 | 7 | 0,0014790570,028294149 | 8,42E-05 | 0,002977773 |
| 203373_at    | NM_003877            | Hs.485572    | suppressor of cytokine signaling 2                      | SOCS2    | EG2 | 2 | 5 | 6 | 3 | 0,0014790570,028294149 | 8,42E-05 | 0,002977773 |
| 203586_s_at  | NM_001661            | Hs.183153    | ADP-ribosylation factor 4-like                          | ARF4L    | EG2 | 6 | 1 | 5 | 4 | 0,0014790570,028294149 | 8,42E-05 | 0,002977773 |
| 203665_at    | NM_002133            | Hs.517581    | heme oxygenase (decycling) 1                            | HMOX1    | EG2 | 4 | 3 | 8 | 1 | 0,0014790570,028294149 | 8,42E-05 | 0,002977773 |
| 204780_s_at  | AA164751             | Hs.244139    | Fas (TNF receptor superfamily, member 6)                | FAS      | EG2 | 2 | 5 | 7 | 2 | 0,0014790570,028294149 | 8,42E-05 | 0,002977773 |
| 205443_at    | NM_003082            | Hs.179312    | small nuclear RNA activating complex, polypeptide 1,    | SNAPC1   | EG2 | 4 | 3 | 4 | 5 | 0,0014790570,028294149 | 8,42E-05 | 0,002977773 |
| 205518_s_at  | NM_003570            | Hs.484918    | cytidine monophosphate-N-acetylneuraminic acid hy       | CMAH     | EG2 | 3 | 4 | 2 | 7 | 0,0014790570,028294149 | 8,42E-05 | 0,002977773 |
| 205608_s_at  | U83508               | Hs.369675    | angiopoietin 1                                          | ANGPT1   | EG2 | 7 | 0 | 4 | 5 | 0,0014790570,028294149 | 8,42E-05 | 0,002977773 |
| 206561_s_at  | NM_020299            | Hs.116724    | aldo-keto reductase family 1, member B10 (aldose red    | AKR1B10  | EG2 | 6 | 1 | 5 | 4 | 0,0014790570,028294149 | 8,42E-05 | 0,002977773 |
| 208960_s_at  | BE675435             | Hs.4055      | Kruppel-like factor 6                                   | KLF6     | EG2 | 2 | 5 | 5 | 4 | 0,0014790570,028294149 | 8,42E-05 | 0,002977773 |
| 209147_s_at  | AB000888             | Hs.435122    | phosphatidic acid phosphatase type 2A                   | PPAP2A   | EG2 | 2 | 5 | 4 | 5 | 0,0014790570,028294149 | 8,42E-05 | 0,002977773 |

|             |           |            |                                                           |              |     |   |   |   |   |                        |          |             |
|-------------|-----------|------------|-----------------------------------------------------------|--------------|-----|---|---|---|---|------------------------|----------|-------------|
| 209193_at   | M24779    | Hs.81170   | pim-1 oncogene                                            | PIM1         | EG2 | 2 | 5 | 1 | 8 | 0,0014790570,028294149 | 8,42E-05 | 0,002977773 |
| 209581_at   | BC001387  | Hs.502775  | HRAS-like suppressor 3                                    | HRASLS3      | EG2 | 4 | 3 | 6 | 3 | 0,0014790570,028294149 | 8,42E-05 | 0,002977773 |
| 209744_x_at | AB056663  | Hs.472509  | itchy homolog E3 ubiquitin protein ligase (mouse)         | ITCH         | EG2 | 4 | 3 | 6 | 3 | 0,0014790570,028294149 | 8,42E-05 | 0,002977773 |
| 209806_at   | BC000893  | Hs.437275  | histone 1, H2bk                                           | HIST1H2BK    | EG2 | 4 | 3 | 3 | 6 | 0,0014790570,028294149 | 8,42E-05 | 0,002977773 |
| 209862_s_at | BC001233  | Hs.101014  |                                                           | PIG8         | EG2 | 5 | 2 | 5 | 4 | 0,0014790570,028294149 | 8,42E-05 | 0,002977773 |
| 212196_at   | AW242916  | Hs.454699, | H interleukin 6 signal transducer (gp130, oncostatin M re | IL6ST        | EG2 | 7 | 0 | 2 | 7 | 0,0014790570,028294149 | 8,42E-05 | 0,002977773 |
| 212730_at   | AK026420  | Hs.207106  | desmuslin                                                 | DMN          | EG2 | 4 | 3 | 5 | 4 | 0,0014790570,028294149 | 8,42E-05 | 0,002977773 |
| 212841_s_at | AI692180  | Hs.16019   | PTPRF interacting protein, binding protein 2 (liprin be   | PPFIBP2      | EG2 | 4 | 3 | 2 | 7 | 0,0014790570,028294149 | 8,42E-05 | 0,002977773 |
| 216028_at   | AL049980  | Hs.184216  |                                                           | DKFZP564C152 | EG2 | 4 | 3 | 5 | 4 | 0,0014790570,028294149 | 8,42E-05 | 0,002977773 |
| 218485_s_at | NM_018389 | Hs.12211   | solute carrier family 35, member C1                       | SLC35C1      | EG2 | 1 | 6 | 3 | 6 | 0,0014790570,028294149 | 8,42E-05 | 0,002977773 |
| 218662_s_at | NM_022346 | Hs.446201, | Hs.479270                                                 | HCAP-G       | EG2 | 4 | 3 | 3 | 6 | 0,0014790570,028294149 | 8,42E-05 | 0,002977773 |
| 218795_at   | NM_016361 | Hs.528084  | acid phosphatase 6, lysophosphatidic                      | ACP6         | EG2 | 0 | 7 | 3 | 6 | 0,0014790570,028294149 | 8,42E-05 | 0,002977773 |
| 218935_at   | NM_014600 | Hs.368808  | EH-domain containing 3                                    | EHD3         | EG2 | 1 | 6 | 6 | 3 | 0,0014790570,028294149 | 8,42E-05 | 0,002977773 |
| 219000_s_at | NM_024094 | Hs.315167  |                                                           | DCC1         | EG2 | 3 | 4 | 3 | 6 | 0,0014790570,028294149 | 8,42E-05 | 0,002977773 |
| 219117_s_at | NM_016594 | Hs.438695  | FK506 binding protein 11, 19 kDa                          | FKBP11       | EG2 | 6 | 1 | 7 | 2 | 0,0014790570,028294149 | 8,42E-05 | 0,002977773 |
| 219148_at   | NM_018492 | Hs.104741  | PDZ binding kinase                                        | PBK          | EG2 | 5 | 2 | 3 | 6 | 0,0014790570,028294149 | 8,42E-05 | 0,002977773 |
| 220940_at   | NM_025190 | Hs.503490, | H KIAA1641                                                | KIAA1641     | EG2 | 3 | 4 | 5 | 4 | 0,0014790570,028294149 | 8,42E-05 | 0,002977773 |
| 222640_at   | N26002    | Hs.515840  | DNA (cytosine-5-)-methyltransferase 3 alpha               | DNMT3A       | EG2 | 1 | 6 | 2 | 7 | 0,0014790570,028294149 | 8,42E-05 | 0,002977773 |
| 223222_at   | BC001075  | Hs.514470  | solute carrier family 25 (mitochondrial deoxynucleoti     | SLC25A19     | EG2 | 4 | 3 | 5 | 4 | 0,0014790570,028294149 | 8,42E-05 | 0,002977773 |
| 223319_at   | AF272663  | Hs.208765  | gephyrin                                                  | GPHN         | EG2 | 6 | 1 | 3 | 6 | 0,0014790570,028294149 | 8,42E-05 | 0,002977773 |
| 223464_at   | AL136918  | Hs.436166  | oxysterol binding protein-like 5                          | OSBPL5       | EG2 | 4 | 3 | 5 | 4 | 0,0014790570,028294149 | 8,42E-05 | 0,002977773 |
| 224836_at   | AL109824  | Hs.516994  | tumor protein p53 inducible nuclear protein 2             | TP53INP2     | EG2 | 6 | 1 | 5 | 4 | 0,0014790570,028294149 | 8,42E-05 | 0,002977773 |
| 225129_at   | AW170571  | Hs.339809  | copine II                                                 | CPNE2        | EG2 | 1 | 6 | 0 | 9 | 0,0014790570,028294149 | 8,42E-05 | 0,002977773 |
| 225613_at   | AI096389  | Hs.133539  | microtubule associated serine/threonine kinase famil      | MAST4        | EG2 | 3 | 4 | 2 | 7 | 0,0014790570,028294149 | 8,42E-05 | 0,002977773 |
| 226583_at   | AL560962  | Hs.44817   |                                                           | FLJ40142     | EG2 | 3 | 4 | 4 | 5 | 0,0014790570,028294149 | 8,42E-05 | 0,002977773 |
| 226718_at   | AA001423  | Hs.12264   | adhesion molecule with Ig-like domain 1                   | AMIGO1       | EG2 | 1 | 6 | 0 | 9 | 0,0014790570,028294149 | 8,42E-05 | 0,002977773 |
| 228370_at   | BF114870  | Hs.525700  | small nuclear ribonucleoprotein polypeptide N             | SNRPN        | EG2 | 7 | 0 | 5 | 4 | 0,0014790570,028294149 | 8,42E-05 | 0,002977773 |
| 228667_at   | AI733330  | Hs.353175  | 1-acylglycerol-3-phosphate O-acyltransferase 4 (lysop     | AGPAT4       | EG2 | 3 | 4 | 9 | 0 | 0,0014790570,028294149 | 8,42E-05 | 0,002977773 |
| 228829_at   | AI279868  | Hs.12286   | activating transcription factor 7                         | ATF7         | EG2 | 2 | 5 | 9 | 0 | 0,0014790570,028294149 | 8,42E-05 | 0,002977773 |
| 229189_s_at | BF672306  |            |                                                           |              | EG2 | 0 | 7 | 5 | 4 | 0,0014790570,028294149 | 8,42E-05 | 0,002977773 |
| 229193_at   | AA005430  | Hs.130293, | Hs.534387                                                 | CROP         | EG2 | 6 | 1 | 6 | 3 | 0,0014790570,028294149 | 8,42E-05 | 0,002977773 |
| 229490_s_at | AW271106  | Hs.133294  | IQ motif containing GTPase activating protein 3           | IQGAP3       | EG2 | 4 | 3 | 2 | 7 | 0,0014790570,028294149 | 8,42E-05 | 0,002977773 |
| 229553_at   | AA736452  | Hs.26612   | phosphoglucomutase 2-like 1                               | PGM2L1       | EG2 | 5 | 2 | 2 | 7 | 0,0014790570,028294149 | 8,42E-05 | 0,002977773 |
| 229748_x_at | AI380156  |            |                                                           |              | EG2 | 1 | 6 | 5 | 4 | 0,0014790570,028294149 | 8,42E-05 | 0,002977773 |
| 230083_at   | AW188464  | Hs.431081  | ubiquitin specific peptidase 53                           | USP53        | EG2 | 5 | 2 | 2 | 7 | 0,0014790570,028294149 | 8,42E-05 | 0,002977773 |
| 230097_at   | AI207338  | Hs.473648  | phosphoribosylglycinamide formyltransferase, phosp        | GART         | EG2 | 6 | 1 | 6 | 3 | 0,0014790570,028294149 | 8,42E-05 | 0,002977773 |
| 230300_at   | N22849    |            |                                                           |              | EG2 | 4 | 3 | 6 | 3 | 0,0014790570,028294149 | 8,42E-05 | 0,002977773 |
| 230305_at   | AW000995  |            |                                                           |              | EG2 | 6 | 1 | 5 | 4 | 0,0014790570,028294149 | 8,42E-05 | 0,002977773 |
| 230906_at   | AK024931  | Hs.34421,  | Hs UDP-N-acetyl-alpha-D-galactosamine:polypeptide N-      | GALNT10      | EG2 | 4 | 3 | 8 | 1 | 0,0014790570,028294149 | 8,42E-05 | 0,002977773 |
| 231577_s_at | AW014593  | Hs.62661,  | Hs guanylate binding protein 1, interferon-inducible, 67k | GBP1         | EG2 | 1 | 6 | 2 | 7 | 0,0014790570,028294149 | 8,42E-05 | 0,002977773 |
| 235113_at   | AA742244  | Hs.556013  | peptidylprolyl isomerase (cyclophilin)-like 5             | PPIL5        | EG2 | 4 | 3 | 5 | 4 | 0,0014790570,028294149 | 8,42E-05 | 0,002977773 |
| 235315_at   | AI809519  | Hs.450972, | H TSC22 domain family, member 1                           | TSC22D1      | EG2 | 7 | 0 | 3 | 6 | 0,0014790570,028294149 | 8,42E-05 | 0,002977773 |
| 238902_at   | T85248    | Hs.308480  |                                                           | LOC115294    | EG2 | 5 | 2 | 4 | 5 | 0,0014790570,028294149 | 8,42E-05 | 0,002977773 |
| 239208_s_at | AW945538  |            |                                                           |              | EG2 | 2 | 5 | 2 | 7 | 0,0014790570,028294149 | 8,42E-05 | 0,002977773 |
| 240165_at   | AI678013  |            |                                                           |              | EG2 | 4 | 3 | 8 | 1 | 0,0014790570,028294149 | 8,42E-05 | 0,002977773 |

|                |                  |                      |                                                           |               |     |   |   |    |    |                        |          |             |
|----------------|------------------|----------------------|-----------------------------------------------------------|---------------|-----|---|---|----|----|------------------------|----------|-------------|
| 242907_at      | BF509371         | Hs.386567            | guanylate binding protein 2, interferon-inducible         | GBP2          | EG2 | 1 | 6 | 0  | 9  | 0,0014790570,028294149 | 8,42E-05 | 0,002977773 |
| 52940_at       | AA085764         | Hs.501624            |                                                           | SIGIRR        | EG2 | 0 | 7 | 1  | 8  | 0,0014790570,028294149 | 8,42E-05 | 0,002977773 |
| AFFX-r2-Bs-lys | AFFX-R2-BS-LYS-5 |                      |                                                           |               | EG2 | 2 | 5 | 2  | 7  | 0,0014790570,028294149 | 8,42E-05 | 0,002977773 |
| 209610_s_at    | BF340083         | Hs.323878            | solute carrier family 1 (glutamate/neutral amino acid t   | SLC1A4        | EG2 | 5 | 1 | 11 | 7  | 0,0078675760,079901528 | 2,28E-17 | 0,001562433 |
| 207761_s_at    | NM_014033        | Hs.288771            |                                                           | DKFZP586A0522 | EG2 | 3 | 3 | 10 | 5  | 0,0078675760,079901528 | 7,74E-12 | 0,001562433 |
| 226142_at      | AV682252         | Hs.553516            | GLI pathogenesis-related 1 (glioma)                       | GLIPR1        | EG2 | 5 | 1 | 7  | 8  | 0,0078675760,079901528 | 7,74E-12 | 0,001562433 |
| 228708_at      | BF438386         | Hs.25318             | RAB27B, member RAS oncogene family                        | RAB27B        | EG2 | 3 | 3 | 11 | 4  | 0,0078675760,079901528 | 7,74E-12 | 0,001562433 |
| 226225_at      | BE967311         | Hs.483104            | mutated in colorectal cancers                             | MCC           | EG2 | 3 | 3 | 3  | 11 | 0,0078675760,079901528 | 2,17E-10 | 0,001562433 |
| 201487_at      | NM_001814        | Hs.128065            | cathepsin C                                               | CTSC          | EG2 | 1 | 5 | 8  | 5  | 0,0078675760,079901528 | 4,56E-09 | 0,001562433 |
| 204256_at      | NM_024090        | Hs.412939            | ELOVL family member 6, elongation of long chain fatty     | ELOVL6        | EG2 | 5 | 1 | 7  | 6  | 0,0078675760,079901528 | 4,56E-09 | 0,001562433 |
| 204749_at      | NM_004538        | Hs.21365             | nucleosome assembly protein 1-like 3                      | NAP1L3        | EG2 | 5 | 1 | 9  | 4  | 0,0078675760,079901528 | 4,56E-09 | 0,001562433 |
| 208926_at      | U84246           | Hs.520037            | sialidase 1 (lysosomal sialidase)                         | NEU1          | EG2 | 4 | 2 | 11 | 2  | 0,0078675760,079901528 | 4,56E-09 | 0,001562433 |
| 216236_s_at    | AL110298         | Hs.210227            | solute carrier family 2 (facilitated glucose transporter) | SLC2A3        | EG2 | 4 | 2 | 7  | 6  | 0,0078675760,079901528 | 4,56E-09 | 0,001562433 |
| 217996_at      | AA576961         | Hs.484885            | pleckstrin homology-like domain, family A, member 1       | PHLDA1        | EG2 | 4 | 2 | 8  | 5  | 0,0078675760,079901528 | 4,56E-09 | 0,001562433 |
| 222862_s_at    | BG169832         | Hs.18268             | adenylate kinase 5                                        | AK5           | EG2 | 4 | 2 | 6  | 7  | 0,0078675760,079901528 | 4,56E-09 | 0,001562433 |
| 227224_at      | AW003297         | Hs.496222            | Ral GEF with PH domain and SH3 binding motif 2            | RALGPS2       | EG2 | 4 | 2 | 3  | 10 | 0,0078675760,079901528 | 4,56E-09 | 0,001562433 |
| 227486_at      | AI086864         | Hs.153952            | 5'-nucleotidase, ecto (CD73)                              | NT5E          | EG2 | 4 | 2 | 9  | 4  | 0,0078675760,079901528 | 4,56E-09 | 0,001562433 |
| 228033_at      | AI341146         | Hs.416375            | E2F transcription factor 7                                | E2F7          | EG2 | 3 | 3 | 11 | 2  | 0,0078675760,079901528 | 4,56E-09 | 0,001562433 |
| 239614_x_at    | AW173003         | Hs.116448            | glutaminase                                               | GLS           | EG2 | 4 | 2 | 6  | 7  | 0,0078675760,079901528 | 4,56E-09 | 0,001562433 |
| 242051_at      | AI695695         |                      |                                                           |               | EG2 | 3 | 3 | 6  | 7  | 0,0078675760,079901528 | 4,56E-09 | 0,001562433 |
| 201341_at      | NM_003633        | Hs.104925            | ectodermal-neural cortex (with BTB-like domain)           | ENC1          | EG2 | 5 | 1 | 8  | 4  | 0,0078675760,079901528 | 7,43E-08 | 0,001562433 |
| 201540_at      | NM_001449        | Hs.435369            | four and a half LIM domains 1                             | FHL1          | EG2 | 1 | 5 | 1  | 11 | 0,0078675760,079901528 | 7,43E-08 | 0,001562433 |
| 201739_at      | NM_005627        | Hs.296323            | serum/glucocorticoid regulated kinase                     | SGK           | EG2 | 4 | 2 | 4  | 8  | 0,0078675760,079901528 | 7,43E-08 | 0,001562433 |
| 202887_s_at    | NM_019058        | Hs.523012            | DNA-damage-inducible transcript 4                         | DDIT4         | EG2 | 0 | 6 | 4  | 8  | 0,0078675760,079901528 | 7,43E-08 | 0,001562433 |
| 202912_at      | NM_001124        | Hs.441047            | adrenomedullin                                            | ADM           | EG2 | 5 | 1 | 5  | 7  | 0,0078675760,079901528 | 7,43E-08 | 0,001562433 |
| 203851_at      | NM_002178        | Hs.274313            | insulin-like growth factor binding protein 6              | IGFBP6        | EG2 | 1 | 5 | 4  | 8  | 0,0078675760,079901528 | 7,43E-08 | 0,001562433 |
| 204596_s_at    | U46768           | Hs.25590             | stanniocalcin 1                                           | STC1          | EG2 | 3 | 3 | 10 | 2  | 0,0078675760,079901528 | 7,43E-08 | 0,001562433 |
| 205803_s_at    | NM_003304        | Hs.250687            | transient receptor potential cation channel, subfamily    | TRPC1         | EG2 | 2 | 4 | 4  | 8  | 0,0078675760,079901528 | 7,43E-08 | 0,001562433 |
| 209383_at      | BC003637         | Hs.505777            | DNA-damage-inducible transcript 3                         | DDIT3         | EG2 | 5 | 1 | 10 | 2  | 0,0078675760,079901528 | 7,43E-08 | 0,001562433 |
| 217967_s_at    | AF288391         | Hs.518662            | chromosome 1 open reading frame 24                        | C1orf24       | EG2 | 2 | 4 | 6  | 6  | 0,0078675760,079901528 | 7,43E-08 | 0,001562433 |
| 219118_at      | NM_016594        | Hs.438695            | FK506 binding protein 11, 19 kDa                          | FKBP11        | EG2 | 3 | 3 | 8  | 4  | 0,0078675760,079901528 | 7,43E-08 | 0,001562433 |
| 221973_at      | AI983904         |                      |                                                           |               | EG2 | 4 | 2 | 7  | 5  | 0,0078675760,079901528 | 7,43E-08 | 0,001562433 |
| 221974_at      | AW770748         | Hs.525700            | small nuclear ribonucleoprotein polypeptide N             | SNRPN         | EG2 | 5 | 1 | 6  | 6  | 0,0078675760,079901528 | 7,43E-08 | 0,001562433 |
| 222931_s_at    | AI809864         | Hs.555980            | threonine synthase-like 1 (bacterial)                     | THNSL1        | EG2 | 3 | 3 | 6  | 6  | 0,0078675760,079901528 | 7,43E-08 | 0,001562433 |
| 223196_s_at    | AL136551         | Hs.469543            | sestrin 2                                                 | SESN2         | EG2 | 5 | 1 | 10 | 2  | 0,0078675760,079901528 | 7,43E-08 | 0,001562433 |
| 225496_s_at    | N21426           | Hs.369520            | synaptotagmin-like 2                                      | SYTL2         | EG2 | 2 | 4 | 7  | 5  | 0,0078675760,079901528 | 7,43E-08 | 0,001562433 |
| 227326_at      | BE966768         | Hs.250723            | matrix-remodelling associated 7                           | MXRA7         | EG2 | 3 | 3 | 8  | 4  | 0,0078675760,079901528 | 7,43E-08 | 0,001562433 |
| 227345_at      | AI738556         | Hs.213467            | tumor necrosis factor receptor superfamily, member 1      | TNFRSF10D     | EG2 | 4 | 2 | 5  | 7  | 0,0078675760,079901528 | 7,43E-08 | 0,001562433 |
| 228754_at      | BG150485         | Hs.517819            | glutamate receptor interacting protein 2                  | GRIP2         | EG2 | 3 | 3 | 9  | 3  | 0,0078675760,079901528 | 7,43E-08 | 0,001562433 |
| 228774_at      | AW268594         | Hs.374421            | chromosome 9 open reading frame 81                        | C9orf81       | EG2 | 4 | 2 | 10 | 2  | 0,0078675760,079901528 | 7,43E-08 | 0,001562433 |
| 231798_at      | AL575177         | Hs.248201            | noggin                                                    | NOG           | EG2 | 1 | 5 | 6  | 6  | 0,0078675760,079901528 | 7,43E-08 | 0,001562433 |
| 232344_at      | AK021812         | Hs.553501            | RAS p21 protein activator (GTPase activating protein) 1   | RASA1         | EG2 | 2 | 4 | 5  | 7  | 0,0078675760,079901528 | 7,43E-08 | 0,001562433 |
| 242751_at      | N55072           | Hs.120               | peroxiredoxin 6                                           | PRDX6         | EG2 | 3 | 3 | 12 | 0  | 0,0078675760,079901528 | 7,43E-08 | 0,001562433 |
| 1552622_s_at   | BQ613856         | Hs.535030, Hs.556000 |                                                           | MGC13098      | EG2 | 2 | 4 | 4  | 7  | 0,0078675760,079901528 | 9,59E-07 | 0,001562433 |
| 202600_s_at    | AI824012         | Hs.155017            | nuclear receptor interacting protein 1                    | NRIP1         | EG2 | 5 | 1 | 1  | 10 | 0,0078675760,079901528 | 9,59E-07 | 0,001562433 |

|             |           |           |                                                             |               |     |   |   |    |    |                        |          |             |
|-------------|-----------|-----------|-------------------------------------------------------------|---------------|-----|---|---|----|----|------------------------|----------|-------------|
| 203989_x_at | NM_001992 | Hs.482562 | coagulation factor II (thrombin) receptor                   | F2R           | EG2 | 1 | 5 | 6  | 5  | 0,0078675760,079901528 | 9,59E-07 | 0,001562433 |
| 204497_at   | AB011092  | Hs.391860 | adenylate cyclase 9                                         | ADCY9         | EG2 | 1 | 5 | 4  | 7  | 0,0078675760,079901528 | 9,59E-07 | 0,001562433 |
| 204620_s_at | NM_004385 | Hs.443681 | chondroitin sulfate proteoglycan 2 (versican)               | CSPG2         | EG2 | 3 | 3 | 6  | 5  | 0,0078675760,079901528 | 9,59E-07 | 0,001562433 |
| 204863_s_at | BE856546  | Hs.454699 | H interleukin 6 signal transducer (gp130, oncostatin M re   | IL6ST         | EG2 | 6 | 0 | 2  | 9  | 0,0078675760,079901528 | 9,59E-07 | 0,001562433 |
| 205771_s_at | AL137063  | Hs.486483 | A kinase (PRKA) anchor protein 7                            | AKAP7         | EG2 | 4 | 2 | 3  | 8  | 0,0078675760,079901528 | 9,59E-07 | 0,001562433 |
| 206744_s_at | NM_014242 | Hs.530988 | zinc finger, MYM-type 5                                     | ZMYM5         | EG2 | 1 | 5 | 7  | 4  | 0,0078675760,079901528 | 9,59E-07 | 0,001562433 |
| 208003_s_at | NM_006599 | Hs.371987 | nuclear factor of activated T-cells 5, tonicity-responsiv   | NFAT5         | EG2 | 2 | 4 | 5  | 6  | 0,0078675760,079901528 | 9,59E-07 | 0,001562433 |
| 208998_at   | U94592    | Hs.80658  | uncoupling protein 2 (mitochondrial, proton carrier)        | UCP2          | EG2 | 3 | 3 | 4  | 7  | 0,0078675760,079901528 | 9,59E-07 | 0,001562433 |
| 209706_at   | AF247704  | Hs.55999  | NK3 transcription factor related, locus 1 (Drosophila)      | NKX3-1        | EG2 | 5 | 1 | 5  | 6  | 0,0078675760,079901528 | 9,59E-07 | 0,001562433 |
| 212624_s_at | BF339445  | Hs.380138 | chimerin (chimaerin) 1                                      | CHN1          | EG2 | 3 | 3 | 3  | 8  | 0,0078675760,079901528 | 9,59E-07 | 0,001562433 |
| 213506_at   | BE965369  | Hs.154299 | coagulation factor II (thrombin) receptor-like 1            | F2RL1         | EG2 | 0 | 6 | 2  | 9  | 0,0078675760,079901528 | 9,59E-07 | 0,001562433 |
| 214196_s_at | AA602532  | Hs.523454 | tripeptidyl peptidase I                                     | TPP1          | EG2 | 5 | 1 | 10 | 1  | 0,0078675760,079901528 | 9,59E-07 | 0,001562433 |
| 219587_at   | NM_017868 | Hs.288772 | tetratricopeptide repeat domain 12                          | TTC12         | EG2 | 3 | 3 | 4  | 7  | 0,0078675760,079901528 | 9,59E-07 | 0,001562433 |
| 221731_x_at | BF218922  | Hs.443681 | chondroitin sulfate proteoglycan 2 (versican)               | CSPG2         | EG2 | 3 | 3 | 6  | 5  | 0,0078675760,079901528 | 9,59E-07 | 0,001562433 |
| 223125_s_at | AL563236  | Hs.497159 | H chromosome 1 open reading frame 21                        | C1orf21       | EG2 | 4 | 2 | 4  | 7  | 0,0078675760,079901528 | 9,59E-07 | 0,001562433 |
| 223199_at   | AA404592  | Hs.515032 | MAP kinase interacting serine/threonine kinase 2            | MKMK2         | EG2 | 5 | 1 | 6  | 5  | 0,0078675760,079901528 | 9,59E-07 | 0,001562433 |
| 223484_at   | AF228422  | Hs.112242 |                                                             | NMES1         | EG2 | 2 | 4 | 6  | 5  | 0,0078675760,079901528 | 9,59E-07 | 0,001562433 |
| 225081_s_at | AK022955  | Hs.520245 | cell division cycle associated 7-like                       | CDCA7L        | EG2 | 3 | 3 | 5  | 6  | 0,0078675760,079901528 | 9,59E-07 | 0,001562433 |
| 225421_at   | AI654133  | Hs.356247 | aminoacylase 1-like 2                                       | ACY1L2        | EG2 | 4 | 2 | 2  | 9  | 0,0078675760,079901528 | 9,59E-07 | 0,001562433 |
| 226085_at   | AA181060  | Hs.349283 | chromobox homolog 5 (HP1 alpha homolog, Drosophil           | CBX5          | EG2 | 4 | 2 | 3  | 8  | 0,0078675760,079901528 | 9,59E-07 | 0,001562433 |
| 226707_at   | AI925574  | Hs.493164 | nicotinate phosphoribosyltransferase domain contain         | NAPRT1        | EG2 | 0 | 6 | 3  | 8  | 0,0078675760,079901528 | 9,59E-07 | 0,001562433 |
| 227917_at   | AW192692  |           |                                                             |               | EG2 | 0 | 6 | 2  | 9  | 0,0078675760,079901528 | 9,59E-07 | 0,001562433 |
| 228497_at   | AI279062  | Hs.125482 | solute carrier family 22 (organic cation transporter), m    | SLC22A15      | EG2 | 1 | 5 | 10 | 1  | 0,0078675760,079901528 | 9,59E-07 | 0,001562433 |
| 229515_at   | AA632147  | Hs.406074 | PRKC, apoptosis, WT1, regulator                             | PAWR          | EG2 | 5 | 1 | 4  | 7  | 0,0078675760,079901528 | 9,59E-07 | 0,001562433 |
| 235028_at   | BG288330  |           |                                                             |               | EG2 | 5 | 1 | 6  | 5  | 0,0078675760,079901528 | 9,59E-07 | 0,001562433 |
| 235106_at   | AW847318  | Hs.428214 | mastermind-like 2 (Drosophila)                              | MAML2         | EG2 | 4 | 2 | 1  | 10 | 0,0078675760,079901528 | 9,59E-07 | 0,001562433 |
| 238021_s_at | AA954994  | Hs.237396 |                                                             | LOC388279     | EG2 | 5 | 1 | 7  | 4  | 0,0078675760,079901528 | 9,59E-07 | 0,001562433 |
| 240690_at   | AI494291  | Hs.29068  |                                                             | DKFZp761P0423 | EG2 | 3 | 3 | 5  | 6  | 0,0078675760,079901528 | 9,59E-07 | 0,001562433 |
| 242467_at   | BF433200  | Hs.529862 | casein kinase 1, alpha 1                                    | CSNK1A1       | EG2 | 5 | 1 | 8  | 3  | 0,0078675760,079901528 | 9,59E-07 | 0,001562433 |
| 1552733_at  | NM_172193 | Hs.509258 | kelch domain containing 1                                   | KLHDC1        | EG2 | 4 | 2 | 5  | 5  | 0,0078675760,079901528 | 9,97E-06 | 0,001562433 |
| 1557270_at  | AA632049  |           |                                                             |               | EG2 | 6 | 0 | 3  | 7  | 0,0078675760,079901528 | 9,97E-06 | 0,001562433 |
| 1564796_at  | BC017854  | Hs.436298 | epithelial membrane protein 1                               | EMP1          | EG2 | 3 | 3 | 8  | 2  | 0,0078675760,079901528 | 9,97E-06 | 0,001562433 |
| 1569312_at  | BE383308  | Hs.301819 | zinc finger protein 146                                     | ZNF146        | EG2 | 5 | 1 | 7  | 3  | 0,0078675760,079901528 | 9,97E-06 | 0,001562433 |
| 201422_at   | NM_006332 | Hs.14623  | interferon, gamma-inducible protein 30                      | IFI30         | EG2 | 1 | 5 | 8  | 2  | 0,0078675760,079901528 | 9,97E-06 | 0,001562433 |
| 201427_s_at | NM_005410 | Hs.275775 | selenoprotein P, plasma, 1                                  | SEPP1         | EG2 | 4 | 2 | 6  | 4  | 0,0078675760,079901528 | 9,97E-06 | 0,001562433 |
| 202497_x_at | AI631159  | Hs.210227 | H solute carrier family 2 (facilitated glucose transporter) | SLC2A3        | EG2 | 4 | 2 | 6  | 4  | 0,0078675760,079901528 | 9,97E-06 | 0,001562433 |
| 202498_s_at | BE550486  | Hs.210227 | H solute carrier family 2 (facilitated glucose transporter) | SLC2A3        | EG2 | 4 | 2 | 5  | 5  | 0,0078675760,079901528 | 9,97E-06 | 0,001562433 |
| 203408_s_at | NM_002971 | Hs.517717 | special AT-rich sequence binding protein 1 (binds to n      | SATB1         | EG2 | 2 | 4 | 4  | 6  | 0,0078675760,079901528 | 9,97E-06 | 0,001562433 |
| 203946_s_at | U75667    | Hs.553485 | arginase, type II                                           | ARG2          | EG2 | 5 | 1 | 6  | 4  | 0,0078675760,079901528 | 9,97E-06 | 0,001562433 |
| 204783_at   | AI911434  | Hs.85195  | myeloid leukemia factor 1                                   | MLF1          | EG2 | 5 | 1 | 7  | 3  | 0,0078675760,079901528 | 9,97E-06 | 0,001562433 |
| 205128_x_at | NM_000962 | Hs.201978 | prostaglandin-endoperoxide synthase 1 (prostaglandi         | PTGS1         | EG2 | 4 | 2 | 6  | 4  | 0,0078675760,079901528 | 9,97E-06 | 0,001562433 |
| 205756_s_at | NM_000132 | Hs.413083 | coagulation factor VIII, procoagulant component (hem        | F8            | EG2 | 2 | 4 | 5  | 5  | 0,0078675760,079901528 | 9,97E-06 | 0,001562433 |
| 207231_at   | NM_014648 | Hs.409210 |                                                             | DZIP3         | EG2 | 2 | 4 | 3  | 7  | 0,0078675760,079901528 | 9,97E-06 | 0,001562433 |
| 207813_s_at | NM_004110 | Hs.69745  | ferredoxin reductase                                        | FDXR          | EG2 | 1 | 5 | 4  | 6  | 0,0078675760,079901528 | 9,97E-06 | 0,001562433 |
| 207980_s_at | NM_006079 | Hs.82071  | Cbp/p300-interacting transactivator, with Glu/Asp-rich      | CITED2        | EG2 | 1 | 5 | 3  | 7  | 0,0078675760,079901528 | 9,97E-06 | 0,001562433 |

|             |           |            |                                                          |               |     |   |   |    |    |                        |          |             |
|-------------|-----------|------------|----------------------------------------------------------|---------------|-----|---|---|----|----|------------------------|----------|-------------|
| 208190_s_at | NM_015925 | Hs.466507  |                                                          | LISCH7        | EG2 | 3 | 3 | 2  | 8  | 0,0078675760,079901528 | 9,97E-06 | 0,001562433 |
| 209754_s_at | AF113682  | Hs.11355   | thymopoietin                                             | TMPO          | EG2 | 3 | 3 | 3  | 7  | 0,0078675760,079901528 | 9,97E-06 | 0,001562433 |
| 209969_s_at | BC002704  | Hs.470943  | signal transducer and activator of transcription 1, 91kD | STAT1         | EG2 | 1 | 5 | 3  | 7  | 0,0078675760,079901528 | 9,97E-06 | 0,001562433 |
| 210538_s_at | U37546    | Hs.127799  | baculoviral IAP repeat-containing 3                      | BIRC3         | EG2 | 6 | 0 | 3  | 7  | 0,0078675760,079901528 | 9,97E-06 | 0,001562433 |
| 211085_s_at | Z25430    | Hs.472838  | serine/threonine kinase 4                                | STK4          | EG2 | 1 | 5 | 3  | 7  | 0,0078675760,079901528 | 9,97E-06 | 0,001562433 |
| 214085_x_at | AI912583  | Hs.205558  | HIV-1 rev binding protein 2                              | HRB2          | EG2 | 6 | 0 | 5  | 5  | 0,0078675760,079901528 | 9,97E-06 | 0,001562433 |
| 214252_s_at | AV700514  | Hs.30213   | ceroid-lipofuscinosis, neuronal 5                        | CLN5          | EG2 | 3 | 3 | 4  | 6  | 0,0078675760,079901528 | 9,97E-06 | 0,001562433 |
| 215646_s_at | R94644    | Hs.443681  | chondroitin sulfate proteoglycan 2 (versican)            | CSPG2         | EG2 | 4 | 2 | 5  | 5  | 0,0078675760,079901528 | 9,97E-06 | 0,001562433 |
| 216870_x_at | AF264787  | Hs.508041  | deleted in lymphocytic leukemia, 2                       | DLEU2         | EG2 | 5 | 1 | 4  | 6  | 0,0078675760,079901528 | 9,97E-06 | 0,001562433 |
| 217127_at   | AL354872  | Hs.19904   | cystathionase (cystathionine gamma-lyase)                | CTH           | EG2 | 6 | 0 | 7  | 3  | 0,0078675760,079901528 | 9,97E-06 | 0,001562433 |
| 217165_x_at | M10943    | Hs.513626  | metallothionein 1F (functional)                          | MT1F          | EG2 | 2 | 4 | 5  | 5  | 0,0078675760,079901528 | 9,97E-06 | 0,001562433 |
| 217208_s_at | AL121981  | Hs.292549  | discs, large homolog 1 (Drosophila)                      | DLG1          | EG2 | 4 | 2 | 6  | 4  | 0,0078675760,079901528 | 9,97E-06 | 0,001562433 |
| 218701_at   | NM_016027 | Hs.118554  | lactamase, beta 2                                        | LACTB2        | EG2 | 3 | 3 | 4  | 6  | 0,0078675760,079901528 | 9,97E-06 | 0,001562433 |
| 218726_at   | NM_018410 | Hs.532968  |                                                          | DKFZp762E1312 | EG2 | 5 | 1 | 3  | 7  | 0,0078675760,079901528 | 9,97E-06 | 0,001562433 |
| 219209_at   | NM_022168 | Hs.163173  | interferon induced with helicase C domain 1              | IFIH1         | EG2 | 2 | 4 | 2  | 8  | 0,0078675760,079901528 | 9,97E-06 | 0,001562433 |
| 219250_s_at | NM_013281 | Hs.41296   | fibronectin leucine rich transmembrane protein 3         | FLRT3         | EG2 | 0 | 6 | 4  | 6  | 0,0078675760,079901528 | 9,97E-06 | 0,001562433 |
| 219493_at   | NM_024745 | Hs.123253  | SHC SH2-domain binding protein 1                         | SHCBP1        | EG2 | 5 | 1 | 3  | 7  | 0,0078675760,079901528 | 9,97E-06 | 0,001562433 |
| 219684_at   | NM_022147 | Hs.43388   |                                                          | IFRG28        | EG2 | 0 | 6 | 0  | 10 | 0,0078675760,079901528 | 9,97E-06 | 0,001562433 |
| 221207_s_at | NM_015678 | Hs.491172  | neurobeachin                                             | NBEA          | EG2 | 4 | 2 | 2  | 8  | 0,0078675760,079901528 | 9,97E-06 | 0,001562433 |
| 221922_at   | AW195581  | Hs.489353  | G-protein signalling modulator 2 (AGS3-like, C. elegan   | GPSM2         | EG2 | 3 | 3 | 4  | 6  | 0,0078675760,079901528 | 9,97E-06 | 0,001562433 |
| 222787_s_at | AV705186  | Hs.396358  |                                                          | FLJ11273      | EG2 | 2 | 4 | 2  | 8  | 0,0078675760,079901528 | 9,97E-06 | 0,001562433 |
| 223681_s_at | AB044807  | Hs.478125  | InaD-like (Drosophila)                                   | INADL         | EG2 | 2 | 4 | 0  | 10 | 0,0078675760,079901528 | 9,97E-06 | 0,001562433 |
| 225626_at   | AK000680  | Hs.266175, | H phosphoprotein associated with glycosphingolipid mi    | PAG1          | EG2 | 4 | 2 | 6  | 4  | 0,0078675760,079901528 | 9,97E-06 | 0,001562433 |
| 226218_at   | BE217880  | Hs.362807  | interleukin 7 receptor                                   | IL7R          | EG2 | 4 | 2 | 4  | 6  | 0,0078675760,079901528 | 9,97E-06 | 0,001562433 |
| 226239_at   | AL573722  | Hs.356187  |                                                          | FLJ90024      | EG2 | 0 | 6 | 8  | 2  | 0,0078675760,079901528 | 9,97E-06 | 0,001562433 |
| 226939_at   | AI202327  | Hs.374216  | cytoplasmic polyadenylation element binding protein      | CPEB2         | EG2 | 6 | 0 | 10 | 0  | 0,0078675760,079901528 | 9,97E-06 | 0,001562433 |
| 227124_at   | AI870473  |            |                                                          |               | EG2 | 6 | 0 | 8  | 2  | 0,0078675760,079901528 | 9,97E-06 | 0,001562433 |
| 227156_at   | AK025872  | Hs.3327    | trinucleotide repeat containing 8                        | TNRC8         | EG2 | 4 | 2 | 1  | 9  | 0,0078675760,079901528 | 9,97E-06 | 0,001562433 |
| 227458_at   | AI608902  | Hs.521989  | CD274 antigen                                            | CD274         | EG2 | 4 | 2 | 9  | 1  | 0,0078675760,079901528 | 9,97E-06 | 0,001562433 |
| 227462_at   | BE889628  | Hs.482910  |                                                          | LRAP          | EG2 | 3 | 3 | 3  | 7  | 0,0078675760,079901528 | 9,97E-06 | 0,001562433 |
| 228171_s_at | AI056683  | Hs.188781  | pleckstrin homology domain containing, family G (wit     | PLEKHG4       | EG2 | 2 | 4 | 4  | 6  | 0,0078675760,079901528 | 9,97E-06 | 0,001562433 |
| 228480_at   | AW296039  | Hs.165195  | VAMP (vesicle-associated membrane protein)-associa       | VAPA          | EG2 | 1 | 5 | 5  | 5  | 0,0078675760,079901528 | 9,97E-06 | 0,001562433 |
| 232235_at   | AK021539  | Hs.124673  | chromosome 18 open reading frame 4                       | C18orf4       | EG2 | 4 | 2 | 2  | 8  | 0,0078675760,079901528 | 9,97E-06 | 0,001562433 |
| 234994_at   | AA088177  | Hs.172870  | KIAA1913                                                 | KIAA1913      | EG2 | 3 | 3 | 5  | 5  | 0,0078675760,079901528 | 9,97E-06 | 0,001562433 |
| 235274_at   | AA740632  |            |                                                          |               | EG2 | 5 | 1 | 3  | 7  | 0,0078675760,079901528 | 9,97E-06 | 0,001562433 |
| 235547_at   | BG548427  | Hs.507680  |                                                          | PFAAP5        | EG2 | 5 | 1 | 5  | 5  | 0,0078675760,079901528 | 9,97E-06 | 0,001562433 |
| 236046_at   | AA781880  | Hs.293833  |                                                          | FLJ44896      | EG2 | 2 | 4 | 4  | 6  | 0,0078675760,079901528 | 9,97E-06 | 0,001562433 |
| 238458_at   | AI868167  | Hs.403594  | EF-hand domain family, member A2                         | EFHA2         | EG2 | 2 | 4 | 3  | 7  | 0,0078675760,079901528 | 9,97E-06 | 0,001562433 |
| 238587_at   | AI927919  | Hs.444075  |                                                          | STS-1         | EG2 | 3 | 3 | 4  | 6  | 0,0078675760,079901528 | 9,97E-06 | 0,001562433 |
| 239413_at   | AI130715  | Hs.443005  |                                                          | Cep152        | EG2 | 6 | 0 | 5  | 5  | 0,0078675760,079901528 | 9,97E-06 | 0,001562433 |
| 239866_at   | AA705933  |            |                                                          |               | EG2 | 2 | 4 | 4  | 6  | 0,0078675760,079901528 | 9,97E-06 | 0,001562433 |
| 240146_at   | AW418562  | Hs.446123  | capping protein (actin filament) muscle Z-line, alpha 2  | CAPZA2        | EG2 | 4 | 2 | 6  | 4  | 0,0078675760,079901528 | 9,97E-06 | 0,001562433 |
| 240307_at   | N54783    | Hs.269099  | far upstream element (FUSE) binding protein 1            | FUBP1         | EG2 | 2 | 4 | 6  | 4  | 0,0078675760,079901528 | 9,97E-06 | 0,001562433 |
| 241879_at   | AW511222  |            |                                                          |               | EG2 | 6 | 0 | 5  | 5  | 0,0078675760,079901528 | 9,97E-06 | 0,001562433 |
| 1557081_at  | AA580691  | Hs.531106  | RNA binding motif protein 25                             | RBM25         | EG2 | 3 | 3 | 4  | 5  | 0,0078675760,079901528 | 8,42E-05 | 0,002977773 |

|             |           |                      |                                                          |           |     |   |   |   |   |                        |          |             |
|-------------|-----------|----------------------|----------------------------------------------------------|-----------|-----|---|---|---|---|------------------------|----------|-------------|
| 1558522_at  | BC013077  | Hs.533355            | membrane protein, palmitoylated 6 (MAGUK p55 subf        | MPP6      | EG2 | 4 | 2 | 4 | 5 | 0,0078675760,079901528 | 8,42E-05 | 0,002977773 |
| 200897_s_at | NM_016081 | Hs.151220            |                                                          | KIAA0992  | EG2 | 4 | 2 | 5 | 4 | 0,0078675760,079901528 | 8,42E-05 | 0,002977773 |
| 201389_at   | NM_002205 | Hs.505654            | integrin, alpha 5 (fibronectin receptor, alpha polypept  | ITGA5     | EG2 | 3 | 3 | 5 | 4 | 0,0078675760,079901528 | 8,42E-05 | 0,002977773 |
| 201810_s_at | AL562152  | Hs.257761            | SH3-domain binding protein 5 (BTK-associated)            | SH3BP5    | EG2 | 0 | 6 | 5 | 4 | 0,0078675760,079901528 | 8,42E-05 | 0,002977773 |
| 202284_s_at | NM_000389 | Hs.370771            | cyclin-dependent kinase inhibitor 1A (p21, Cip1)         | CDKN1A    | EG2 | 6 | 0 | 6 | 3 | 0,0078675760,079901528 | 8,42E-05 | 0,002977773 |
| 202409_at   | X07868    | Hs.523414, Hs.556244 |                                                          | LOC492304 | EG2 | 2 | 4 | 2 | 7 | 0,0078675760,079901528 | 8,42E-05 | 0,002977773 |
| 202870_s_at | NM_001255 | Hs.524947            | CDC20 cell division cycle 20 homolog (S. cerevisiae)     | CDC20     | EG2 | 3 | 3 | 3 | 6 | 0,0078675760,079901528 | 8,42E-05 | 0,002977773 |
| 202973_x_at | NM_014883 | Hs.97270, Hs         | family with sequence similarity 13, member A1            | FAM13A1   | EG2 | 2 | 4 | 5 | 4 | 0,0078675760,079901528 | 8,42E-05 | 0,002977773 |
| 203016_s_at | AK001710  | Hs.22587             | synovial sarcoma, X breakpoint 2 interacting protein     | SSX2IP    | EG2 | 5 | 1 | 7 | 2 | 0,0078675760,079901528 | 8,42E-05 | 0,002977773 |
| 203603_s_at | NM_014795 | Hs.34871             | zinc finger homeobox 1b                                  | ZFXH1B    | EG2 | 5 | 1 | 6 | 3 | 0,0078675760,079901528 | 8,42E-05 | 0,002977773 |
| 203680_at   | NM_002736 | Hs.433068            | protein kinase, cAMP-dependent, regulatory, type II,     | PRKAR2B   | EG2 | 5 | 1 | 6 | 3 | 0,0078675760,079901528 | 8,42E-05 | 0,002977773 |
| 203867_s_at | NM_018096 | Hs.85570             | notchless homolog 1 (Drosophila)                         | NLE1      | EG2 | 2 | 4 | 6 | 3 | 0,0078675760,079901528 | 8,42E-05 | 0,002977773 |
| 204015_s_at | BC002671  | Hs.417962            | dual specificity phosphatase 4                           | DUSP4     | EG2 | 2 | 4 | 3 | 6 | 0,0078675760,079901528 | 8,42E-05 | 0,002977773 |
| 204066_s_at | NM_014914 | Hs.435039            | centaurin, gamma 2                                       | CENTG2    | EG2 | 1 | 5 | 6 | 3 | 0,0078675760,079901528 | 8,42E-05 | 0,002977773 |
| 204506_at   | AL544951  | Hs.280604            | protein phosphatase 3 (formerly 2B), regulatory subu     | PPP3R1    | EG2 | 5 | 1 | 2 | 7 | 0,0078675760,079901528 | 8,42E-05 | 0,002977773 |
| 204686_at   | NM_005544 | Hs.471508            | insulin receptor substrate 1                             | IRS1      | EG2 | 3 | 3 | 3 | 6 | 0,0078675760,079901528 | 8,42E-05 | 0,002977773 |
| 204796_at   | AI825937  | Hs.12451             | echinoderm microtubule associated protein like 1         | EML1      | EG2 | 3 | 3 | 5 | 4 | 0,0078675760,079901528 | 8,42E-05 | 0,002977773 |
| 204900_x_at | NM_003864 | Hs.413835            | sin3-associated polypeptide, 30kDa                       | SAP30     | EG2 | 3 | 3 | 6 | 3 | 0,0078675760,079901528 | 8,42E-05 | 0,002977773 |
| 205259_at   | NM_000901 | Hs.163924            | nuclear receptor subfamily 3, group C, member 2          | NR3C2     | EG2 | 3 | 3 | 2 | 7 | 0,0078675760,079901528 | 8,42E-05 | 0,002977773 |
| 205398_s_at | NM_005902 | Hs.36915, Hs         | SMAD, mothers against DPP homolog 3 (Drosophila)         | SMAD3     | EG2 | 1 | 5 | 5 | 4 | 0,0078675760,079901528 | 8,42E-05 | 0,002977773 |
| 205802_at   | NM_003304 | Hs.250687            | transient receptor potential cation channel, subfamily   | TRPC1     | EG2 | 3 | 3 | 2 | 7 | 0,0078675760,079901528 | 8,42E-05 | 0,002977773 |
| 207029_at   | NM_000899 | Hs.1048              | KIT ligand                                               | KITLG     | EG2 | 5 | 1 | 4 | 5 | 0,0078675760,079901528 | 8,42E-05 | 0,002977773 |
| 207417_s_at | NM_003451 | Hs.172979            | zinc finger protein 177                                  | ZNF177    | EG2 | 1 | 5 | 4 | 5 | 0,0078675760,079901528 | 8,42E-05 | 0,002977773 |
| 207426_s_at | NM_003326 | Hs.181097            | tumor necrosis factor (ligand) superfamily, member 4     | TNFSF4    | EG2 | 2 | 4 | 6 | 3 | 0,0078675760,079901528 | 8,42E-05 | 0,002977773 |
| 208534_s_at | NM_006989 | Hs.520599            | RAS p21 protein activator 4                              | RASA4     | EG2 | 1 | 5 | 4 | 5 | 0,0078675760,079901528 | 8,42E-05 | 0,002977773 |
| 208663_s_at | AI652848  | Hs.368214            | tetratricopeptide repeat domain 3                        | TTC3      | EG2 | 2 | 4 | 6 | 3 | 0,0078675760,079901528 | 8,42E-05 | 0,002977773 |
| 208710_s_at | AI424923  | Hs.512815            | adaptor-related protein complex 3, delta 1 subunit       | AP3D1     | EG2 | 0 | 6 | 3 | 6 | 0,0078675760,079901528 | 8,42E-05 | 0,002977773 |
| 209278_s_at | L27624    | Hs.438231            | tissue factor pathway inhibitor 2                        | TFPI2     | EG2 | 2 | 4 | 4 | 5 | 0,0078675760,079901528 | 8,42E-05 | 0,002977773 |
| 209714_s_at | AF213033  | Hs.84113             | cyclin-dependent kinase inhibitor 3 (CDK2-associated)    | CDKN3     | EG2 | 4 | 2 | 3 | 6 | 0,0078675760,079901528 | 8,42E-05 | 0,002977773 |
| 209782_s_at | U79283    | Hs.414480            | D site of albumin promoter (albumin D-box) binding p     | DBP       | EG2 | 0 | 6 | 0 | 9 | 0,0078675760,079901528 | 8,42E-05 | 0,002977773 |
| 210785_s_at | AB035482  | Hs.10649             | chromosome 1 open reading frame 38                       | C1orf38   | EG2 | 2 | 4 | 6 | 3 | 0,0078675760,079901528 | 8,42E-05 | 0,002977773 |
| 211115_x_at | AB037703  | Hs.533862            | survival of motor neuron protein interacting protein 1   | SIP1      | EG2 | 5 | 1 | 6 | 3 | 0,0078675760,079901528 | 8,42E-05 | 0,002977773 |
| 211302_s_at | L20966    | Hs.198072            | phosphodiesterase 4B, cAMP-specific (phosphodieste       | PDE4B     | EG2 | 4 | 2 | 5 | 4 | 0,0078675760,079901528 | 8,42E-05 | 0,002977773 |
| 211343_s_at | M33653    | Hs.211933            | collagen, type XIII, alpha 1                             | COL13A1   | EG2 | 3 | 3 | 6 | 3 | 0,0078675760,079901528 | 8,42E-05 | 0,002977773 |
| 211596_s_at | AB050468  | Hs.518055            | leucine-rich repeats and immunoglobulin-like domain      | LRIG1     | EG2 | 1 | 5 | 2 | 7 | 0,0078675760,079901528 | 8,42E-05 | 0,002977773 |
| 211602_s_at | U31110    | Hs.250687            | transient receptor potential cation channel, subfamily   | TRPC1     | EG2 | 4 | 2 | 5 | 4 | 0,0078675760,079901528 | 8,42E-05 | 0,002977773 |
| 211653_x_at | M33376    | Hs.460260, H         | aldo-keto reductase family 1, member C2 (dihydrodiol     | AKR1C2    | EG2 | 3 | 3 | 5 | 4 | 0,0078675760,079901528 | 8,42E-05 | 0,002977773 |
| 212022_s_at | BF001806  | Hs.80976             | antigen identified by monoclonal antibody Ki-67          | MKI67     | EG2 | 4 | 2 | 3 | 6 | 0,0078675760,079901528 | 8,42E-05 | 0,002977773 |
| 212543_at   | U83115    | Hs.486074            | absent in melanoma 1                                     | AIM1      | EG2 | 4 | 2 | 3 | 6 | 0,0078675760,079901528 | 8,42E-05 | 0,002977773 |
| 212758_s_at | AI373166  | Hs.124503            | transcription factor 8 (represses interleukin 2 expressi | TCF8      | EG2 | 4 | 2 | 2 | 7 | 0,0078675760,079901528 | 8,42E-05 | 0,002977773 |
| 212812_at   | AI700633  |                      |                                                          |           | EG2 | 5 | 1 | 2 | 7 | 0,0078675760,079901528 | 8,42E-05 | 0,002977773 |
| 212913_at   | BE674960  | Hs.371225            | mutS homolog 5 (E. coli)                                 | MSH5      | EG2 | 6 | 0 | 4 | 5 | 0,0078675760,079901528 | 8,42E-05 | 0,002977773 |
| 213006_at   | AV655640  | Hs.440829            | CCAAT/enhancer binding protein (C/EBP), delta            | CEBPD     | EG2 | 1 | 5 | 3 | 6 | 0,0078675760,079901528 | 8,42E-05 | 0,002977773 |
| 213035_at   | AI081194  | Hs.335239            | ankyrin repeat domain 28                                 | ANKRD28   | EG2 | 3 | 3 | 7 | 2 | 0,0078675760,079901528 | 8,42E-05 | 0,002977773 |
| 213338_at   | BF062629  | Hs.35861             |                                                          | RIS1      | EG2 | 4 | 2 | 8 | 1 | 0,0078675760,079901528 | 8,42E-05 | 0,002977773 |

|             |           |                      |                                                      |               |     |   |   |   |   |                        |          |             |
|-------------|-----------|----------------------|------------------------------------------------------|---------------|-----|---|---|---|---|------------------------|----------|-------------|
| 213908_at   | AI824078  | Hs.212670, Hs.513595 |                                                      | LOC339005     | EG2 | 4 | 2 | 4 | 5 | 0,0078675760,079901528 | 8,42E-05 | 0,002977773 |
| 214255_at   | N35112    | Hs.128041            | ATPase, Class V, type 10A                            | ATP10A        | EG2 | 1 | 5 | 4 | 5 | 0,0078675760,079901528 | 8,42E-05 | 0,002977773 |
| 214933_at   | AA769818  | Hs.408449            | calcium channel, voltage-dependent, P/Q type, alpha  | CACNA1A       | EG2 | 1 | 5 | 6 | 3 | 0,0078675760,079901528 | 8,42E-05 | 0,002977773 |
| 217838_s_at | NM_016337 | Hs.125867            | Enah/Vasp-like                                       | EVL           | EG2 | 0 | 6 | 2 | 7 | 0,0078675760,079901528 | 8,42E-05 | 0,002977773 |
| 218475_at   | NM_022727 | Hs.552590            |                                                      | HTF9C         | EG2 | 0 | 6 | 4 | 5 | 0,0078675760,079901528 | 8,42E-05 | 0,002977773 |
| 218729_at   | NM_020169 | Hs.478067            | latexin                                              | LXN           | EG2 | 0 | 6 | 2 | 7 | 0,0078675760,079901528 | 8,42E-05 | 0,002977773 |
| 218747_s_at | NM_018009 | Hs.504597            | TAP binding protein-like                             | TAPBPL        | EG2 | 0 | 6 | 6 | 3 | 0,0078675760,079901528 | 8,42E-05 | 0,002977773 |
| 219918_s_at | NM_018123 | Hs.121028            | asp (abnormal spindle)-like, microcephaly associated | ASPM          | EG2 | 3 | 3 | 3 | 6 | 0,0078675760,079901528 | 8,42E-05 | 0,002977773 |
| 221561_at   | L21934    | Hs.496383            | sterol O-acyltransferase (acyl-Coenzyme A: cholester | SOAT1         | EG2 | 4 | 2 | 3 | 6 | 0,0078675760,079901528 | 8,42E-05 | 0,002977773 |
| 222680_s_at | AK001261  | Hs.126774            | denticleless homolog (Drosophila)                    | DTL           | EG2 | 3 | 3 | 4 | 5 | 0,0078675760,079901528 | 8,42E-05 | 0,002977773 |
| 223194_s_at | AL512737  | Hs.132340            | chromosome 6 open reading frame 85                   | C6orf85       | EG2 | 3 | 3 | 1 | 8 | 0,0078675760,079901528 | 8,42E-05 | 0,002977773 |
| 223257_at   | AI823905  | Hs.509008            | KIAA1333                                             | KIAA1333      | EG2 | 6 | 0 | 5 | 4 | 0,0078675760,079901528 | 8,42E-05 | 0,002977773 |
| 224828_at   | AV704132  | Hs.127126            | cytoplasmic polyadenylation element binding protein  | CPEB4         | EG2 | 4 | 2 | 8 | 1 | 0,0078675760,079901528 | 8,42E-05 | 0,002977773 |
| 224840_at   | AI753747  | Hs.407190            | FK506 binding protein 5                              | FKBP5         | EG2 | 5 | 1 | 3 | 6 | 0,0078675760,079901528 | 8,42E-05 | 0,002977773 |
| 224860_at   | AL137489  | Hs.7517              | chromosome 9 open reading frame 123                  | C9orf123      | EG2 | 2 | 4 | 5 | 4 | 0,0078675760,079901528 | 8,42E-05 | 0,002977773 |
| 224901_at   | AL571375  | Hs.379191            | stearoyl-CoA desaturase 5                            | SCD5          | EG2 | 2 | 4 | 7 | 2 | 0,0078675760,079901528 | 8,42E-05 | 0,002977773 |
| 225177_at   | AA143793  | Hs.191179            | RAB11 family interacting protein 1 (class I)         | RAB11FIP1     | EG2 | 3 | 3 | 2 | 7 | 0,0078675760,079901528 | 8,42E-05 | 0,002977773 |
| 225214_at   | AI762915  | Hs.213470            | proteasome (prosome, macropain) subunit, beta type   | PSMB7         | EG2 | 4 | 2 | 7 | 2 | 0,0078675760,079901528 | 8,42E-05 | 0,002977773 |
| 225582_at   | AA425726  | Hs.523252            | KIAA1754                                             | KIAA1754      | EG2 | 4 | 2 | 8 | 1 | 0,0078675760,079901528 | 8,42E-05 | 0,002977773 |
| 226200_at   | BE222664  | Hs.102910            | valyl-tRNA synthetase like                           | VARSL         | EG2 | 0 | 6 | 5 | 4 | 0,0078675760,079901528 | 8,42E-05 | 0,002977773 |
| 226275_at   | AI188653  | Hs.468908            | MAX dimerization protein 1                           | MXD1          | EG2 | 5 | 1 | 8 | 1 | 0,0078675760,079901528 | 8,42E-05 | 0,002977773 |
| 226456_at   | AW138157  | Hs.347524            |                                                      | MGC24665      | EG2 | 3 | 3 | 2 | 7 | 0,0078675760,079901528 | 8,42E-05 | 0,002977773 |
| 226905_at   | BG036514  | Hs.345588            |                                                      | MGC45871      | EG2 | 3 | 3 | 5 | 4 | 0,0078675760,079901528 | 8,42E-05 | 0,002977773 |
| 226982_at   | AI745624  | Hs.192221,           | H elongation factor, RNA polymerase II, 2            | ELL2          | EG2 | 6 | 0 | 5 | 4 | 0,0078675760,079901528 | 8,42E-05 | 0,002977773 |
| 227020_at   | BE502982  | Hs.463613            | yippee-like 2 (Drosophila)                           | YPEL2         | EG2 | 1 | 5 | 1 | 8 | 0,0078675760,079901528 | 8,42E-05 | 0,002977773 |
| 227062_at   | AU155361  | Hs.523789            |                                                      | TncRNA        | EG2 | 3 | 3 | 4 | 5 | 0,0078675760,079901528 | 8,42E-05 | 0,002977773 |
| 227176_at   | AL565362  | Hs.249829            |                                                      | FLJ40126      | EG2 | 5 | 1 | 6 | 3 | 0,0078675760,079901528 | 8,42E-05 | 0,002977773 |
| 227501_at   | AI377135  | Hs.446017            | WD repeat and SOCS box-containing 1                  | WSB1          | EG2 | 4 | 2 | 6 | 3 | 0,0078675760,079901528 | 8,42E-05 | 0,002977773 |
| 227755_at   | AA042983  |                      |                                                      |               | EG2 | 2 | 4 | 7 | 2 | 0,0078675760,079901528 | 8,42E-05 | 0,002977773 |
| 227793_at   | AA969238  | Hs.213065            |                                                      | LOC158257     | EG2 | 5 | 1 | 5 | 4 | 0,0078675760,079901528 | 8,42E-05 | 0,002977773 |
| 227868_at   | AI928764  | Hs.511547, Hs.532236 |                                                      | LOC154761     | EG2 | 0 | 6 | 3 | 6 | 0,0078675760,079901528 | 8,42E-05 | 0,002977773 |
| 228287_at   | BG054893  | Hs.471876,           | H inhibitor of growth family, member 5               | ING5          | EG2 | 4 | 2 | 4 | 5 | 0,0078675760,079901528 | 8,42E-05 | 0,002977773 |
| 228393_s_at | BF508739  | Hs.436350            | zinc finger protein 302                              | ZNF302        | EG2 | 3 | 3 | 5 | 4 | 0,0078675760,079901528 | 8,42E-05 | 0,002977773 |
| 229800_at   | AI129626  | Hs.507755            | doublecortin and CaM kinase-like 1                   | DCAMKL1       | EG2 | 3 | 3 | 4 | 5 | 0,0078675760,079901528 | 8,42E-05 | 0,002977773 |
| 230629_s_at | AI809582  | Hs.507307            | E1A binding protein p400                             | EP400         | EG2 | 1 | 5 | 3 | 6 | 0,0078675760,079901528 | 8,42E-05 | 0,002977773 |
| 230733_at   | H98113    | Hs.190086            |                                                      | MRCL3         | EG2 | 4 | 2 | 9 | 0 | 0,0078675760,079901528 | 8,42E-05 | 0,002977773 |
| 230793_at   | BE671038  | Hs.116470            | leucine rich repeat containing 16                    | LRRC16        | EG2 | 5 | 1 | 3 | 6 | 0,0078675760,079901528 | 8,42E-05 | 0,002977773 |
| 231035_s_at | AI697976  | Hs.499042            | OTU domain containing 1                              | OTUD1         | EG2 | 2 | 4 | 6 | 3 | 0,0078675760,079901528 | 8,42E-05 | 0,002977773 |
| 231727_s_at | NM_020679 | Hs.325631            |                                                      | AD023         | EG2 | 3 | 3 | 7 | 2 | 0,0078675760,079901528 | 8,42E-05 | 0,002977773 |
| 232021_at   | AI864273  | Hs.259347            |                                                      | LOC283464     | EG2 | 4 | 2 | 6 | 3 | 0,0078675760,079901528 | 8,42E-05 | 0,002977773 |
| 232535_at   | AL133570  |                      |                                                      |               | EG2 | 5 | 1 | 3 | 6 | 0,0078675760,079901528 | 8,42E-05 | 0,002977773 |
| 233401_at   | BF723605  | Hs.21422             | neuronal cell adhesion molecule                      | NRCAM         | EG2 | 4 | 2 | 4 | 5 | 0,0078675760,079901528 | 8,42E-05 | 0,002977773 |
| 235085_at   | BF739767  | Hs.29068             |                                                      | DKFZp761P0423 | EG2 | 1 | 5 | 4 | 5 | 0,0078675760,079901528 | 8,42E-05 | 0,002977773 |
| 235289_at   | AV747725  | Hs.164144            | eukaryotic translation initiation factor 5A2         | EIF5A2        | EG2 | 5 | 1 | 7 | 2 | 0,0078675760,079901528 | 8,42E-05 | 0,002977773 |
| 236075_s_at | AI693543  | Hs.279914            | zinc finger protein 232                              | ZNF232        | EG2 | 3 | 3 | 3 | 6 | 0,0078675760,079901528 | 8,42E-05 | 0,002977773 |



|                |                  |            |                                                           |          |     |   |   |    |    |                        |          |             |
|----------------|------------------|------------|-----------------------------------------------------------|----------|-----|---|---|----|----|------------------------|----------|-------------|
| 236599_at      | AA703280         | Hs.38449   | serpin peptidase inhibitor, clade E (nexin, plasminoge    | SERPINE2 | EG2 | 3 | 3 | 9  | 0  | 0,0078675760,079901528 | 8,42E-05 | 0,002977773 |
| 236834_at      | AI025103         | Hs.302287  | sec1 family domain containing 2                           | SCFD2    | EG2 | 2 | 4 | 6  | 3  | 0,0078675760,079901528 | 8,42E-05 | 0,002977773 |
| 239944_at      | AA431379         |            |                                                           |          | EG2 | 2 | 4 | 6  | 3  | 0,0078675760,079901528 | 8,42E-05 | 0,002977773 |
| 240282_at      | AW770902         | Hs.128548  | WD repeat domain 1                                        | WDR1     | EG2 | 3 | 3 | 7  | 2  | 0,0078675760,079901528 | 8,42E-05 | 0,002977773 |
| 242029_at      | N32832           | Hs.159430  | fibronectin type III domain containing 3B                 | FNDC3B   | EG2 | 5 | 1 | 8  | 1  | 0,0078675760,079901528 | 8,42E-05 | 0,002977773 |
| 242463_x_at    | AI620827         | Hs.166312  | zinc finger protein 600                                   | ZNF600   | EG2 | 5 | 1 | 8  | 1  | 0,0078675760,079901528 | 8,42E-05 | 0,002977773 |
| 243747_at      | AI222019         | Hs.368375  | zinc finger protein 599                                   | ZNF599   | EG2 | 3 | 3 | 3  | 6  | 0,0078675760,079901528 | 8,42E-05 | 0,002977773 |
| 244433_at      | AI950023         |            |                                                           |          | EG2 | 3 | 3 | 8  | 1  | 0,0078675760,079901528 | 8,42E-05 | 0,002977773 |
| 244623_at      | BF513800         |            |                                                           |          | EG2 | 4 | 2 | 7  | 2  | 0,0078675760,079901528 | 8,42E-05 | 0,002977773 |
| 37152_at       | L07592           | Hs.485196  | peroxisome proliferative activated receptor, delta        | PPARD    | EG2 | 0 | 6 | 0  | 9  | 0,0078675760,079901528 | 8,42E-05 | 0,002977773 |
| AFFX-r2-Bs-lys | AFFX-R2-BS-LYS-M |            |                                                           |          | EG2 | 3 | 3 | 4  | 5  | 0,0078675760,079901528 | 8,42E-05 | 0,002977773 |
| 222912_at      | BE207758         | Hs.503284  | arrestin, beta 1                                          | ARRB1    | EG2 | 0 | 5 | 8  | 9  | 0,03340802 0,201243287 | 3,06E-15 | 0,001562433 |
| 212811_x_at    | AI889380         | Hs.323878  | solute carrier family 1 (glutamate/neutral amino acid t   | SLC1A4   | EG2 | 4 | 1 | 9  | 7  | 0,03340802 0,201243287 | 1,94E-13 | 0,001562433 |
| 218145_at      | NM_021158        | Hs.516826  | tribbles homolog 3 (Drosophila)                           | TRIB3    | EG2 | 0 | 5 | 10 | 5  | 0,03340802 0,201243287 | 7,74E-12 | 0,001562433 |
| 203542_s_at    | AI690205         | Hs.150557  | Kruppel-like factor 9                                     | KLF9     | EG2 | 3 | 2 | 3  | 11 | 0,03340802 0,201243287 | 2,17E-10 | 0,001562433 |
| 212675_s_at    | AB011154         | Hs.146007  | KIAA0582                                                  | KIAA0582 | EG2 | 1 | 4 | 3  | 11 | 0,03340802 0,201243287 | 2,17E-10 | 0,001562433 |
| 213524_s_at    | NM_015714        | Hs.432132  | G0/G1switch 2                                             | G0S2     | EG2 | 2 | 3 | 9  | 4  | 0,03340802 0,201243287 | 4,56E-09 | 0,001562433 |
| 225646_at      | AI246687         | Hs.128065  | cathepsin C                                               | CTSC     | EG2 | 2 | 3 | 8  | 5  | 0,03340802 0,201243287 | 4,56E-09 | 0,001562433 |
| 235408_x_at    | AW058673         | Hs.250693  | zinc finger protein 117 (HPF9)                            | ZNF117   | EG2 | 3 | 2 | 3  | 10 | 0,03340802 0,201243287 | 4,56E-09 | 0,001562433 |
| 1555950_a_at   | CA448665         | Hs.527653  | decay accelerating factor for complement (CD55, Cro       | DAF      | EG2 | 3 | 2 | 6  | 6  | 0,03340802 0,201243287 | 7,43E-08 | 0,001562433 |
| 200907_s_at    | AU157932         | Hs.151220  |                                                           | KIAA0992 | EG2 | 4 | 1 | 6  | 6  | 0,03340802 0,201243287 | 7,43E-08 | 0,001562433 |
| 202388_at      | NM_002923        | Hs.78944   | regulator of G-protein signalling 2, 24kDa                | RGS2     | EG2 | 1 | 4 | 7  | 5  | 0,03340802 0,201243287 | 7,43E-08 | 0,001562433 |
| 204472_at      | NM_005261        | Hs.345139  | GTP binding protein overexpressed in skeletal muscle      | GEM      | EG2 | 5 | 0 | 12 | 0  | 0,03340802 0,201243287 | 7,43E-08 | 0,001562433 |
| 204595_s_at    | AI300520         | Hs.25590   | stanniocalcin 1                                           | STC1     | EG2 | 2 | 3 | 10 | 2  | 0,03340802 0,201243287 | 7,43E-08 | 0,001562433 |
| 205505_at      | NM_001490        | Hs.521568  | glucosaminyl (N-acetyl) transferase 1, core 2 (beta-1,6   | GCNT1    | EG2 | 1 | 4 | 6  | 6  | 0,03340802 0,201243287 | 7,43E-08 | 0,001562433 |
| 213112_s_at    | N30649           | Hs.529892  | sequestosome 1                                            | SQSTM1   | EG2 | 5 | 0 | 10 | 2  | 0,03340802 0,201243287 | 7,43E-08 | 0,001562433 |
| 213850_s_at    | AI984932         | Hs.210367  | splicing factor, arginine/serine-rich 2, interacting prot | SFRS2IP  | EG2 | 2 | 3 | 7  | 5  | 0,03340802 0,201243287 | 7,43E-08 | 0,001562433 |
| 226136_at      | N32834           |            |                                                           |          | EG2 | 5 | 0 | 7  | 5  | 0,03340802 0,201243287 | 7,43E-08 | 0,001562433 |
| 227354_at      | BF589359         | Hs.266175, | H phosphoprotein associated with glycosphingolipid mi     | PAG1     | EG2 | 3 | 2 | 7  | 5  | 0,03340802 0,201243287 | 7,43E-08 | 0,001562433 |
| 229374_at      | AI758962         | Hs.371218  | EPH receptor A4                                           | EPHA4    | EG2 | 4 | 1 | 3  | 9  | 0,03340802 0,201243287 | 7,43E-08 | 0,001562433 |
| 1558173_a_at   | AK093016         | Hs.257900, | H leucine zipper protein 1                                | LUZP1    | EG2 | 1 | 4 | 6  | 5  | 0,03340802 0,201243287 | 9,59E-07 | 0,001562433 |
| 201212_at      | D55696           | Hs.18069   | legumain                                                  | LGMN     | EG2 | 4 | 1 | 4  | 7  | 0,03340802 0,201243287 | 9,59E-07 | 0,001562433 |
| 202206_at      | AW450363         | Hs.111554  | ADP-ribosylation factor-like 7                            | ARL7     | EG2 | 2 | 3 | 7  | 4  | 0,03340802 0,201243287 | 9,59E-07 | 0,001562433 |
| 203387_s_at    | NM_014832        | Hs.210891  | TBC1 domain family, member 4                              | TBC1D4   | EG2 | 2 | 3 | 4  | 7  | 0,03340802 0,201243287 | 9,59E-07 | 0,001562433 |
| 204014_at      | NM_001394        | Hs.417962  | dual specificity phosphatase 4                            | DUSP4    | EG2 | 2 | 3 | 3  | 8  | 0,03340802 0,201243287 | 9,59E-07 | 0,001562433 |
| 205027_s_at    | NM_005204        | Hs.432453  | mitogen-activated protein kinase kinase kinase 8          | MAP3K8   | EG2 | 1 | 4 | 3  | 8  | 0,03340802 0,201243287 | 9,59E-07 | 0,001562433 |
| 206693_at      | NM_000880        | Hs.536926  | interleukin 7                                             | IL7      | EG2 | 0 | 5 | 7  | 4  | 0,03340802 0,201243287 | 9,59E-07 | 0,001562433 |
| 208893_s_at    | BC005047         | Hs.298654  | dual specificity phosphatase 6                            | DUSP6    | EG2 | 3 | 2 | 9  | 2  | 0,03340802 0,201243287 | 9,59E-07 | 0,001562433 |
| 210715_s_at    | AF027205         | Hs.31439   | serine peptidase inhibitor, Kunitz type, 2                | SPINT2   | EG2 | 3 | 2 | 3  | 8  | 0,03340802 0,201243287 | 9,59E-07 | 0,001562433 |
| 211668_s_at    | K03226           | Hs.77274   | plasminogen activator, urokinase                          | PLAU     | EG2 | 2 | 3 | 10 | 1  | 0,03340802 0,201243287 | 9,59E-07 | 0,001562433 |
| 212190_at      | AL541302         | Hs.38449   | serpin peptidase inhibitor, clade E (nexin, plasminoge    | SERPINE2 | EG2 | 2 | 3 | 7  | 4  | 0,03340802 0,201243287 | 9,59E-07 | 0,001562433 |
| 212444_at      | AA156240         |            |                                                           |          | EG2 | 3 | 2 | 4  | 7  | 0,03340802 0,201243287 | 9,59E-07 | 0,001562433 |
| 216598_s_at    | S69738           | Hs.303649  | chemokine (C-C motif) ligand 2                            | CCL2     | EG2 | 3 | 2 | 5  | 6  | 0,03340802 0,201243287 | 9,59E-07 | 0,001562433 |
| 218409_s_at    | NM_022365        | Hs.499000  | DnaJ (Hsp40) homolog, subfamily C, member 1               | DNAJC1   | EG2 | 0 | 5 | 9  | 2  | 0,03340802 0,201243287 | 9,59E-07 | 0,001562433 |
| 219352_at      | NM_017912        | Hs.529317  | hect domain and RLD 6                                     | HERC6    | EG2 | 0 | 5 | 1  | 10 | 0,03340802 0,201243287 | 9,59E-07 | 0,001562433 |

|             |           |           |                                                           |           |     |   |   |    |   |            |             |          |             |
|-------------|-----------|-----------|-----------------------------------------------------------|-----------|-----|---|---|----|---|------------|-------------|----------|-------------|
| 221757_at   | BE042976  | Hs.26670  |                                                           | MGC17330  | EG2 | 1 | 4 | 4  | 7 | 0,03340802 | 0,201243287 | 9,59E-07 | 0,001562433 |
| 221865_at   | BF969986  | Hs.522357 | chromosome 9 open reading frame 91                        | C9orf91   | EG2 | 2 | 3 | 4  | 7 | 0,03340802 | 0,201243287 | 9,59E-07 | 0,001562433 |
| 223195_s_at | BF131886  | Hs.469543 | sestrin 2                                                 | SESN2     | EG2 | 4 | 1 | 9  | 2 | 0,03340802 | 0,201243287 | 9,59E-07 | 0,001562433 |
| 223712_at   | AL136721  | Hs.527213 | 6-pyruvoyl-tetrahydropterin synthase/dimerization c       | PCBD2     | EG2 | 2 | 3 | 6  | 5 | 0,03340802 | 0,201243287 | 9,59E-07 | 0,001562433 |
| 226348_at   | AK026764  |           |                                                           |           | EG2 | 0 | 5 | 9  | 2 | 0,03340802 | 0,201243287 | 9,59E-07 | 0,001562433 |
| 228423_at   | AI887898  | Hs.549331 |                                                           | LOC389237 | EG2 | 5 | 0 | 4  | 7 | 0,03340802 | 0,201243287 | 9,59E-07 | 0,001562433 |
| 229071_at   | AI681419  | Hs.262480 |                                                           | LOC388327 | EG2 | 2 | 3 | 3  | 8 | 0,03340802 | 0,201243287 | 9,59E-07 | 0,001562433 |
| 229307_at   | N32051    | Hs.335239 | ankyrin repeat domain 28                                  | ANKRD28   | EG2 | 2 | 3 | 6  | 5 | 0,03340802 | 0,201243287 | 9,59E-07 | 0,001562433 |
| 230147_at   | AI378647  | Hs.42502  | coagulation factor II (thrombin) receptor-like 2          | F2RL2     | EG2 | 1 | 4 | 8  | 3 | 0,03340802 | 0,201243287 | 9,59E-07 | 0,001562433 |
| 230508_at   | AL569601  | Hs.292156 | dickkopf homolog 3 ( <i>Xenopus laevis</i> )              | DKK3      | EG2 | 2 | 3 | 6  | 5 | 0,03340802 | 0,201243287 | 9,59E-07 | 0,001562433 |
| 235266_at   | AI139629  | Hs.370834 | ATPase family, AAA domain containing 2                    | ATAD2     | EG2 | 2 | 3 | 3  | 8 | 0,03340802 | 0,201243287 | 9,59E-07 | 0,001562433 |
| 235836_at   | N51413    | Hs.250723 | H matrix-remodelling associated 7                         | MXRA7     | EG2 | 2 | 3 | 9  | 2 | 0,03340802 | 0,201243287 | 9,59E-07 | 0,001562433 |
| 236545_at   | AA532718  | Hs.435512 | protein phosphatase 3 (formerly 2B), catalytic subunit    | PPP3CA    | EG2 | 2 | 3 | 9  | 2 | 0,03340802 | 0,201243287 | 9,59E-07 | 0,001562433 |
| 236907_at   | AI760366  | Hs.387804 | poly(A) binding protein, cytoplasmic 1                    | PABPC1    | EG2 | 3 | 2 | 3  | 8 | 0,03340802 | 0,201243287 | 9,59E-07 | 0,001562433 |
| 239049_at   | BF514509  |           |                                                           |           | EG2 | 1 | 4 | 5  | 6 | 0,03340802 | 0,201243287 | 9,59E-07 | 0,001562433 |
| 242121_at   | AW973232  | Hs.122121 | ring finger protein 12                                    | RNF12     | EG2 | 2 | 3 | 5  | 6 | 0,03340802 | 0,201243287 | 9,59E-07 | 0,001562433 |
| 244341_at   | AA827728  | Hs.269528 | Mak3 homolog ( <i>S. cerevisiae</i> )                     | MAK3      | EG2 | 2 | 3 | 7  | 4 | 0,03340802 | 0,201243287 | 9,59E-07 | 0,001562433 |
| 244753_at   | BF000430  | Hs.270291 | actinin, alpha 4                                          | ACTN4     | EG2 | 3 | 2 | 10 | 1 | 0,03340802 | 0,201243287 | 9,59E-07 | 0,001562433 |
| 1568611_at  | CA418310  | Hs.519568 | procollagen-proline, 2-oxoglutarate 4-dioxygenase (p      | P4HA2     | EG2 | 0 | 5 | 6  | 4 | 0,03340802 | 0,201243287 | 9,97E-06 | 0,001562433 |
| 200906_s_at | AK025843  | Hs.151220 |                                                           | KIAA0992  | EG2 | 4 | 1 | 3  | 7 | 0,03340802 | 0,201243287 | 9,97E-06 | 0,001562433 |
| 202205_at   | NM_003370 | Hs.515469 | vasodilator-stimulated phosphoprotein                     | VASP      | EG2 | 4 | 1 | 4  | 6 | 0,03340802 | 0,201243287 | 9,97E-06 | 0,001562433 |
| 202350_s_at | NM_002380 | Hs.189445 | matrilin 2                                                | MATN2     | EG2 | 1 | 4 | 2  | 8 | 0,03340802 | 0,201243287 | 9,97E-06 | 0,001562433 |
| 202859_x_at | NM_000584 | Hs.624    | interleukin 8                                             | IL8       | EG2 | 3 | 2 | 9  | 1 | 0,03340802 | 0,201243287 | 9,97E-06 | 0,001562433 |
| 203397_s_at | BF063271  | Hs.170986 | UDP-N-acetyl-alpha-D-galactosamine:polypeptide N-         | GALNT3    | EG2 | 4 | 1 | 8  | 2 | 0,03340802 | 0,201243287 | 9,97E-06 | 0,001562433 |
| 203823_at   | NM_021106 | Hs.494875 | regulator of G-protein signalling 3                       | RGS3      | EG2 | 0 | 5 | 8  | 2 | 0,03340802 | 0,201243287 | 9,97E-06 | 0,001562433 |
| 204221_x_at | U16307    | Hs.553516 | GLI pathogenesis-related 1 (glioma)                       | GLIPR1    | EG2 | 5 | 0 | 6  | 4 | 0,03340802 | 0,201243287 | 9,97E-06 | 0,001562433 |
| 204326_x_at | NM_002450 | Hs.374950 | metallothionein 1X                                        | MT1X      | EG2 | 2 | 3 | 5  | 5 | 0,03340802 | 0,201243287 | 9,97E-06 | 0,001562433 |
| 204407_at   | AF080255  | Hs.486818 | transcription termination factor, RNA polymerase II       | TTF2      | EG2 | 3 | 2 | 1  | 9 | 0,03340802 | 0,201243287 | 9,97E-06 | 0,001562433 |
| 204597_x_at | NM_003155 | Hs.25590  | stanniocalcin 1                                           | STC1      | EG2 | 2 | 3 | 9  | 1 | 0,03340802 | 0,201243287 | 9,97E-06 | 0,001562433 |
| 204638_at   | NM_001611 | Hs.1211   | acid phosphatase 5, tartrate resistant                    | ACP5      | EG2 | 2 | 3 | 7  | 3 | 0,03340802 | 0,201243287 | 9,97E-06 | 0,001562433 |
| 205200_at   | NM_003278 | Hs.476092 | C-type lectin domain family 3, member B                   | CLEC3B    | EG2 | 0 | 5 | 3  | 7 | 0,03340802 | 0,201243287 | 9,97E-06 | 0,001562433 |
| 205559_s_at | NM_006200 | Hs.368542 | proprotein convertase subtilisin/kexin type 5             | PCSK5     | EG2 | 3 | 2 | 4  | 6 | 0,03340802 | 0,201243287 | 9,97E-06 | 0,001562433 |
| 206133_at   | NM_017523 | Hs.441975 |                                                           | BIRC4BP   | EG2 | 2 | 3 | 4  | 6 | 0,03340802 | 0,201243287 | 9,97E-06 | 0,001562433 |
| 206554_x_at | NM_006515 | Hs.475300 | SET domain and mariner transposase fusion gene            | SETMAR    | EG2 | 2 | 3 | 1  | 9 | 0,03340802 | 0,201243287 | 9,97E-06 | 0,001562433 |
| 206584_at   | NM_015364 | Hs.69328  | lymphocyte antigen 96                                     | LY96      | EG2 | 2 | 3 | 5  | 5 | 0,03340802 | 0,201243287 | 9,97E-06 | 0,001562433 |
| 206686_at   | NM_002610 | Hs.470633 | pyruvate dehydrogenase kinase, isoenzyme 1                | PDK1      | EG2 | 0 | 5 | 7  | 3 | 0,03340802 | 0,201243287 | 9,97E-06 | 0,001562433 |
| 206756_at   | NM_019886 | Hs.138155 | carbohydrate (N-acetylglucosamine 6-O) sulfotransfer      | CHST7     | EG2 | 0 | 5 | 9  | 1 | 0,03340802 | 0,201243287 | 9,97E-06 | 0,001562433 |
| 208527_x_at | NM_003523 | Hs.534369 | histone 1, H2be                                           | HIST1H2BE | EG2 | 3 | 2 | 2  | 8 | 0,03340802 | 0,201243287 | 9,97E-06 | 0,001562433 |
| 208961_s_at | AB017493  | Hs.4055   | Kruppel-like factor 6                                     | KLF6      | EG2 | 1 | 4 | 6  | 4 | 0,03340802 | 0,201243287 | 9,97E-06 | 0,001562433 |
| 209258_s_at | AI373676  | Hs.24485  | chondroitin sulfate proteoglycan 6 (bamacan)              | CSPG6     | EG2 | 1 | 4 | 6  | 4 | 0,03340802 | 0,201243287 | 9,97E-06 | 0,001562433 |
| 209276_s_at | AF162769  | Hs.28988  | glutaredoxin (thioltransferase)                           | GLRX      | EG2 | 1 | 4 | 8  | 2 | 0,03340802 | 0,201243287 | 9,97E-06 | 0,001562433 |
| 209822_s_at | L22431    | Hs.370422 | very low density lipoprotein receptor                     | VLDLR     | EG2 | 0 | 5 | 5  | 5 | 0,03340802 | 0,201243287 | 9,97E-06 | 0,001562433 |
| 212621_at   | AB006624  | Hs.533787 |                                                           | KIAA0286  | EG2 | 5 | 0 | 6  | 4 | 0,03340802 | 0,201243287 | 9,97E-06 | 0,001562433 |
| 214169_at   | BE615699  | Hs.438072 | unc-84 homolog A ( <i>C. elegans</i> )                    | UNC84A    | EG2 | 2 | 3 | 5  | 5 | 0,03340802 | 0,201243287 | 9,97E-06 | 0,001562433 |
| 215092_s_at | AJ005683  | Hs.371987 | nuclear factor of activated T-cells 5, tonicity-responsiv | NFAT5     | EG2 | 3 | 2 | 4  | 6 | 0,03340802 | 0,201243287 | 9,97E-06 | 0,001562433 |

|              |           |            |                                                        |           |     |   |   |    |    |            |             |          |             |
|--------------|-----------|------------|--------------------------------------------------------|-----------|-----|---|---|----|----|------------|-------------|----------|-------------|
| 218383_at    | NM_017815 | Hs.442782  | chromosome 14 open reading frame 94                    | C14orf94  | EG2 | 0 | 5 | 3  | 7  | 0,03340802 | 0,201243287 | 9,97E-06 | 0,001562433 |
| 219315_s_at  | NM_024600 | Hs.459652  | chromosome 16 open reading frame 30                    | C16orf30  | EG2 | 0 | 5 | 0  | 10 | 0,03340802 | 0,201243287 | 9,97E-06 | 0,001562433 |
| 219806_s_at  | NM_020179 | Hs.438064  |                                                        | FN5       | EG2 | 1 | 4 | 5  | 5  | 0,03340802 | 0,201243287 | 9,97E-06 | 0,001562433 |
| 219938_s_at  | NM_024430 | Hs.368623  | proline-serine-threonine phosphatase interacting pro   | PSTPIP2   | EG2 | 2 | 3 | 8  | 2  | 0,03340802 | 0,201243287 | 9,97E-06 | 0,001562433 |
| 221833_at    | AI971258  | Hs.295923  | seven in absentia homolog 1 (Drosophila)               | SIAH1     | EG2 | 0 | 5 | 2  | 8  | 0,03340802 | 0,201243287 | 9,97E-06 | 0,001562433 |
| 221986_s_at  | AW006750  | Hs.407709  | kelch-like 24 (Drosophila)                             | KLHL24    | EG2 | 5 | 0 | 4  | 6  | 0,03340802 | 0,201243287 | 9,97E-06 | 0,001562433 |
| 222736_s_at  | BC000049  | Hs.411925  | transmembrane protein 38B                              | TMEM38B   | EG2 | 5 | 0 | 8  | 2  | 0,03340802 | 0,201243287 | 9,97E-06 | 0,001562433 |
| 224496_s_at  | BC006292  | Hs.513933  |                                                        | MGC10744  | EG2 | 3 | 2 | 5  | 5  | 0,03340802 | 0,201243287 | 9,97E-06 | 0,001562433 |
| 224707_at    | AL522667  | Hs.483561  |                                                        | ORF1-FL49 | EG2 | 5 | 0 | 6  | 4  | 0,03340802 | 0,201243287 | 9,97E-06 | 0,001562433 |
| 225412_at    | AA761169  | Hs.469690  |                                                        | FLJ14681  | EG2 | 3 | 2 | 5  | 5  | 0,03340802 | 0,201243287 | 9,97E-06 | 0,001562433 |
| 225611_at    | AI922968  | Hs.133539  | microtubule associated serine/threonine kinase famil   | MAST4     | EG2 | 3 | 2 | 0  | 10 | 0,03340802 | 0,201243287 | 9,97E-06 | 0,001562433 |
| 225855_at    | AB046768  | Hs.369232  | erythrocyte membrane protein band 4.1 like 5           | EPB41L5   | EG2 | 4 | 1 | 3  | 7  | 0,03340802 | 0,201243287 | 9,97E-06 | 0,001562433 |
| 226051_at    | BF973568  | Hs.55940   |                                                        | SELM      | EG2 | 1 | 4 | 4  | 6  | 0,03340802 | 0,201243287 | 9,97E-06 | 0,001562433 |
| 226264_at    | AL137432  | Hs.494827  | sushi domain containing 1                              | SUSD1     | EG2 | 0 | 5 | 4  | 6  | 0,03340802 | 0,201243287 | 9,97E-06 | 0,001562433 |
| 227674_at    | AA910852  | Hs.390568  | zinc finger protein 585A                               | ZNF585A   | EG2 | 1 | 4 | 6  | 4  | 0,03340802 | 0,201243287 | 9,97E-06 | 0,001562433 |
| 227722_at    | AW043594  | Hs.527193  | ribosomal protein S23                                  | RPS23     | EG2 | 3 | 2 | 8  | 2  | 0,03340802 | 0,201243287 | 9,97E-06 | 0,001562433 |
| 227911_at    | AI935647  | Hs.183114  | Rho GTPase activating protein 28                       | ARHGAP28  | EG2 | 1 | 4 | 1  | 9  | 0,03340802 | 0,201243287 | 9,97E-06 | 0,001562433 |
| 228490_at    | AW292816  | Hs.549108  | abhydrolase domain containing 2                        | ABHD2     | EG2 | 3 | 2 | 10 | 0  | 0,03340802 | 0,201243287 | 9,97E-06 | 0,001562433 |
| 229963_at    | AV726956  | Hs.47209   | NGFRAP1-like 1                                         | NGFRAP1L1 | EG2 | 4 | 1 | 6  | 4  | 0,03340802 | 0,201243287 | 9,97E-06 | 0,001562433 |
| 230206_at    | AI692645  | Hs.195403  | dedicator of cytokinesis 5                             | DOCK5     | EG2 | 2 | 3 | 9  | 1  | 0,03340802 | 0,201243287 | 9,97E-06 | 0,001562433 |
| 230256_at    | AW009436  | Hs.131810  | chromosome 1 open reading frame 104                    | C1orf104  | EG2 | 0 | 5 | 6  | 4  | 0,03340802 | 0,201243287 | 9,97E-06 | 0,001562433 |
| 230292_at    | AA868809  | Hs.25447   | regulator of chromosome condensation (RCC1) and BT     | RCBTB2    | EG2 | 3 | 2 | 5  | 5  | 0,03340802 | 0,201243287 | 9,97E-06 | 0,001562433 |
| 231862_at    | AK023520  | Hs.349283  | chromobox homolog 5 (HP1 alpha homolog, Drosophil      | CBX5      | EG2 | 4 | 1 | 4  | 6  | 0,03340802 | 0,201243287 | 9,97E-06 | 0,001562433 |
| 233303_at    | AL110175  | Hs.472031, | H ubiquitin-conjugating enzyme E2D 3 (UBC4/5 homolog   | UBE2D3    | EG2 | 4 | 1 | 6  | 4  | 0,03340802 | 0,201243287 | 9,97E-06 | 0,001562433 |
| 235171_at    | AI354636  |            |                                                        |           | EG2 | 2 | 3 | 6  | 4  | 0,03340802 | 0,201243287 | 9,97E-06 | 0,001562433 |
| 235609_at    | BF056791  | Hs.532799  | BRCA1 interacting protein C-terminal helicase 1        | BRIP1     | EG2 | 4 | 1 | 3  | 7  | 0,03340802 | 0,201243287 | 9,97E-06 | 0,001562433 |
| 236524_at    | AA737437  | Hs.276876  | TM2 domain containing 1                                | TM2D1     | EG2 | 2 | 3 | 6  | 4  | 0,03340802 | 0,201243287 | 9,97E-06 | 0,001562433 |
| 237563_s_at  | AI286239  | Hs.181156  |                                                        | LOC440731 | EG2 | 2 | 3 | 3  | 7  | 0,03340802 | 0,201243287 | 9,97E-06 | 0,001562433 |
| 1554153_a_at | BC015714  | Hs.502458  | PHD finger protein 21A                                 | PHF21A    | EG2 | 3 | 2 | 6  | 3  | 0,03340802 | 0,201243287 | 8,42E-05 | 0,002977773 |
| 1555976_s_at | BU676221  | Hs.233936  |                                                        | LOC440476 | EG2 | 5 | 0 | 7  | 2  | 0,03340802 | 0,201243287 | 8,42E-05 | 0,002977773 |
| 1556346_at   | AJ227860  | Hs.289092  | coactosin-like 1 (Dictyostelium)                       | COTL1     | EG2 | 2 | 3 | 6  | 3  | 0,03340802 | 0,201243287 | 8,42E-05 | 0,002977773 |
| 1558290_a_at | BG200951  | Hs.133107  |                                                        | LOC441378 | EG2 | 0 | 5 | 4  | 5  | 0,03340802 | 0,201243287 | 8,42E-05 | 0,002977773 |
| 1559232_a_at | BC029450  | Hs.478031  | solute carrier family 33 (acetyl-CoA transporter), mem | SLC33A1   | EG2 | 4 | 1 | 9  | 0  | 0,03340802 | 0,201243287 | 8,42E-05 | 0,002977773 |
| 201171_at    | NM_003945 | Hs.484188  | ATPase, H+ transporting, lysosomal 9kDa, V0 subunit e  | ATP6V0E   | EG2 | 1 | 4 | 5  | 4  | 0,03340802 | 0,201243287 | 8,42E-05 | 0,002977773 |
| 201482_at    | NM_002826 | Hs.518374  | quiescin Q6                                            | QSCN6     | EG2 | 1 | 4 | 5  | 4  | 0,03340802 | 0,201243287 | 8,42E-05 | 0,002977773 |
| 201506_at    | NM_000358 | Hs.369397  | transforming growth factor, beta-induced, 68kDa        | TGFBI     | EG2 | 2 | 3 | 6  | 3  | 0,03340802 | 0,201243287 | 8,42E-05 | 0,002977773 |
| 201795_at    | NM_002296 | Hs.435166  | lamin B receptor                                       | LBR       | EG2 | 3 | 2 | 5  | 4  | 0,03340802 | 0,201243287 | 8,42E-05 | 0,002977773 |
| 202241_at    | NM_025195 | Hs.444947  | tribbles homolog 1 (Drosophila)                        | TRIB1     | EG2 | 1 | 4 | 8  | 1  | 0,03340802 | 0,201243287 | 8,42E-05 | 0,002977773 |
| 202263_at    | NM_016243 | Hs.334832  | cytochrome b5 reductase 1                              | CYB5R1    | EG2 | 1 | 4 | 6  | 3  | 0,03340802 | 0,201243287 | 8,42E-05 | 0,002977773 |
| 202419_at    | NM_002035 | Hs.74050   | follicular lymphoma variant translocation 1            | FVT1      | EG2 | 4 | 1 | 3  | 6  | 0,03340802 | 0,201243287 | 8,42E-05 | 0,002977773 |
| 202458_at    | NM_007173 | Hs.25338   | protease, serine, 23                                   | PRSS23    | EG2 | 1 | 4 | 9  | 0  | 0,03340802 | 0,201243287 | 8,42E-05 | 0,002977773 |
| 202478_at    | NM_021643 | Hs.467751  | tribbles homolog 2 (Drosophila)                        | TRIB2     | EG2 | 1 | 4 | 3  | 6  | 0,03340802 | 0,201243287 | 8,42E-05 | 0,002977773 |
| 203216_s_at  | NM_004999 | Hs.149387  | myosin VI                                              | MYO6      | EG2 | 5 | 0 | 5  | 4  | 0,03340802 | 0,201243287 | 8,42E-05 | 0,002977773 |
| 203231_s_at  | AW235612  | Hs.434961  | ataxin 1                                               | ATXN1     | EG2 | 2 | 3 | 3  | 6  | 0,03340802 | 0,201243287 | 8,42E-05 | 0,002977773 |
| 203414_at    | NM_012329 | Hs.463483  | monocyte to macrophage differentiation-associated      | MMD       | EG2 | 4 | 1 | 3  | 6  | 0,03340802 | 0,201243287 | 8,42E-05 | 0,002977773 |

|             |           |            |                                                         |          |     |   |   |   |   |            |             |          |             |
|-------------|-----------|------------|---------------------------------------------------------|----------|-----|---|---|---|---|------------|-------------|----------|-------------|
| 203865_s_at | NM_015833 | Hs.474018  | adenosine deaminase, RNA-specific, B1 (RED1 homolo      | ADARB1   | EG2 | 0 | 5 | 0 | 9 | 0,03340802 | 0,201243287 | 8,42E-05 | 0,002977773 |
| 203881_s_at | NM_004010 | Hs.495912  | dystrophin (muscular dystrophy, Duchenne and Becke      | DMD      | EG2 | 1 | 4 | 2 | 7 | 0,03340802 | 0,201243287 | 8,42E-05 | 0,002977773 |
| 204160_s_at | AW194947  | Hs.54037   | ectonucleotide pyrophosphatase/phosphodiesterase        | ENPP4    | EG2 | 4 | 1 | 8 | 1 | 0,03340802 | 0,201243287 | 8,42E-05 | 0,002977773 |
| 204396_s_at | NM_005308 | Hs.524625  | G protein-coupled receptor kinase 5                     | GRK5     | EG2 | 1 | 4 | 3 | 6 | 0,03340802 | 0,201243287 | 8,42E-05 | 0,002977773 |
| 204418_x_at | NM_000848 | Hs.279837  | glutathione S-transferase M2 (muscle)                   | GSTM2    | EG2 | 3 | 2 | 4 | 5 | 0,03340802 | 0,201243287 | 8,42E-05 | 0,002977773 |
| 204759_at   | NM_001268 | Hs.25447   | regulator of chromosome condensation (RCC1) and BT      | RCBTB2   | EG2 | 3 | 2 | 6 | 3 | 0,03340802 | 0,201243287 | 8,42E-05 | 0,002977773 |
| 204774_at   | NM_014210 | Hs.553491  | ecotropic viral integration site 2A                     | EVI2A    | EG2 | 4 | 1 | 6 | 3 | 0,03340802 | 0,201243287 | 8,42E-05 | 0,002977773 |
| 204971_at   | NM_005213 | Hs.518198  | cystatin A (stefin A)                                   | CSTA     | EG2 | 2 | 3 | 9 | 0 | 0,03340802 | 0,201243287 | 8,42E-05 | 0,002977773 |
| 206307_s_at | NM_004472 | Hs.519385  | forkhead box D1                                         | FOXD1    | EG2 | 2 | 3 | 8 | 1 | 0,03340802 | 0,201243287 | 8,42E-05 | 0,002977773 |
| 207992_s_at | NM_000480 | Hs.501890  | adenosine monophosphate deaminase (isoform E)           | AMPD3    | EG2 | 2 | 3 | 0 | 9 | 0,03340802 | 0,201243287 | 8,42E-05 | 0,002977773 |
| 208025_s_at | NM_003483 | Hs.505924  | high mobility group AT-hook 2                           | HMGA2    | EG2 | 3 | 2 | 6 | 3 | 0,03340802 | 0,201243287 | 8,42E-05 | 0,002977773 |
| 208579_x_at | NM_017445 | Hs.473961  | H2B histone family, member S                            | H2BFS    | EG2 | 3 | 2 | 1 | 8 | 0,03340802 | 0,201243287 | 8,42E-05 | 0,002977773 |
| 209447_at   | AF043290  | Hs.12967   | spectrin repeat containing, nuclear envelope 1          | SYNE1    | EG2 | 2 | 3 | 9 | 0 | 0,03340802 | 0,201243287 | 8,42E-05 | 0,002977773 |
| 211000_s_at | AB015706  | Hs.454699, | interleukin 6 signal transducer (gp130, oncostatin M re | IL6ST    | EG2 | 4 | 1 | 1 | 8 | 0,03340802 | 0,201243287 | 8,42E-05 | 0,002977773 |
| 211571_s_at | D32039    | Hs.443681  | chondroitin sulfate proteoglycan 2 (versican)           | CSPG2    | EG2 | 4 | 1 | 6 | 3 | 0,03340802 | 0,201243287 | 8,42E-05 | 0,002977773 |
| 212224_at   | NM_000689 | Hs.76392   | aldehyde dehydrogenase 1 family, member A1              | ALDH1A1  | EG2 | 3 | 2 | 2 | 7 | 0,03340802 | 0,201243287 | 8,42E-05 | 0,002977773 |
| 212442_s_at | BG289001  | Hs.506829  | LAG1 longevity assurance homolog 6 (S. cerevisiae)      | LASS6    | EG2 | 4 | 1 | 3 | 6 | 0,03340802 | 0,201243287 | 8,42E-05 | 0,002977773 |
| 212828_at   | AA191573  | Hs.434494  | synaptojanin 2                                          | SYNJ2    | EG2 | 3 | 2 | 2 | 7 | 0,03340802 | 0,201243287 | 8,42E-05 | 0,002977773 |
| 212989_at   | AI377497  | Hs.386215  | transmembrane protein 23                                | TMEM23   | EG2 | 4 | 1 | 1 | 8 | 0,03340802 | 0,201243287 | 8,42E-05 | 0,002977773 |
| 213029_at   | BG478428  | Hs.370359  | nuclear factor I/B                                      | NFIB     | EG2 | 3 | 2 | 4 | 5 | 0,03340802 | 0,201243287 | 8,42E-05 | 0,002977773 |
| 213286_at   | BF445199  | Hs.435231  | zinc finger RNA binding protein                         | ZFR      | EG2 | 4 | 1 | 6 | 3 | 0,03340802 | 0,201243287 | 8,42E-05 | 0,002977773 |
| 213328_at   | AI936517  | Hs.481181  | NIMA (never in mitosis gene a)-related kinase 1         | NEK1     | EG2 | 1 | 4 | 5 | 4 | 0,03340802 | 0,201243287 | 8,42E-05 | 0,002977773 |
| 214305_s_at | AW003030  | Hs.471011  | splicing factor 3b, subunit 1, 155kDa                   | SF3B1    | EG2 | 2 | 3 | 6 | 3 | 0,03340802 | 0,201243287 | 8,42E-05 | 0,002977773 |
| 214375_at   | AI962377  | Hs.172445  | PTPRF interacting protein, binding protein 1 (liprin be | PPFIBP1  | EG2 | 1 | 4 | 6 | 3 | 0,03340802 | 0,201243287 | 8,42E-05 | 0,002977773 |
| 216250_s_at | X77598    | Hs.125474  | leupaxin                                                | LPXN     | EG2 | 2 | 3 | 7 | 2 | 0,03340802 | 0,201243287 | 8,42E-05 | 0,002977773 |
| 218128_at   | AU151875  | Hs.84928   | nuclear transcription factor Y, beta                    | NFYB     | EG2 | 1 | 4 | 2 | 7 | 0,03340802 | 0,201243287 | 8,42E-05 | 0,002977773 |
| 218170_at   | NM_016048 | Hs.483296  | isochorismatase domain containing 1                     | ISOC1    | EG2 | 3 | 2 | 4 | 5 | 0,03340802 | 0,201243287 | 8,42E-05 | 0,002977773 |
| 218522_s_at | NM_018174 | Hs.66048   | BPY2 interacting protein 1                              | BPY2IP1  | EG2 | 0 | 5 | 3 | 6 | 0,03340802 | 0,201243287 | 8,42E-05 | 0,002977773 |
| 218694_at   | NM_016608 | Hs.9728    | armadillo repeat containing, X-linked 1                 | ARMCX1   | EG2 | 3 | 2 | 4 | 5 | 0,03340802 | 0,201243287 | 8,42E-05 | 0,002977773 |
| 218772_x_at | NM_018112 | Hs.411925  | transmembrane protein 38B                               | TMEM38B  | EG2 | 5 | 0 | 7 | 2 | 0,03340802 | 0,201243287 | 8,42E-05 | 0,002977773 |
| 219014_at   | NM_016619 | Hs.546392  | placenta-specific 8                                     | PLAC8    | EG2 | 1 | 4 | 3 | 6 | 0,03340802 | 0,201243287 | 8,42E-05 | 0,002977773 |
| 219104_at   | NM_016422 | Hs.44685   | ring finger protein 141                                 | RNF141   | EG2 | 2 | 3 | 1 | 8 | 0,03340802 | 0,201243287 | 8,42E-05 | 0,002977773 |
| 219131_at   | NM_013319 | Hs.522933  | UbiA prenyltransferase domain containing 1              | UBIAD1   | EG2 | 2 | 3 | 8 | 1 | 0,03340802 | 0,201243287 | 8,42E-05 | 0,002977773 |
| 219132_at   | NM_021255 | Hs.105103  | pellino homolog 2 (Drosophila)                          | PELI2    | EG2 | 4 | 1 | 4 | 5 | 0,03340802 | 0,201243287 | 8,42E-05 | 0,002977773 |
| 219308_s_at | NM_012093 | Hs.18268   | adenylate kinase 5                                      | AK5      | EG2 | 4 | 1 | 6 | 3 | 0,03340802 | 0,201243287 | 8,42E-05 | 0,002977773 |
| 221593_s_at | BC001663  | Hs.469473, | ribosomal protein L31                                   | RPL31    | EG2 | 4 | 1 | 7 | 2 | 0,03340802 | 0,201243287 | 8,42E-05 | 0,002977773 |
| 221756_at   | AL540260  | Hs.26670   |                                                         | MGC17330 | EG2 | 0 | 5 | 3 | 6 | 0,03340802 | 0,201243287 | 8,42E-05 | 0,002977773 |
| 222587_s_at | BF699855  | Hs.127407  | UDP-N-acetyl-alpha-D-galactosamine:polypeptide N-       | GALNT7   | EG2 | 2 | 3 | 4 | 5 | 0,03340802 | 0,201243287 | 8,42E-05 | 0,002977773 |
| 223339_at   | BC001867  | Hs.241336  | ATPase inhibitory factor 1                              | ATPIF1   | EG2 | 4 | 1 | 5 | 4 | 0,03340802 | 0,201243287 | 8,42E-05 | 0,002977773 |
| 223622_s_at | AF284751  | Hs.473855  | hydroxypyruvate isomerase homolog (E. coli)             | HYI      | EG2 | 1 | 4 | 3 | 6 | 0,03340802 | 0,201243287 | 8,42E-05 | 0,002977773 |
| 223672_at   | AL136561  | Hs.132121  | SH3-domain GRB2-like (endophilin) interacting protei    | SGIP1    | EG2 | 4 | 1 | 5 | 4 | 0,03340802 | 0,201243287 | 8,42E-05 | 0,002977773 |
| 223769_x_at | AF284750  | Hs.473855  | hydroxypyruvate isomerase homolog (E. coli)             | HYI      | EG2 | 3 | 2 | 3 | 6 | 0,03340802 | 0,201243287 | 8,42E-05 | 0,002977773 |
| 224944_at   | AL566034  | Hs.11355   | thymopoietin                                            | TMPO     | EG2 | 4 | 1 | 4 | 5 | 0,03340802 | 0,201243287 | 8,42E-05 | 0,002977773 |
| 225330_at   | AL044092  | Hs.20573   | insulin-like growth factor 1 receptor                   | IGF1R    | EG2 | 3 | 2 | 1 | 8 | 0,03340802 | 0,201243287 | 8,42E-05 | 0,002977773 |
| 225592_at   | D81048    | Hs.519993  | nurim (nuclear envelope membrane protein)               | NRM      | EG2 | 2 | 3 | 5 | 4 | 0,03340802 | 0,201243287 | 8,42E-05 | 0,002977773 |

|              |           |            |                                                          |               |     |   |   |    |    |                        |             |          |             |
|--------------|-----------|------------|----------------------------------------------------------|---------------|-----|---|---|----|----|------------------------|-------------|----------|-------------|
| 225816_at    | AW138134  | Hs.12420   | PHD finger protein 17                                    | PHF17         | EG2 | 3 | 2 | 4  | 5  | 0,03340802             | 0,201243287 | 8,42E-05 | 0,002977773 |
| 226021_at    | AW150720  | Hs.244940  | retinol dehydrogenase 10 (all-trans)                     | RDH10         | EG2 | 3 | 2 | 4  | 5  | 0,03340802             | 0,201243287 | 8,42E-05 | 0,002977773 |
| 226037_s_at  | AL049589  | Hs.171723, | H TAF9-like RNA polymerase II, TATA box binding protei   | TAF9L         | EG2 | 5 | 0 | 3  | 6  | 0,03340802             | 0,201243287 | 8,42E-05 | 0,002977773 |
| 226272_at    | N25986    |            |                                                          |               | EG2 | 3 | 2 | 1  | 8  | 0,03340802             | 0,201243287 | 8,42E-05 | 0,002977773 |
| 226384_at    | BE858787  | Hs.437179  | phosphatidic acid phosphatase type 2 domain containi     | PPAPDC1B      | EG2 | 4 | 1 | 7  | 2  | 0,03340802             | 0,201243287 | 8,42E-05 | 0,002977773 |
| 226550_at    | AI672159  |            |                                                          |               | EG2 | 4 | 1 | 4  | 5  | 0,03340802             | 0,201243287 | 8,42E-05 | 0,002977773 |
| 227114_at    | BG435876  | Hs.380110  |                                                          | DKFZp547C195  | EG2 | 0 | 5 | 5  | 4  | 0,03340802             | 0,201243287 | 8,42E-05 | 0,002977773 |
| 227607_at    | AI638611  | Hs.16229   |                                                          | AMSH-LP       | EG2 | 2 | 3 | 3  | 6  | 0,03340802             | 0,201243287 | 8,42E-05 | 0,002977773 |
| 228333_at    | AI912571  |            |                                                          |               | EG2 | 3 | 2 | 6  | 3  | 0,03340802             | 0,201243287 | 8,42E-05 | 0,002977773 |
| 228955_at    | AL041761  |            |                                                          |               | EG2 | 4 | 1 | 4  | 5  | 0,03340802             | 0,201243287 | 8,42E-05 | 0,002977773 |
| 229359_at    | BE552208  |            |                                                          |               | EG2 | 3 | 2 | 6  | 3  | 0,03340802             | 0,201243287 | 8,42E-05 | 0,002977773 |
| 229491_at    | BF433180  | Hs.546482  |                                                          | LOC133308     | EG2 | 3 | 2 | 7  | 2  | 0,03340802             | 0,201243287 | 8,42E-05 | 0,002977773 |
| 229538_s_at  | AW271106  | Hs.133294  | IQ motif containing GTPase activating protein 3          | IQGAP3        | EG2 | 3 | 2 | 3  | 6  | 0,03340802             | 0,201243287 | 8,42E-05 | 0,002977773 |
| 229692_at    | AW135003  | Hs.435771  | apoptosis inhibitor 5                                    | API5          | EG2 | 4 | 1 | 8  | 1  | 0,03340802             | 0,201243287 | 8,42E-05 | 0,002977773 |
| 229850_at    | N30152    |            |                                                          |               | EG2 | 5 | 0 | 3  | 6  | 0,03340802             | 0,201243287 | 8,42E-05 | 0,002977773 |
| 229865_at    | AW058617  | Hs.159430  | fibronectin type III domain containing 3B                | FNDC3B        | EG2 | 4 | 1 | 5  | 4  | 0,03340802             | 0,201243287 | 8,42E-05 | 0,002977773 |
| 230345_at    | AI654547  |            |                                                          |               | EG2 | 1 | 4 | 6  | 3  | 0,03340802             | 0,201243287 | 8,42E-05 | 0,002977773 |
| 231929_at    | AI458439  |            |                                                          |               | EG2 | 3 | 2 | 4  | 5  | 0,03340802             | 0,201243287 | 8,42E-05 | 0,002977773 |
| 232164_s_at  | AL137725  | Hs.200412  | epiplakin 1                                              | EPPK1         | EG2 | 3 | 2 | 1  | 8  | 0,03340802             | 0,201243287 | 8,42E-05 | 0,002977773 |
| 232889_at    | AU147591  |            |                                                          | LOC389281     | EG2 | 1 | 4 | 4  | 5  | 0,03340802             | 0,201243287 | 8,42E-05 | 0,002977773 |
| 233543_s_at  | AK021582  | Hs.334772  |                                                          | FLJ13614      | EG2 | 3 | 2 | 5  | 4  | 0,03340802             | 0,201243287 | 8,42E-05 | 0,002977773 |
| 235046_at    | AA456099  |            |                                                          |               | EG2 | 5 | 0 | 1  | 8  | 0,03340802             | 0,201243287 | 8,42E-05 | 0,002977773 |
| 235276_at    | AA781795  | Hs.546467  | epithelial stromal interaction 1 (breast)                | EPSTI1        | EG2 | 0 | 5 | 3  | 6  | 0,03340802             | 0,201243287 | 8,42E-05 | 0,002977773 |
| 235309_at    | AA126311  |            |                                                          |               | EG2 | 3 | 2 | 6  | 3  | 0,03340802             | 0,201243287 | 8,42E-05 | 0,002977773 |
| 235653_s_at  | BF685315  | Hs.479971  | THAP domain containing 6                                 | THAP6         | EG2 | 0 | 5 | 4  | 5  | 0,03340802             | 0,201243287 | 8,42E-05 | 0,002977773 |
| 236449_at    | AI885390  | Hs.695     | cystatin B (stefin B)                                    | CSTB          | EG2 | 2 | 3 | 5  | 4  | 0,03340802             | 0,201243287 | 8,42E-05 | 0,002977773 |
| 237459_at    | AA811257  | Hs.506415  | PCTAIRE protein kinase 2                                 | PCTK2         | EG2 | 1 | 4 | 9  | 0  | 0,03340802             | 0,201243287 | 8,42E-05 | 0,002977773 |
| 238320_at    | AV659198  | Hs.523789  |                                                          | TncRNA        | EG2 | 2 | 3 | 5  | 4  | 0,03340802             | 0,201243287 | 8,42E-05 | 0,002977773 |
| 238462_at    | AI418293  | Hs.444075  |                                                          | STS-1         | EG2 | 4 | 1 | 3  | 6  | 0,03340802             | 0,201243287 | 8,42E-05 | 0,002977773 |
| 238673_at    | AV724325  |            |                                                          |               | EG2 | 4 | 1 | 1  | 8  | 0,03340802             | 0,201243287 | 8,42E-05 | 0,002977773 |
| 239147_at    | AI243677  | Hs.163914  |                                                          | DKFZp313G1735 | EG2 | 1 | 4 | 5  | 4  | 0,03340802             | 0,201243287 | 8,42E-05 | 0,002977773 |
| 239331_at    | AW954199  |            |                                                          |               | EG2 | 3 | 2 | 5  | 4  | 0,03340802             | 0,201243287 | 8,42E-05 | 0,002977773 |
| 241017_at    | AA779927  | Hs.469473, | H ribosomal protein L31                                  | RPL31         | EG2 | 3 | 2 | 2  | 7  | 0,03340802             | 0,201243287 | 8,42E-05 | 0,002977773 |
| 241359_at    | AA729232  |            |                                                          |               | EG2 | 1 | 4 | 2  | 7  | 0,03340802             | 0,201243287 | 8,42E-05 | 0,002977773 |
| 241838_at    | AA699443  |            |                                                          |               | EG2 | 3 | 2 | 1  | 8  | 0,03340802             | 0,201243287 | 8,42E-05 | 0,002977773 |
| 242201_at    | AI418253  | Hs.397073  | postmeiotic segregation increased 2-like 5               | PMS2L5        | EG2 | 1 | 4 | 7  | 2  | 0,03340802             | 0,201243287 | 8,42E-05 | 0,002977773 |
| 242429_at    | BF435183  | Hs.412517  | zinc finger protein 567                                  | ZNF567        | EG2 | 0 | 5 | 5  | 4  | 0,03340802             | 0,201243287 | 8,42E-05 | 0,002977773 |
| 242750_at    | AA678047  | Hs.117747  | methylmalonic aciduria (cobalamin deficiency) cblA ty    | MMAA          | EG2 | 4 | 1 | 7  | 2  | 0,03340802             | 0,201243287 | 8,42E-05 | 0,002977773 |
| 242856_at    | AI291804  |            |                                                          |               | EG2 | 2 | 3 | 5  | 4  | 0,03340802             | 0,201243287 | 8,42E-05 | 0,002977773 |
| 244025_at    | BF590917  |            |                                                          |               | EG2 | 4 | 1 | 8  | 1  | 0,03340802             | 0,201243287 | 8,42E-05 | 0,002977773 |
| 91703_at     | AA149545  | Hs.502867  | EH domain binding protein 1-like 1                       | EHBP1L1       | EG2 | 1 | 4 | 5  | 4  | 0,03340802             | 0,201243287 | 8,42E-05 | 0,002977773 |
| 200742_s_at  | BG231932  | Hs.523454  | tripeptidyl peptidase I                                  | TPP1          | EG2 | 0 | 4 | 11 | 3  | 0,1119520740,440114659 |             | 2,17E-10 | 0,001562433 |
| 221539_at    | AB044548  | Hs.411641  | eukaryotic translation initiation factor 4E binding prot | EIF4EBP1      | EG2 | 0 | 4 | 8  | 6  | 0,1119520740,440114659 |             | 2,17E-10 | 0,001562433 |
| 221911_at    | BE881590  | Hs.22634   | ets variant gene 1                                       | ETV1          | EG2 | 2 | 2 | 9  | 5  | 0,1119520740,440114659 |             | 2,17E-10 | 0,001562433 |
| 1553613_s_at | NM_001453 | Hs.348883  | forkhead box C1                                          | FOXC1         | EG2 | 1 | 3 | 3  | 10 | 0,1119520740,440114659 |             | 4,56E-09 | 0,001562433 |

|              |           |           |                                                        |              |     |   |   |    |    |                        |          |             |
|--------------|-----------|-----------|--------------------------------------------------------|--------------|-----|---|---|----|----|------------------------|----------|-------------|
| 202679_at    | NM_000271 | Hs.464779 | Niemann-Pick disease, type C1                          | NPC1         | EG2 | 1 | 3 | 12 | 1  | 0,1119520740,440114659 | 4,56E-09 | 0,001562433 |
| 204070_at    | NM_004585 | Hs.17466  | retinoic acid receptor responder (tazarotene induced)  | RARRES3      | EG2 | 2 | 2 | 4  | 9  | 0,1119520740,440114659 | 4,56E-09 | 0,001562433 |
| 209459_s_at  | AF237813  | Hs.336768 | 4-aminobutyrate aminotransferase                       | ABAT         | EG2 | 2 | 2 | 6  | 7  | 0,1119520740,440114659 | 4,56E-09 | 0,001562433 |
| 213067_at    | AI382123  | Hs.16355  | myosin, heavy polypeptide 10, non-muscle               | MYH10        | EG2 | 1 | 3 | 2  | 11 | 0,1119520740,440114659 | 4,56E-09 | 0,001562433 |
| 224851_at    | AW274756  | Hs.119882 | cyclin-dependent kinase 6                              | CDK6         | EG2 | 2 | 2 | 5  | 8  | 0,1119520740,440114659 | 4,56E-09 | 0,001562433 |
| 226757_at    | AA131041  | Hs.437609 | interferon-induced protein with tetratricopeptide rep  | IFIT2        | EG2 | 2 | 2 | 8  | 5  | 0,1119520740,440114659 | 4,56E-09 | 0,001562433 |
| 242560_at    | AA579890  | Hs.208388 | Fanconi anemia, complementation group D2               | FANCD2       | EG2 | 3 | 1 | 3  | 10 | 0,1119520740,440114659 | 4,56E-09 | 0,001562433 |
| 203386_at    | AI650848  | Hs.210891 | TBC1 domain family, member 4                           | TBC1D4       | EG2 | 2 | 2 | 5  | 7  | 0,1119520740,440114659 | 7,43E-08 | 0,001562433 |
| 207057_at    | NM_004731 | Hs.439643 | solute carrier family 16 (monocarboxylic acid transpor | SLC16A7      | EG2 | 2 | 2 | 3  | 9  | 0,1119520740,440114659 | 7,43E-08 | 0,001562433 |
| 209160_at    | AB018580  | Hs.78183  | aldo-keto reductase family 1, member C3 (3-alpha hyd   | AKR1C3       | EG2 | 1 | 3 | 6  | 6  | 0,1119520740,440114659 | 7,43E-08 | 0,001562433 |
| 217998_at    | NM_007350 | Hs.484885 | pleckstrin homology-like domain, family A, member 1    | PHLDA1       | EG2 | 2 | 2 | 10 | 2  | 0,1119520740,440114659 | 7,43E-08 | 0,001562433 |
| 217999_s_at  | NM_007350 | Hs.484885 | pleckstrin homology-like domain, family A, member 1    | PHLDA1       | EG2 | 3 | 1 | 10 | 2  | 0,1119520740,440114659 | 7,43E-08 | 0,001562433 |
| 1554016_a_at | BC006291  | Hs.408702 |                                                        | FLJ13154     | EG2 | 0 | 4 | 7  | 4  | 0,1119520740,440114659 | 9,59E-07 | 0,001562433 |
| 200879_s_at  | NM_001430 | Hs.468410 | endothelial PAS domain protein 1                       | EPAS1        | EG2 | 4 | 0 | 8  | 3  | 0,1119520740,440114659 | 9,59E-07 | 0,001562433 |
| 201107_s_at  | AI812030  | Hs.164226 | thrombospondin 1                                       | THBS1        | EG2 | 2 | 2 | 5  | 6  | 0,1119520740,440114659 | 9,59E-07 | 0,001562433 |
| 201580_s_at  | AL544094  | Hs.169358 | thioredoxin domain containing 13                       | TXNDC13      | EG2 | 0 | 4 | 7  | 4  | 0,1119520740,440114659 | 9,59E-07 | 0,001562433 |
| 201858_s_at  | J03223    | Hs.1908   | proteoglycan 1, secretory granule                      | PRG1         | EG2 | 3 | 1 | 6  | 5  | 0,1119520740,440114659 | 9,59E-07 | 0,001562433 |
| 202669_s_at  | U16797    | Hs.149239 | ephrin-B2                                              | EFNB2        | EG2 | 2 | 2 | 0  | 11 | 0,1119520740,440114659 | 9,59E-07 | 0,001562433 |
| 202838_at    | NM_000147 | Hs.370858 | fucosidase, alpha-L- 1, tissue                         | FUCA1        | EG2 | 1 | 3 | 9  | 2  | 0,1119520740,440114659 | 9,59E-07 | 0,001562433 |
| 204224_s_at  | NM_000161 | Hs.86724  | GTP cyclohydrolase 1 (dopa-responsive dystonia)        | GCH1         | EG2 | 2 | 2 | 7  | 4  | 0,1119520740,440114659 | 9,59E-07 | 0,001562433 |
| 204338_s_at  | NM_005613 | Hs.386726 | regulator of G-protein signalling 4                    | RGS4         | EG2 | 3 | 1 | 9  | 2  | 0,1119520740,440114659 | 9,59E-07 | 0,001562433 |
| 205047_s_at  | NM_001673 | Hs.489207 | asparagine synthetase                                  | ASNS         | EG2 | 4 | 0 | 5  | 6  | 0,1119520740,440114659 | 9,59E-07 | 0,001562433 |
| 206237_s_at  | NM_013957 | Hs.453951 | neuregulin 1                                           | NRG1         | EG2 | 2 | 2 | 9  | 2  | 0,1119520740,440114659 | 9,59E-07 | 0,001562433 |
| 212979_s_at  | AW293343  | Hs.406492 |                                                        | KIAA0738     | EG2 | 2 | 2 | 4  | 7  | 0,1119520740,440114659 | 9,59E-07 | 0,001562433 |
| 215813_s_at  | S36219    | Hs.201978 | prostaglandin-endoperoxide synthase 1 (prostaglandi    | PTGS1        | EG2 | 1 | 3 | 6  | 5  | 0,1119520740,440114659 | 9,59E-07 | 0,001562433 |
| 218590_at    | NM_021830 | Hs.22678  | progressive external ophthalmoplegia 1                 | PEO1         | EG2 | 1 | 3 | 4  | 7  | 0,1119520740,440114659 | 9,59E-07 | 0,001562433 |
| 219326_s_at  | NM_006577 | Hs.173203 | UDP-GlcNAc:betaGal beta-1,3-N-acetylglucosaminyltr     | B3GNT1       | EG2 | 4 | 0 | 6  | 5  | 0,1119520740,440114659 | 9,59E-07 | 0,001562433 |
| 219675_s_at  | NM_025076 | Hs.469561 | UDP-glucuronate decarboxylase 1                        | UXS1         | EG2 | 2 | 2 | 4  | 7  | 0,1119520740,440114659 | 9,59E-07 | 0,001562433 |
| 221864_at    | AW517464  | Hs.460617 |                                                        | MGC13024     | EG2 | 0 | 4 | 6  | 5  | 0,1119520740,440114659 | 9,59E-07 | 0,001562433 |
| 222572_at    | BG542521  | Hs.22265  | protein phosphatase 2C, magnesium-dependent, cata      | PPM2C        | EG2 | 4 | 0 | 4  | 7  | 0,1119520740,440114659 | 9,59E-07 | 0,001562433 |
| 223217_s_at  | BE646573  | Hs.319171 | nuclear factor of kappa light polypeptide gene enhanc  | NFKBIZ       | EG2 | 0 | 4 | 4  | 7  | 0,1119520740,440114659 | 9,59E-07 | 0,001562433 |
| 224480_s_at  | BC006236  | Hs.99196  |                                                        | MGC11324     | EG2 | 3 | 1 | 5  | 6  | 0,1119520740,440114659 | 9,59E-07 | 0,001562433 |
| 225798_at    | AL047908  | Hs.368944 |                                                        | JAZF1        | EG2 | 1 | 3 | 6  | 5  | 0,1119520740,440114659 | 9,59E-07 | 0,001562433 |
| 225929_s_at  | AA233374  | Hs.195642 | chromosome 17 open reading frame 27                    | C17orf27     | EG2 | 0 | 4 | 4  | 7  | 0,1119520740,440114659 | 9,59E-07 | 0,001562433 |
| 226460_at    | AB040883  | Hs.556658 |                                                        | KIAA1450     | EG2 | 2 | 2 | 6  | 5  | 0,1119520740,440114659 | 9,59E-07 | 0,001562433 |
| 228244_at    | BF062383  | Hs.103902 | biogenesis of lysosome-related organelles complex-1    | BLOC1S3      | EG2 | 0 | 4 | 7  | 4  | 0,1119520740,440114659 | 9,59E-07 | 0,001562433 |
| 228416_at    | AI149508  | Hs.470174 | origin recognition complex, subunit 4-like (yeast)     | ORC4L        | EG2 | 2 | 2 | 7  | 4  | 0,1119520740,440114659 | 9,59E-07 | 0,001562433 |
| 228461_at    | AL566989  | Hs.535157 |                                                        | LOC442040    | EG2 | 3 | 1 | 0  | 11 | 0,1119520740,440114659 | 9,59E-07 | 0,001562433 |
| 228574_at    | AI862551  | Hs.444240 |                                                        | DKFZp762A217 | EG2 | 1 | 3 | 0  | 11 | 0,1119520740,440114659 | 9,59E-07 | 0,001562433 |
| 230109_at    | AI638433  | Hs.126980 | phosphodiesterase 7B                                   | PDE7B        | EG2 | 2 | 2 | 2  | 9  | 0,1119520740,440114659 | 9,59E-07 | 0,001562433 |
| 232031_s_at  | AK023817  | Hs.514843 | KIAA1632                                               | KIAA1632     | EG2 | 3 | 1 | 11 | 0  | 0,1119520740,440114659 | 9,59E-07 | 0,001562433 |
| 235405_at    | N79662    | Hs.485557 | glutathione S-transferase A4                           | GSTA4        | EG2 | 3 | 1 | 5  | 6  | 0,1119520740,440114659 | 9,59E-07 | 0,001562433 |
| 235542_at    | BF675754  | Hs.516107 |                                                        | MGC22014     | EG2 | 2 | 2 | 3  | 8  | 0,1119520740,440114659 | 9,59E-07 | 0,001562433 |
| 236356_at    | AI808395  | Hs.471207 | NADH dehydrogenase (ubiquinone) Fe-S protein 1, 75     | NDUFS1       | EG2 | 2 | 2 | 6  | 5  | 0,1119520740,440114659 | 9,59E-07 | 0,001562433 |
| 238940_at    | BE328128  | Hs.373857 | Kruppel-like factor 12                                 | KLF12        | EG2 | 4 | 0 | 4  | 7  | 0,1119520740,440114659 | 9,59E-07 | 0,001562433 |

|             |           |                     |                                                            |          |     |   |   |    |    |                        |          |             |
|-------------|-----------|---------------------|------------------------------------------------------------|----------|-----|---|---|----|----|------------------------|----------|-------------|
| 240383_at   | AI239832  | Hs.472031,          | Ubiquitin-conjugating enzyme E2D 3 (UBC4/5 homolog)        | UBE2D3   | EG2 | 2 | 2 | 6  | 5  | 0,1119520740,440114659 | 9,59E-07 | 0,001562433 |
| 242767_at   | N95437    | Hs.475353           | LIM and cysteine-rich domains 1                            | LMCD1    | EG2 | 2 | 2 | 5  | 6  | 0,1119520740,440114659 | 9,59E-07 | 0,001562433 |
| 244546_at   | AI760495  | Hs.437060           | cytochrome c, somatic                                      | CYCS     | EG2 | 1 | 3 | 7  | 4  | 0,1119520740,440114659 | 9,59E-07 | 0,001562433 |
| 1557852_at  | AW418842  | Hs.524271           | polyhomeotic-like 2 (Drosophila)                           | PHC2     | EG2 | 1 | 3 | 8  | 2  | 0,1119520740,440114659 | 9,97E-06 | 0,001562433 |
| 1559332_at  | BC016339  | Hs.332847           | cysteine rich transmembrane BMP regulator 1 (chordi        | CRIM1    | EG2 | 1 | 3 | 8  | 2  | 0,1119520740,440114659 | 9,97E-06 | 0,001562433 |
| 1565651_at  | BI868311  |                     |                                                            |          | EG2 | 0 | 4 | 9  | 1  | 0,1119520740,440114659 | 9,97E-06 | 0,001562433 |
| 203505_at   | AF285167  | Hs.429294           | ATP-binding cassette, sub-family A (ABC1), member 1        | ABCA1    | EG2 | 4 | 0 | 3  | 7  | 0,1119520740,440114659 | 9,97E-06 | 0,001562433 |
| 203725_at   | NM_001924 | Hs.80409            | growth arrest and DNA-damage-inducible, alpha              | GADD45A  | EG2 | 4 | 0 | 5  | 5  | 0,1119520740,440114659 | 9,97E-06 | 0,001562433 |
| 203817_at   | W93728    | Hs.77890            | guanylate cyclase 1, soluble, beta 3                       | GUCY1B3  | EG2 | 2 | 2 | 3  | 7  | 0,1119520740,440114659 | 9,97E-06 | 0,001562433 |
| 204352_at   | NM_004619 | Hs.523930           | TNF receptor-associated factor 5                           | TRAF5    | EG2 | 1 | 3 | 2  | 8  | 0,1119520740,440114659 | 9,97E-06 | 0,001562433 |
| 204646_at   | NM_000110 | Hs.335034           | dihydropyrimidine dehydrogenase                            | DPYD     | EG2 | 2 | 2 | 2  | 8  | 0,1119520740,440114659 | 9,97E-06 | 0,001562433 |
| 205885_s_at | L12002    | Hs.555880           | integrin, alpha 4 (antigen CD49D, alpha 4 subunit of VL    | ITGA4    | EG2 | 2 | 2 | 3  | 7  | 0,1119520740,440114659 | 9,97E-06 | 0,001562433 |
| 205891_at   | NM_000676 | Hs.167046           | adenosine A2b receptor                                     | ADORA2B  | EG2 | 3 | 1 | 6  | 4  | 0,1119520740,440114659 | 9,97E-06 | 0,001562433 |
| 205966_at   | NM_005645 | Hs.502508           | TAF13 RNA polymerase II, TATA box binding protein (T       | TAF13    | EG2 | 4 | 0 | 3  | 7  | 0,1119520740,440114659 | 9,97E-06 | 0,001562433 |
| 207574_s_at | NM_015675 | Hs.110571           | growth arrest and DNA-damage-inducible, beta               | GADD45B  | EG2 | 2 | 2 | 5  | 5  | 0,1119520740,440114659 | 9,97E-06 | 0,001562433 |
| 209305_s_at | AF078077  | Hs.110571           | growth arrest and DNA-damage-inducible, beta               | GADD45B  | EG2 | 2 | 2 | 7  | 3  | 0,1119520740,440114659 | 9,97E-06 | 0,001562433 |
| 209561_at   | L38969    | Hs.169875           | thrombospondin 3                                           | THBS3    | EG2 | 1 | 3 | 4  | 6  | 0,1119520740,440114659 | 9,97E-06 | 0,001562433 |
| 210298_x_at | AF098518  | Hs.435369           | four and a half LIM domains 1                              | FHL1     | EG2 | 1 | 3 | 1  | 9  | 0,1119520740,440114659 | 9,97E-06 | 0,001562433 |
| 211317_s_at | AF041461  | Hs.390736           | CASP8 and FADD-like apoptosis regulator                    | CFLAR    | EG2 | 0 | 4 | 5  | 5  | 0,1119520740,440114659 | 9,97E-06 | 0,001562433 |
| 212092_at   | BE858180  | Hs.147492           | paternally expressed 10                                    | PEG10    | EG2 | 3 | 1 | 4  | 6  | 0,1119520740,440114659 | 9,97E-06 | 0,001562433 |
| 213416_at   | BG532690  | Hs.440955           | ceramide kinase-like                                       | CERKL    | EG2 | 1 | 3 | 0  | 10 | 0,1119520740,440114659 | 9,97E-06 | 0,001562433 |
| 213836_s_at | AW052084  | Hs.463964           |                                                            | WIPI49   | EG2 | 2 | 2 | 7  | 3  | 0,1119520740,440114659 | 9,97E-06 | 0,001562433 |
| 218543_s_at | NM_022750 | Hs.12646            | poly (ADP-ribose) polymerase family, member 12             | PARP12   | EG2 | 2 | 2 | 2  | 8  | 0,1119520740,440114659 | 9,97E-06 | 0,001562433 |
| 218613_at   | NM_018422 | Hs.434255           | pleckstrin and Sec7 domain containing 3                    | PSD3     | EG2 | 2 | 2 | 4  | 6  | 0,1119520740,440114659 | 9,97E-06 | 0,001562433 |
| 219073_s_at | NM_017784 | Hs.150122           | oxysterol binding protein-like 10                          | OSBPL10  | EG2 | 1 | 3 | 4  | 6  | 0,1119520740,440114659 | 9,97E-06 | 0,001562433 |
| 219279_at   | NM_017718 | Hs.46578            | dedicator of cytokinesis 10                                | DOCK10   | EG2 | 4 | 0 | 3  | 7  | 0,1119520740,440114659 | 9,97E-06 | 0,001562433 |
| 220260_at   | NM_018317 | Hs.479403           | TBC1 domain family, member 19                              | TBC1D19  | EG2 | 3 | 1 | 6  | 4  | 0,1119520740,440114659 | 9,97E-06 | 0,001562433 |
| 220892_s_at | NM_021154 | Hs.494261           | phosphoserine aminotransferase 1                           | PSAT1    | EG2 | 4 | 0 | 5  | 5  | 0,1119520740,440114659 | 9,97E-06 | 0,001562433 |
| 224847_at   | AW051349  | Hs.119882           | cyclin-dependent kinase 6                                  | CDK6     | EG2 | 3 | 1 | 5  | 5  | 0,1119520740,440114659 | 9,97E-06 | 0,001562433 |
| 225373_at   | BE271644  | Hs.47382, Hs.546421 |                                                            | C10orf54 | EG2 | 0 | 4 | 4  | 6  | 0,1119520740,440114659 | 9,97E-06 | 0,001562433 |
| 225529_at   | AI492175  | Hs.535257           | centaurin, beta 5                                          | CENTB5   | EG2 | 1 | 3 | 6  | 4  | 0,1119520740,440114659 | 9,97E-06 | 0,001562433 |
| 225931_s_at | AI954660  | Hs.195642           | chromosome 17 open reading frame 27                        | C17orf27 | EG2 | 0 | 4 | 5  | 5  | 0,1119520740,440114659 | 9,97E-06 | 0,001562433 |
| 226279_at   | AW471145  | Hs.25338            | protease, serine, 23                                       | PRSS23   | EG2 | 3 | 1 | 10 | 0  | 0,1119520740,440114659 | 9,97E-06 | 0,001562433 |
| 226419_s_at | AA046439  | Hs.68714            | splicing factor, arginine/serine-rich 1 (splicing factor 2 | SFRS1    | EG2 | 4 | 0 | 6  | 4  | 0,1119520740,440114659 | 9,97E-06 | 0,001562433 |
| 226558_at   | BE856637  |                     |                                                            |          | EG2 | 2 | 2 | 5  | 5  | 0,1119520740,440114659 | 9,97E-06 | 0,001562433 |
| 227059_at   | AI651255  | Hs.444329           | glypican 6                                                 | GPC6     | EG2 | 2 | 2 | 5  | 5  | 0,1119520740,440114659 | 9,97E-06 | 0,001562433 |
| 227566_at   | AW085558  | Hs.504352           |                                                            | HNT      | EG2 | 2 | 2 | 8  | 2  | 0,1119520740,440114659 | 9,97E-06 | 0,001562433 |
| 228617_at   | AA142842  | Hs.441975           |                                                            | BIRC4BP  | EG2 | 1 | 3 | 5  | 5  | 0,1119520740,440114659 | 9,97E-06 | 0,001562433 |
| 228762_at   | AW151924  | Hs.159142           | lunatic fringe homolog (Drosophila)                        | LFNG     | EG2 | 1 | 3 | 6  | 4  | 0,1119520740,440114659 | 9,97E-06 | 0,001562433 |
| 229371_at   | BF940010  | Hs.491611           | chromosome 8 open reading frame 40                         | C8orf40  | EG2 | 4 | 0 | 5  | 5  | 0,1119520740,440114659 | 9,97E-06 | 0,001562433 |
| 230703_at   | AA001543  | Hs.437831           | chromosome 14 open reading frame 32                        | C14orf32 | EG2 | 3 | 1 | 5  | 5  | 0,1119520740,440114659 | 9,97E-06 | 0,001562433 |
| 230886_at   | AW069499  |                     |                                                            |          | EG2 | 3 | 1 | 5  | 5  | 0,1119520740,440114659 | 9,97E-06 | 0,001562433 |
| 231057_at   | AU144266  | Hs.181326           | myotubularin related protein 2                             | MTMR2    | EG2 | 3 | 1 | 7  | 3  | 0,1119520740,440114659 | 9,97E-06 | 0,001562433 |
| 231890_at   | AK022804  |                     |                                                            |          | EG2 | 3 | 1 | 7  | 3  | 0,1119520740,440114659 | 9,97E-06 | 0,001562433 |
| 232412_at   | AK024690  | Hs.462946           | F-box and leucine-rich repeat protein 20                   | FBXL20   | EG2 | 2 | 2 | 4  | 6  | 0,1119520740,440114659 | 9,97E-06 | 0,001562433 |

|              |           |                                            |                                                                |              |     |   |   |   |                        |          |             |
|--------------|-----------|--------------------------------------------|----------------------------------------------------------------|--------------|-----|---|---|---|------------------------|----------|-------------|
| 235919_at    | AA227879  |                                            |                                                                | EG2          | 4   | 0 | 7 | 3 | 0,1119520740,440114659 | 9,97E-06 | 0,001562433 |
| 236229_at    | AW014345  | Hs.467370                                  |                                                                | LOC400721    | EG2 | 2 | 2 | 5 | 0,1119520740,440114659 | 9,97E-06 | 0,001562433 |
| 236492_at    | AI934447  | Hs.146339                                  | protein phosphatase 2 (formerly 2A), regulatory subunit        | PPP2R2A      | EG2 | 4 | 0 | 8 | 0,1119520740,440114659 | 9,97E-06 | 0,001562433 |
| 238449_at    | BG534511  | Hs.528462, Hs.531664, Hs.547315, Hs.556385 |                                                                | DKFZp547E087 | EG2 | 4 | 0 | 5 | 0,1119520740,440114659 | 9,97E-06 | 0,001562433 |
| 238824_at    | BF844863  |                                            |                                                                |              | EG2 | 2 | 2 | 5 | 0,1119520740,440114659 | 9,97E-06 | 0,001562433 |
| 242191_at    | AI701905  | Hs.445080, Hs.454852                       |                                                                | AE01         | EG2 | 3 | 1 | 6 | 0,1119520740,440114659 | 9,97E-06 | 0,001562433 |
| 1552643_at   | NM_145297 | Hs.50158                                   | zinc finger protein 626                                        | ZNF626       | EG2 | 2 | 2 | 5 | 0,1119520740,440114659 | 8,42E-05 | 0,002977773 |
| 1557685_at   | AK054840  | Hs.106015                                  | development and differentiation enhancing factor 1             | DDEF1        | EG2 | 2 | 2 | 3 | 0,1119520740,440114659 | 8,42E-05 | 0,002977773 |
| 1558143_a_at | AK027160  | Hs.469658                                  | BCL2-like 11 (apoptosis facilitator)                           | BCL2L11      | EG2 | 4 | 0 | 7 | 0,1119520740,440114659 | 8,42E-05 | 0,002977773 |
| 1566482_at   | AL833114  | Hs.368986                                  |                                                                | LOC400047    | EG2 | 2 | 2 | 5 | 0,1119520740,440114659 | 8,42E-05 | 0,002977773 |
| 1566557_at   | AK096609  | Hs.448889                                  |                                                                | FLJ90757     | EG2 | 0 | 4 | 0 | 0,1119520740,440114659 | 8,42E-05 | 0,002977773 |
| 1569022_a_at | BC040952  | Hs.175343                                  | phosphoinositide-3-kinase, class 2, alpha polypeptide          | PIK3C2A      | EG2 | 3 | 1 | 6 | 0,1119520740,440114659 | 8,42E-05 | 0,002977773 |
| 200965_s_at  | NM_006720 | Hs.438236                                  | actin binding LIM protein 1                                    | ABLIM1       | EG2 | 2 | 2 | 2 | 0,1119520740,440114659 | 8,42E-05 | 0,002977773 |
| 202345_s_at  | NM_001444 | Hs.408061                                  | fatty acid binding protein 5 (psoriasis-associated)            | FABP5        | EG2 | 4 | 0 | 4 | 0,1119520740,440114659 | 8,42E-05 | 0,002977773 |
| 202742_s_at  | NM_002731 | Hs.487325                                  | protein kinase, cAMP-dependent, catalytic, beta                | PRKACB       | EG2 | 4 | 0 | 5 | 0,1119520740,440114659 | 8,42E-05 | 0,002977773 |
| 202761_s_at  | NM_015180 | Hs.525392                                  | spectrin repeat containing, nuclear envelope 2                 | SYNE2        | EG2 | 4 | 0 | 3 | 0,1119520740,440114659 | 8,42E-05 | 0,002977773 |
| 202897_at    | AB023430  | Hs.128846                                  | protein tyrosine phosphatase, non-receptor type subunit        | PTPNS1       | EG2 | 1 | 3 | 5 | 0,1119520740,440114659 | 8,42E-05 | 0,002977773 |
| 203128_at    | NM_004863 | Hs.435661                                  | serine palmitoyltransferase, long chain base subunit 2         | SPTLC2       | EG2 | 0 | 4 | 7 | 0,1119520740,440114659 | 8,42E-05 | 0,002977773 |
| 203492_x_at  | AA918224  | Hs.101014                                  |                                                                | PIG8         | EG2 | 3 | 1 | 4 | 0,1119520740,440114659 | 8,42E-05 | 0,002977773 |
| 203493_s_at  | AL525206  | Hs.101014                                  |                                                                | PIG8         | EG2 | 3 | 1 | 4 | 0,1119520740,440114659 | 8,42E-05 | 0,002977773 |
| 203753_at    | NM_003199 | Hs.200285                                  | transcription factor 4                                         | TCF4         | EG2 | 0 | 4 | 4 | 0,1119520740,440114659 | 8,42E-05 | 0,002977773 |
| 203821_at    | NM_001945 | Hs.799                                     | heparin-binding EGF-like growth factor                         | HBEGF        | EG2 | 4 | 0 | 9 | 0,1119520740,440114659 | 8,42E-05 | 0,002977773 |
| 203921_at    | NM_004267 | Hs.8786                                    | carbohydrate (N-acetylglucosamine-6-O) sulfotransferase        | CHST2        | EG2 | 2 | 2 | 7 | 0,1119520740,440114659 | 8,42E-05 | 0,002977773 |
| 204088_at    | NM_002560 | Hs.321709                                  | purinergic receptor P2X, ligand-gated ion channel, 4           | P2RX4        | EG2 | 1 | 3 | 3 | 0,1119520740,440114659 | 8,42E-05 | 0,002977773 |
| 204363_at    | NM_001993 | Hs.62192                                   | coagulation factor III (thromboplastin, tissue factor)         | F3           | EG2 | 1 | 3 | 2 | 0,1119520740,440114659 | 8,42E-05 | 0,002977773 |
| 204663_at    | NM_006680 | Hs.199743                                  | malic enzyme 3, NADP(+)-dependent, mitochondrial               | ME3          | EG2 | 0 | 4 | 8 | 0,1119520740,440114659 | 8,42E-05 | 0,002977773 |
| 204720_s_at  | AV729634  | Hs.536063                                  | DnaJ (Hsp40) homolog, subfamily C, member 6                    | DNAJC6       | EG2 | 3 | 1 | 6 | 0,1119520740,440114659 | 8,42E-05 | 0,002977773 |
| 204862_s_at  | NM_002513 | Hs.514065                                  | non-metastatic cells 3, protein expressed in                   | NME3         | EG2 | 1 | 3 | 5 | 0,1119520740,440114659 | 8,42E-05 | 0,002977773 |
| 205379_at    | NM_001236 | Hs.154510                                  | carbonyl reductase 3                                           | CBR3         | EG2 | 2 | 2 | 1 | 0,1119520740,440114659 | 8,42E-05 | 0,002977773 |
| 205648_at    | NM_003391 | Hs.128553                                  | wingless-type MMTV integration site family member 2            | WNT2         | EG2 | 0 | 4 | 1 | 0,1119520740,440114659 | 8,42E-05 | 0,002977773 |
| 206025_s_at  | AW188198  | Hs.437322                                  | tumor necrosis factor, alpha-induced protein 6                 | TNFAIP6      | EG2 | 2 | 2 | 8 | 0,1119520740,440114659 | 8,42E-05 | 0,002977773 |
| 207304_at    | NM_003425 | Hs.381285                                  | zinc finger protein 45                                         | ZNF45        | EG2 | 0 | 4 | 7 | 0,1119520740,440114659 | 8,42E-05 | 0,002977773 |
| 209015_s_at  | BC002446  | Hs.490745                                  | DnaJ (Hsp40) homolog, subfamily B, member 6                    | DNAJB6       | EG2 | 4 | 0 | 3 | 0,1119520740,440114659 | 8,42E-05 | 0,002977773 |
| 209292_at    | AL022726  | Hs.519601                                  | inhibitor of DNA binding 4, dominant negative helix-loop       | ID4          | EG2 | 3 | 1 | 8 | 0,1119520740,440114659 | 8,42E-05 | 0,002977773 |
| 209829_at    | AB002384  | Hs.484915                                  | chromosome 6 open reading frame 32                             | C6orf32      | EG2 | 3 | 1 | 0 | 0,1119520740,440114659 | 8,42E-05 | 0,002977773 |
| 211981_at    | NM_001845 | Hs.17441                                   | collagen, type IV, alpha 1                                     | COL4A1       | EG2 | 2 | 2 | 4 | 0,1119520740,440114659 | 8,42E-05 | 0,002977773 |
| 212070_at    | AL554008  | Hs.513633                                  | G protein-coupled receptor 56                                  | GPR56        | EG2 | 0 | 4 | 9 | 0,1119520740,440114659 | 8,42E-05 | 0,002977773 |
| 212136_at    | AW517686  | Hs.343522                                  | ATPase, Ca++ transporting, plasma membrane 4                   | ATP2B4       | EG2 | 2 | 2 | 5 | 0,1119520740,440114659 | 8,42E-05 | 0,002977773 |
| 212607_at    | N32526    | Hs.498292                                  | v-akt murine thymoma viral oncogene homolog 3 (pro             | AKT3         | EG2 | 4 | 0 | 3 | 0,1119520740,440114659 | 8,42E-05 | 0,002977773 |
| 213069_at    | AI148659  | Hs.477420                                  | HEG homolog 1 (zebrafish)                                      | HEG1         | EG2 | 1 | 3 | 6 | 0,1119520740,440114659 | 8,42E-05 | 0,002977773 |
| 213435_at    | AB028957  | Hs.516617                                  | SATB family member 2                                           | SATB2        | EG2 | 3 | 1 | 7 | 0,1119520740,440114659 | 8,42E-05 | 0,002977773 |
| 213449_at    | D31765    | Hs.252828                                  | processing of precursor 1, ribonuclease P/MRP subunit          | POP1         | EG2 | 2 | 2 | 6 | 0,1119520740,440114659 | 8,42E-05 | 0,002977773 |
| 213652_at    | AU152579  | Hs.368542                                  | proprotein convertase subtilisin/kexin type 5                  | PCSK5        | EG2 | 3 | 1 | 3 | 0,1119520740,440114659 | 8,42E-05 | 0,002977773 |
| 216035_x_at  | AV721430  | Hs.501080                                  | transcription factor 7-like 2 (T-cell specific, HMG-box)       | TCF7L2       | EG2 | 2 | 2 | 6 | 0,1119520740,440114659 | 8,42E-05 | 0,002977773 |
| 217452_s_at  | Y15014    | Hs.518834                                  | UDP-Gal:betaGlcNAc beta 1,3-galactosyltransferase, polypeptide | B3GALT2      | EG2 | 3 | 1 | 3 | 0,1119520740,440114659 | 8,42E-05 | 0,002977773 |



|             |           |            |                                                        |              |     |   |   |   |   |                        |          |             |
|-------------|-----------|------------|--------------------------------------------------------|--------------|-----|---|---|---|---|------------------------|----------|-------------|
| 218537_at   | NM_017885 | Hs.412304, | H host cell factor C1 regulator 1 (XPO1 dependant)     | HCFC1R1      | EG2 | 0 | 4 | 5 | 4 | 0,1119520740,440114659 | 8,42E-05 | 0,002977773 |
| 219737_s_at | AI524125  | Hs.407643  | protocadherin 9                                        | PCDH9        | EG2 | 2 | 2 | 7 | 2 | 0,1119520740,440114659 | 8,42E-05 | 0,002977773 |
| 220651_s_at | NM_018518 | Hs.198363  | MCM10 minichromosome maintenance deficient 10 (S       | MCM10        | EG2 | 3 | 1 | 4 | 5 | 0,1119520740,440114659 | 8,42E-05 | 0,002977773 |
| 221127_s_at | NM_006394 | Hs.292156  |                                                        | RIG          | EG2 | 0 | 4 | 3 | 6 | 0,1119520740,440114659 | 8,42E-05 | 0,002977773 |
| 221423_s_at | NM_030799 | Hs.372050  | Yip1 domain family, member 5                           | YIPF5        | EG2 | 3 | 1 | 5 | 4 | 0,1119520740,440114659 | 8,42E-05 | 0,002977773 |
| 222044_at   | AI199589  | Hs.472856  | chromosome 20 open reading frame 67                    | C20orf67     | EG2 | 2 | 2 | 6 | 3 | 0,1119520740,440114659 | 8,42E-05 | 0,002977773 |
| 222557_at   | AL353715  | Hs.348326  | stathmin-like 3                                        | STMN3        | EG2 | 0 | 4 | 3 | 6 | 0,1119520740,440114659 | 8,42E-05 | 0,002977773 |
| 222853_at   | N71923    | Hs.41296   | fibronectin leucine rich transmembrane protein 3       | FLRT3        | EG2 | 0 | 4 | 4 | 5 | 0,1119520740,440114659 | 8,42E-05 | 0,002977773 |
| 223315_at   | AF278532  | Hs.201034  | netrin 4                                               | NTN4         | EG2 | 2 | 2 | 1 | 8 | 0,1119520740,440114659 | 8,42E-05 | 0,002977773 |
| 223614_at   | AL136588  | Hs.492187  |                                                        | DKFZp761D112 | EG2 | 2 | 2 | 7 | 2 | 0,1119520740,440114659 | 8,42E-05 | 0,002977773 |
| 223805_at   | AF323728  | Hs.318775  | oxysterol binding protein-like 6                       | OSBPL6       | EG2 | 3 | 1 | 6 | 3 | 0,1119520740,440114659 | 8,42E-05 | 0,002977773 |
| 225724_at   | AW136120  | Hs.531089  | proteasome (prosome, macropain) subunit, alpha typ     | PSMA3        | EG2 | 3 | 1 | 5 | 4 | 0,1119520740,440114659 | 8,42E-05 | 0,002977773 |
| 225879_at   | BF345244  | Hs.378501  | tRNA splicing endonuclease 54 homolog (SEN54, S. cer   | TSEN54       | EG2 | 1 | 3 | 6 | 3 | 0,1119520740,440114659 | 8,42E-05 | 0,002977773 |
| 225957_at   | AI307750  | Hs.484195  | adult retina protein                                   | LOC153222    | EG2 | 2 | 2 | 5 | 4 | 0,1119520740,440114659 | 8,42E-05 | 0,002977773 |
| 226150_at   | BF111651  | Hs.437179  | phosphatidic acid phosphatase type 2 domain containi   | PPAPDC1B     | EG2 | 3 | 1 | 8 | 1 | 0,1119520740,440114659 | 8,42E-05 | 0,002977773 |
| 226157_at   | AI569747  | Hs.379018  | transcription factor Dp-2 (E2F dimerization partner 2) | TFDP2        | EG2 | 2 | 2 | 6 | 3 | 0,1119520740,440114659 | 8,42E-05 | 0,002977773 |
| 226210_s_at | AI291123  | Hs.525589, | H maternally expressed 3                               | MEG3         | EG2 | 0 | 4 | 3 | 6 | 0,1119520740,440114659 | 8,42E-05 | 0,002977773 |
| 226670_s_at | AL109839  | Hs.411022  | chromosome 20 open reading frame 119                   | C20orf119    | EG2 | 2 | 2 | 6 | 3 | 0,1119520740,440114659 | 8,42E-05 | 0,002977773 |
| 226869_at   | AI655611  |            |                                                        |              | EG2 | 1 | 3 | 1 | 8 | 0,1119520740,440114659 | 8,42E-05 | 0,002977773 |
| 227051_at   | AU157716  |            |                                                        |              | EG2 | 2 | 2 | 8 | 1 | 0,1119520740,440114659 | 8,42E-05 | 0,002977773 |
| 227088_at   | BF221547  | Hs.370661  | phosphodiesterase 5A, cGMP-specific                    | PDE5A        | EG2 | 3 | 1 | 2 | 7 | 0,1119520740,440114659 | 8,42E-05 | 0,002977773 |
| 227249_at   | AI857685  | Hs.460107  | nudE nuclear distribution gene E homolog 1 (A. nidula  | NDE1         | EG2 | 2 | 2 | 4 | 5 | 0,1119520740,440114659 | 8,42E-05 | 0,002977773 |
| 227605_at   | AI762870  | Hs.480465  | small inducible cytokine subfamily E, member 1 (endo   | SCYE1        | EG2 | 3 | 1 | 3 | 6 | 0,1119520740,440114659 | 8,42E-05 | 0,002977773 |
| 227649_s_at | AU144000  | Hs.497575  | SLIT-ROBO Rho GTPase activating protein 2              | SRGAP2       | EG2 | 2 | 2 | 6 | 3 | 0,1119520740,440114659 | 8,42E-05 | 0,002977773 |
| 228062_at   | AW025330  | Hs.12554   | nucleosome assembly protein 1-like 5                   | NAP1L5       | EG2 | 3 | 1 | 7 | 2 | 0,1119520740,440114659 | 8,42E-05 | 0,002977773 |
| 228885_at   | AI862120  | Hs.127386  | MAM domain containing 2                                | MAMDC2       | EG2 | 1 | 3 | 6 | 3 | 0,1119520740,440114659 | 8,42E-05 | 0,002977773 |
| 228927_at   | AW291411  | Hs.464896  | zinc finger protein 397                                | ZNF397       | EG2 | 4 | 0 | 3 | 6 | 0,1119520740,440114659 | 8,42E-05 | 0,002977773 |
| 229549_at   | AA868461  | Hs.550465  | opsin 1 (cone pigments), short-wave-sensitive (color   | OPN1SW       | EG2 | 4 | 0 | 7 | 2 | 0,1119520740,440114659 | 8,42E-05 | 0,002977773 |
| 229693_at   | AI952836  | Hs.462230  |                                                        | LOC388335    | EG2 | 1 | 3 | 2 | 7 | 0,1119520740,440114659 | 8,42E-05 | 0,002977773 |
| 229886_at   | AA502768  | Hs.448041  |                                                        | FLJ32363     | EG2 | 3 | 1 | 3 | 6 | 0,1119520740,440114659 | 8,42E-05 | 0,002977773 |
| 230218_at   | BF476403  |            |                                                        |              | EG2 | 2 | 2 | 2 | 7 | 0,1119520740,440114659 | 8,42E-05 | 0,002977773 |
| 231234_at   | AV699565  | Hs.128065  | cathepsin C                                            | CTSC         | EG2 | 2 | 2 | 5 | 4 | 0,1119520740,440114659 | 8,42E-05 | 0,002977773 |
| 231513_at   | BF111326  | Hs.1547    | potassium inwardly-rectifying channel, subfamily J, m  | KCNJ2        | EG2 | 3 | 1 | 4 | 5 | 0,1119520740,440114659 | 8,42E-05 | 0,002977773 |
| 231779_at   | AI246590  | Hs.449207  | interleukin-1 receptor-associated kinase 2             | IRAK2        | EG2 | 3 | 1 | 8 | 1 | 0,1119520740,440114659 | 8,42E-05 | 0,002977773 |
| 231807_at   | AL157473  | Hs.445885  | KIAA1217                                               | KIAA1217     | EG2 | 1 | 3 | 1 | 8 | 0,1119520740,440114659 | 8,42E-05 | 0,002977773 |
| 231956_at   | AA976354  | Hs.514554  | KIAA1618                                               | KIAA1618     | EG2 | 1 | 3 | 4 | 5 | 0,1119520740,440114659 | 8,42E-05 | 0,002977773 |
| 232038_at   | AI052103  | Hs.121396  | chromosome 6 open reading frame 170                    | C6orf170     | EG2 | 3 | 1 | 4 | 5 | 0,1119520740,440114659 | 8,42E-05 | 0,002977773 |
| 232238_at   | AK001380  | Hs.121028  | asp (abnormal spindle)-like, microcephaly associated   | ASPM         | EG2 | 2 | 2 | 2 | 7 | 0,1119520740,440114659 | 8,42E-05 | 0,002977773 |
| 232589_at   | AK021551  |            |                                                        |              | EG2 | 2 | 2 | 3 | 6 | 0,1119520740,440114659 | 8,42E-05 | 0,002977773 |
| 232865_at   | N59653    | Hs.519313  | AF4/FMR2 family, member 4                              | AFF4         | EG2 | 2 | 2 | 7 | 2 | 0,1119520740,440114659 | 8,42E-05 | 0,002977773 |
| 233223_at   | AK000850  | Hs.37982   | neural precursor cell expressed, developmentally do    | NEDD9        | EG2 | 1 | 3 | 8 | 1 | 0,1119520740,440114659 | 8,42E-05 | 0,002977773 |
| 236009_at   | AI767250  |            |                                                        |              | EG2 | 3 | 1 | 7 | 2 | 0,1119520740,440114659 | 8,42E-05 | 0,002977773 |
| 236016_at   | AI702962  | Hs.463010  | SWI/SNF related, matrix associated, actin dependent r  | SMARCE1      | EG2 | 0 | 4 | 5 | 4 | 0,1119520740,440114659 | 8,42E-05 | 0,002977773 |
| 238469_at   | BE620374  | Hs.368337  | chromosome 6 open reading frame 155                    | C6orf155     | EG2 | 4 | 0 | 7 | 2 | 0,1119520740,440114659 | 8,42E-05 | 0,002977773 |
| 238860_at   | AA398043  | Hs.227457  | chromosome 6 open reading frame 130                    | C6orf130     | EG2 | 1 | 3 | 2 | 7 | 0,1119520740,440114659 | 8,42E-05 | 0,002977773 |

|              |           |            |                                                         |           |     |   |   |    |    |                        |          |             |
|--------------|-----------|------------|---------------------------------------------------------|-----------|-----|---|---|----|----|------------------------|----------|-------------|
| 239043_at    | AA084273  | Hs.76561   | zinc finger protein 404                                 | ZNF404    | EG2 | 1 | 3 | 6  | 3  | 0,1119520740,440114659 | 8,42E-05 | 0,002977773 |
| 239231_at    | BE464819  |            |                                                         |           | EG2 | 3 | 1 | 3  | 6  | 0,1119520740,440114659 | 8,42E-05 | 0,002977773 |
| 239587_at    | AI686890  |            |                                                         |           | EG2 | 2 | 2 | 7  | 2  | 0,1119520740,440114659 | 8,42E-05 | 0,002977773 |
| 240145_at    | AW628059  |            |                                                         |           | EG2 | 1 | 3 | 3  | 6  | 0,1119520740,440114659 | 8,42E-05 | 0,002977773 |
| 241484_x_at  | AI668696  |            |                                                         |           | EG2 | 2 | 2 | 7  | 2  | 0,1119520740,440114659 | 8,42E-05 | 0,002977773 |
| 241820_at    | BF666241  | Hs.536537  | RAP1 interacting factor homolog (yeast)                 | RIF1      | EG2 | 2 | 2 | 5  | 4  | 0,1119520740,440114659 | 8,42E-05 | 0,002977773 |
| 242052_at    | AW979272  | Hs.505202  | bicaudal D homolog 1 (Drosophila)                       | BICD1     | EG2 | 0 | 4 | 6  | 3  | 0,1119520740,440114659 | 8,42E-05 | 0,002977773 |
| 37892_at     | J04177    | Hs.523446  | collagen, type XI, alpha 1                              | COL11A1   | EG2 | 0 | 4 | 3  | 6  | 0,1119520740,440114659 | 8,42E-05 | 0,002977773 |
| 229872_s_at  | AA532655  | Hs.549388  |                                                         | LOC440667 | EG2 | 0 | 3 | 3  | 11 | 0,2913855570,799386187 | 2,17E-10 | 0,001562433 |
| 231907_at    | AK025877  | Hs.159472  | v-abl Abelson murine leukemia viral oncogene homol      | ABL2      | EG2 | 2 | 1 | 9  | 5  | 0,2913855570,799386187 | 2,17E-10 | 0,001562433 |
| 1555788_a_at | AF250311  | Hs.516826  | tribbles homolog 3 (Drosophila)                         | TRIB3     | EG2 | 1 | 2 | 8  | 5  | 0,2913855570,799386187 | 4,56E-09 | 0,001562433 |
| 204222_s_at  | NM_006851 | Hs.553516  | GLI pathogenesis-related 1 (glioma)                     | GLIPR1    | EG2 | 3 | 0 | 7  | 6  | 0,2913855570,799386187 | 4,56E-09 | 0,001562433 |
| 211272_s_at  | AF064771  | Hs.524488  | diacylglycerol kinase, alpha 80kDa                      | DGKA      | EG2 | 2 | 1 | 5  | 8  | 0,2913855570,799386187 | 4,56E-09 | 0,001562433 |
| 215307_at    | AL109722  |            |                                                         |           | EG2 | 2 | 1 | 6  | 7  | 0,2913855570,799386187 | 4,56E-09 | 0,001562433 |
| 217914_at    | NM_017901 | Hs.524763  | two pore segment channel 1                              | TPCN1     | EG2 | 1 | 2 | 5  | 8  | 0,2913855570,799386187 | 4,56E-09 | 0,001562433 |
| 218953_s_at  | NM_024028 | Hs.483796  |                                                         | MGC3265   | EG2 | 2 | 1 | 6  | 7  | 0,2913855570,799386187 | 4,56E-09 | 0,001562433 |
| 227530_at    | BF511276  | Hs.371240  | A kinase (PRKA) anchor protein (gravin) 12              | AKAP12    | EG2 | 1 | 2 | 7  | 6  | 0,2913855570,799386187 | 4,56E-09 | 0,001562433 |
| 228726_at    | AW512196  | Hs.381167  | serpin peptidase inhibitor, clade B (ovalbumin), mem    | SERPINB1  | EG2 | 2 | 1 | 5  | 8  | 0,2913855570,799386187 | 4,56E-09 | 0,001562433 |
| 231993_at    | AK026784  |            |                                                         |           | EG2 | 2 | 1 | 4  | 9  | 0,2913855570,799386187 | 4,56E-09 | 0,001562433 |
| 203157_s_at  | AB020645  | Hs.116448  | glutaminase                                             | GLS       | EG2 | 3 | 0 | 8  | 4  | 0,2913855570,799386187 | 7,43E-08 | 0,001562433 |
| 203708_at    | NM_002600 | Hs.198072  | phosphodiesterase 4B, cAMP-specific (phosphodieste      | PDE4B     | EG2 | 1 | 2 | 5  | 7  | 0,2913855570,799386187 | 7,43E-08 | 0,001562433 |
| 206342_x_at  | NM_006123 | Hs.460960  | iduronate 2-sulfatase (Hunter syndrome)                 | IDS       | EG2 | 2 | 1 | 8  | 4  | 0,2913855570,799386187 | 7,43E-08 | 0,001562433 |
| 210511_s_at  | M13436    | Hs.28792   | inhibin, beta A (activin A, activin AB alpha polypeptid | INHBA     | EG2 | 2 | 1 | 9  | 3  | 0,2913855570,799386187 | 7,43E-08 | 0,001562433 |
| 212311_at    | AA522514  | Hs.479384  |                                                         | KIAA0746  | EG2 | 1 | 2 | 9  | 3  | 0,2913855570,799386187 | 7,43E-08 | 0,001562433 |
| 219773_at    | NM_016931 | Hs.371036  | NADPH oxidase 4                                         | NOX4      | EG2 | 1 | 2 | 4  | 8  | 0,2913855570,799386187 | 7,43E-08 | 0,001562433 |
| 221019_s_at  | NM_030781 | Hs.464422  | collectin sub-family member 12                          | COLEC12   | EG2 | 0 | 3 | 2  | 10 | 0,2913855570,799386187 | 7,43E-08 | 0,001562433 |
| 225919_s_at  | AI832598  | Hs.493639  | chromosome 9 open reading frame 72                      | C9orf72   | EG2 | 3 | 0 | 8  | 4  | 0,2913855570,799386187 | 7,43E-08 | 0,001562433 |
| 235629_at    | AI333596  | Hs.203717  | fibronectin 1                                           | FN1       | EG2 | 2 | 1 | 6  | 6  | 0,2913855570,799386187 | 7,43E-08 | 0,001562433 |
| 235944_at    | BF446673  | Hs.58877   | hemicentin 1                                            | HMCN1     | EG2 | 2 | 1 | 5  | 7  | 0,2913855570,799386187 | 7,43E-08 | 0,001562433 |
| 238622_at    | AW269686  | Hs.98643   | RAP2B, member of RAS oncogene family                    | RAP2B     | EG2 | 2 | 1 | 4  | 8  | 0,2913855570,799386187 | 7,43E-08 | 0,001562433 |
| 201141_at    | NM_002510 | Hs.190495  | glycoprotein (transmembrane) nmb                        | GPNMB     | EG2 | 1 | 2 | 9  | 2  | 0,2913855570,799386187 | 9,59E-07 | 0,001562433 |
| 201360_at    | NM_000099 | Hs.304682  | cystatin C (amyloid angiopathy and cerebral hemorrha    | CST3      | EG2 | 0 | 3 | 5  | 6  | 0,2913855570,799386187 | 9,59E-07 | 0,001562433 |
| 203108_at    | NM_003979 | Hs.546325  | G protein-coupled receptor, family C, group 5, membe    | GPRC5A    | EG2 | 1 | 2 | 4  | 7  | 0,2913855570,799386187 | 9,59E-07 | 0,001562433 |
| 203908_at    | NM_003759 | Hs.5462    | solute carrier family 4, sodium bicarbonate cotranspor  | SLC4A4    | EG2 | 2 | 1 | 9  | 2  | 0,2913855570,799386187 | 9,59E-07 | 0,001562433 |
| 204678_s_at  | U90065    | Hs.208544  | potassium channel, subfamily K, member 1                | KCNK1     | EG2 | 1 | 2 | 9  | 2  | 0,2913855570,799386187 | 9,59E-07 | 0,001562433 |
| 210534_s_at  | BC002944  | Hs.462445  |                                                         | EPPB9     | EG2 | 1 | 2 | 8  | 3  | 0,2913855570,799386187 | 9,59E-07 | 0,001562433 |
| 213032_at    | AI186739  | Hs.370359  | nuclear factor I/B                                      | NFIB      | EG2 | 2 | 1 | 3  | 8  | 0,2913855570,799386187 | 9,59E-07 | 0,001562433 |
| 213703_at    | W95043    | Hs.531822  |                                                         | LOC150759 | EG2 | 3 | 0 | 9  | 2  | 0,2913855570,799386187 | 9,59E-07 | 0,001562433 |
| 214701_s_at  | AJ276395  | Hs.203717  | fibronectin 1                                           | FN1       | EG2 | 2 | 1 | 5  | 6  | 0,2913855570,799386187 | 9,59E-07 | 0,001562433 |
| 226492_at    | AL036088  | Hs.511265  | sema domain, transmembrane domain (TM), and cyto        | SEMA6D    | EG2 | 0 | 3 | 8  | 3  | 0,2913855570,799386187 | 9,59E-07 | 0,001562433 |
| 227955_s_at  | BE670307  |            |                                                         |           | EG2 | 2 | 1 | 6  | 5  | 0,2913855570,799386187 | 9,59E-07 | 0,001562433 |
| 228057_at    | AA528140  | Hs.480378  | DNA-damage-inducible transcript 4-like                  | DDIT4L    | EG2 | 2 | 1 | 9  | 2  | 0,2913855570,799386187 | 9,59E-07 | 0,001562433 |
| 235457_at    | AI769569  | Hs.428214  | mastermind-like 2 (Drosophila)                          | MAML2     | EG2 | 3 | 0 | 2  | 9  | 0,2913855570,799386187 | 9,59E-07 | 0,001562433 |
| 237411_at    | N71063    | Hs.344757, | HADAM metalloproteinase with thrombospondin type 1      | ADAMTS6   | EG2 | 1 | 2 | 10 | 1  | 0,2913855570,799386187 | 9,59E-07 | 0,001562433 |
| 1555526_a_at | AF403061  | Hs.496666  | septin 6                                                | SEPT6     | EG2 | 3 | 0 | 3  | 7  | 0,2913855570,799386187 | 9,97E-06 | 0,001562433 |

|              |           |            |                                                        |           |     |   |   |   |   |                        |          |             |
|--------------|-----------|------------|--------------------------------------------------------|-----------|-----|---|---|---|---|------------------------|----------|-------------|
| 1558199_at   | W73431    | Hs.203717  | fibronectin 1                                          | FN1       | EG2 | 3 | 0 | 6 | 4 | 0,2913855570,799386187 | 9,97E-06 | 0,001562433 |
| 1568609_s_at | AL118843  | Hs.381235, | H phosphodiesterase 4D interacting protein (myomegali  | PDE4DIP   | EG2 | 1 | 2 | 5 | 5 | 0,2913855570,799386187 | 9,97E-06 | 0,001562433 |
| 1569472_s_at | BC026260  | Hs.368214  | tetratricopeptide repeat domain 3                      | TTC3      | EG2 | 2 | 1 | 6 | 4 | 0,2913855570,799386187 | 9,97E-06 | 0,001562433 |
| 205347_s_at  | NM_021992 | Hs.56145   | thymosin-like 8                                        | TMSL8     | EG2 | 3 | 0 | 4 | 6 | 0,2913855570,799386187 | 9,97E-06 | 0,001562433 |
| 205381_at    | NM_005824 | Hs.550454  | leucine rich repeat containing 17                      | LRRC17    | EG2 | 0 | 3 | 3 | 7 | 0,2913855570,799386187 | 9,97E-06 | 0,001562433 |
| 205397_x_at  | U76622    | Hs.36915,  | Hs SMAD, mothers against DPP homolog 3 (Drosophila)    | SMAD3     | EG2 | 1 | 2 | 4 | 6 | 0,2913855570,799386187 | 9,97E-06 | 0,001562433 |
| 207357_s_at  | NM_017540 | Hs.34421,  | Hs UDP-N-acetyl-alpha-D-galactosamine:polypeptide N-   | GALNT10   | EG2 | 1 | 2 | 8 | 2 | 0,2913855570,799386187 | 9,97E-06 | 0,001562433 |
| 209406_at    | AF095192  | Hs.55220   | BCL2-associated athanogene 2                           | BAG2      | EG2 | 2 | 1 | 5 | 5 | 0,2913855570,799386187 | 9,97E-06 | 0,001562433 |
| 209598_at    | AB020690  | Hs.521466  | paraneoplastic antigen MA2                             | PNMA2     | EG2 | 0 | 3 | 4 | 6 | 0,2913855570,799386187 | 9,97E-06 | 0,001562433 |
| 209760_at    | AL136932  | Hs.205572  |                                                        | KIAA0922  | EG2 | 2 | 1 | 1 | 9 | 0,2913855570,799386187 | 9,97E-06 | 0,001562433 |
| 210102_at    | BC001234  | Hs.152944  | loss of heterozygosity, 11, chromosomal region 2, gen  | LOH11CR2A | EG2 | 3 | 0 | 4 | 6 | 0,2913855570,799386187 | 9,97E-06 | 0,001562433 |
| 210869_s_at  | M29277    | Hs.511397  | melanoma cell adhesion molecule                        | MCAM      | EG2 | 2 | 1 | 3 | 7 | 0,2913855570,799386187 | 9,97E-06 | 0,001562433 |
| 211376_s_at  | BC005212  | Hs.258798  | chromosome 10 open reading frame 86                    | C10orf86  | EG2 | 1 | 2 | 3 | 7 | 0,2913855570,799386187 | 9,97E-06 | 0,001562433 |
| 214587_at    | BE877796  | Hs.134830  | collagen, type VIII, alpha 1                           | COL8A1    | EG2 | 2 | 1 | 5 | 5 | 0,2913855570,799386187 | 9,97E-06 | 0,001562433 |
| 216048_s_at  | AK023621  | Hs.445030  | Rho-related BTB domain containing 3                    | RHOBTB3   | EG2 | 2 | 1 | 5 | 5 | 0,2913855570,799386187 | 9,97E-06 | 0,001562433 |
| 218717_s_at  | NM_018192 | Hs.374191  | leprecan-like 1                                        | LEPREL1   | EG2 | 2 | 1 | 8 | 2 | 0,2913855570,799386187 | 9,97E-06 | 0,001562433 |
| 219506_at    | NM_024579 | Hs.91283   | chromosome 1 open reading frame 54                     | C1orf54   | EG2 | 0 | 3 | 5 | 5 | 0,2913855570,799386187 | 9,97E-06 | 0,001562433 |
| 221679_s_at  | AF225418  | Hs.476454  | abhydrolase domain containing 6                        | ABHD6     | EG2 | 2 | 1 | 8 | 2 | 0,2913855570,799386187 | 9,97E-06 | 0,001562433 |
| 225583_at    | AL573637  | Hs.469561  | UDP-glucuronate decarboxylase 1                        | UXS1      | EG2 | 2 | 1 | 3 | 7 | 0,2913855570,799386187 | 9,97E-06 | 0,001562433 |
| 227074_at    | AA524669  | Hs.348418  | down-regulator of transcription 1, TBP-binding (negati | DR1       | EG2 | 1 | 2 | 3 | 7 | 0,2913855570,799386187 | 9,97E-06 | 0,001562433 |
| 227290_at    | AU157881  |            |                                                        |           | EG2 | 2 | 1 | 5 | 5 | 0,2913855570,799386187 | 9,97E-06 | 0,001562433 |
| 227415_at    | BF109303  | Hs.527910  | diacylglycerol kinase, eta                             | DGKH      | EG2 | 3 | 0 | 3 | 7 | 0,2913855570,799386187 | 9,97E-06 | 0,001562433 |
| 227487_s_at  | AI359165  | Hs.38449   | serpin peptidase inhibitor, clade E (nexin, plasminoge | SERPINE2  | EG2 | 1 | 2 | 9 | 1 | 0,2913855570,799386187 | 9,97E-06 | 0,001562433 |
| 227802_at    | AI075999  | Hs.518801  |                                                        | LOC441022 | EG2 | 2 | 1 | 5 | 5 | 0,2913855570,799386187 | 9,97E-06 | 0,001562433 |
| 228158_at    | AI623211  |            |                                                        |           | EG2 | 2 | 1 | 4 | 6 | 0,2913855570,799386187 | 9,97E-06 | 0,001562433 |
| 228191_at    | AA206016  |            |                                                        |           | EG2 | 3 | 0 | 7 | 3 | 0,2913855570,799386187 | 9,97E-06 | 0,001562433 |
| 228242_at    | BF055201  |            |                                                        |           | EG2 | 3 | 0 | 3 | 7 | 0,2913855570,799386187 | 9,97E-06 | 0,001562433 |
| 228566_at    | AA778694  | Hs.464912  |                                                        | P15RS     | EG2 | 3 | 0 | 7 | 3 | 0,2913855570,799386187 | 9,97E-06 | 0,001562433 |
| 229285_at    | AI669749  | Hs.518545  | ribonuclease L (2',5'-oligoadenylate synthetase-de     | RNASEL    | EG2 | 1 | 2 | 2 | 8 | 0,2913855570,799386187 | 9,97E-06 | 0,001562433 |
| 229838_at    | AI377271  | Hs.128686  | nucleobindin 2                                         | NUCB2     | EG2 | 3 | 0 | 3 | 7 | 0,2913855570,799386187 | 9,97E-06 | 0,001562433 |
| 230722_at    | AI377043  | Hs.435309  | basonuclin 2                                           | BNC2      | EG2 | 3 | 0 | 6 | 4 | 0,2913855570,799386187 | 9,97E-06 | 0,001562433 |
| 232060_at    | AK000776  |            |                                                        |           | EG2 | 2 | 1 | 2 | 8 | 0,2913855570,799386187 | 9,97E-06 | 0,001562433 |
| 235088_at    | AI276663  | Hs.380920  |                                                        | LOC201725 | EG2 | 3 | 0 | 5 | 5 | 0,2913855570,799386187 | 9,97E-06 | 0,001562433 |
| 235320_at    | AL138043  | Hs.373801  | ADP-ribosylation factor-like 6                         | ARL6      | EG2 | 2 | 1 | 7 | 3 | 0,2913855570,799386187 | 9,97E-06 | 0,001562433 |
| 239336_at    | BF109732  | Hs.164226  | thrombospondin 1                                       | THBS1     | EG2 | 1 | 2 | 4 | 6 | 0,2913855570,799386187 | 9,97E-06 | 0,001562433 |
| 1553962_s_at | BI668074  | Hs.502876  | ras homolog gene family, member B                      | RHOB      | EG2 | 2 | 1 | 6 | 3 | 0,2913855570,799386187 | 8,42E-05 | 0,002977773 |
| 1554250_s_at | BC033812  | Hs.511015, | H tripartite motif-containing 50B                      | TRIM50B   | EG2 | 1 | 2 | 2 | 7 | 0,2913855570,799386187 | 8,42E-05 | 0,002977773 |
| 1555870_at   | AK056658  | Hs.444729  | chromosome 1 open reading frame 188                    | C1orf188  | EG2 | 1 | 2 | 2 | 7 | 0,2913855570,799386187 | 8,42E-05 | 0,002977773 |
| 1555920_at   | BU683892  | Hs.381189  | chromobox homolog 3 (HP1 gamma homolog, Drosop         | CBX3      | EG2 | 1 | 2 | 5 | 4 | 0,2913855570,799386187 | 8,42E-05 | 0,002977773 |
| 1556641_at   | AK094547  | Hs.42834   |                                                        | FLJ37228  | EG2 | 0 | 3 | 0 | 9 | 0,2913855570,799386187 | 8,42E-05 | 0,002977773 |
| 1557905_s_at | AL552534  | Hs.502328  | CD44 antigen (homing function and Indian blood grou    | CD44      | EG2 | 1 | 2 | 5 | 4 | 0,2913855570,799386187 | 8,42E-05 | 0,002977773 |
| 1560296_at   | AV702787  | Hs.485616  | dystonin                                               | DST       | EG2 | 1 | 2 | 3 | 6 | 0,2913855570,799386187 | 8,42E-05 | 0,002977773 |
| 1567224_at   | U29113    | Hs.505924  | high mobility group AT-hook 2                          | HMGA2     | EG2 | 2 | 1 | 7 | 2 | 0,2913855570,799386187 | 8,42E-05 | 0,002977773 |
| 1568619_s_at | BC015343  | Hs.530899  |                                                        | LOC162073 | EG2 | 0 | 3 | 6 | 3 | 0,2913855570,799386187 | 8,42E-05 | 0,002977773 |
| 200766_at    | NM_001909 | Hs.121575, | H cathepsin D (lysosomal aspartyl peptidase)           | CTSD      | EG2 | 2 | 1 | 7 | 2 | 0,2913855570,799386187 | 8,42E-05 | 0,002977773 |

|             |           |              |                                                       |          |     |   |   |   |   |                        |          |             |
|-------------|-----------|--------------|-------------------------------------------------------|----------|-----|---|---|---|---|------------------------|----------|-------------|
| 201262_s_at | NM_001711 | Hs.821       | biglycan                                              | BGN      | EG2 | 1 | 2 | 5 | 4 | 0,2913855570,799386187 | 8,42E-05 | 0,002977773 |
| 201325_s_at | NM_001423 | Hs.436298    | epithelial membrane protein 1                         | EMP1     | EG2 | 3 | 0 | 5 | 4 | 0,2913855570,799386187 | 8,42E-05 | 0,002977773 |
| 201425_at   | NM_000690 | Hs.436437    | aldehyde dehydrogenase 2 family (mitochondrial)       | ALDH2    | EG2 | 0 | 3 | 5 | 4 | 0,2913855570,799386187 | 8,42E-05 | 0,002977773 |
| 201539_s_at | U29538    | Hs.435369    | four and a half LIM domains 1                         | FHL1     | EG2 | 1 | 2 | 1 | 8 | 0,2913855570,799386187 | 8,42E-05 | 0,002977773 |
| 201581_at   | BF572868  | Hs.169358    | thioredoxin domain containing 13                      | TXNDC13  | EG2 | 3 | 0 | 5 | 4 | 0,2913855570,799386187 | 8,42E-05 | 0,002977773 |
| 201818_at   | NM_024830 | Hs.368853    |                                                       | FLJ12443 | EG2 | 1 | 2 | 8 | 1 | 0,2913855570,799386187 | 8,42E-05 | 0,002977773 |
| 201869_s_at | BF593932  | Hs.495656    | transducin (beta)-like 1X-linked                      | TBL1X    | EG2 | 2 | 1 | 5 | 4 | 0,2913855570,799386187 | 8,42E-05 | 0,002977773 |
| 202341_s_at | AA149745  | Hs.435711    | tripartite motif-containing 2                         | TRIM2    | EG2 | 1 | 2 | 3 | 6 | 0,2913855570,799386187 | 8,42E-05 | 0,002977773 |
| 202382_s_at | NM_005471 | Hs.278500    | glucosamine-6-phosphate deaminase 1                   | GNPDA1   | EG2 | 1 | 2 | 6 | 3 | 0,2913855570,799386187 | 8,42E-05 | 0,002977773 |
| 203153_at   | NM_001548 | Hs.20315     | interferon-induced protein with tetratricopeptide rep | IFIT1    | EG2 | 1 | 2 | 5 | 4 | 0,2913855570,799386187 | 8,42E-05 | 0,002977773 |
| 203217_s_at | NM_003896 | Hs.415117    | ST3 beta-galactoside alpha-2,3-sialyltransferase 5    | ST3GAL5  | EG2 | 1 | 2 | 6 | 3 | 0,2913855570,799386187 | 8,42E-05 | 0,002977773 |
| 204084_s_at | AI911687  | Hs.30213     | ceroid-lipofuscinosis, neuronal 5                     | CLN5     | EG2 | 2 | 1 | 3 | 6 | 0,2913855570,799386187 | 8,42E-05 | 0,002977773 |
| 204137_at   | NM_003272 | Hs.498160    | transmembrane 7 superfamily member 1 (upregulate      | TM7SF1   | EG2 | 2 | 1 | 7 | 2 | 0,2913855570,799386187 | 8,42E-05 | 0,002977773 |
| 204140_at   | NM_003596 | Hs.421194    | tyrosylprotein sulfotransferase 1                     | TPST1    | EG2 | 2 | 1 | 4 | 5 | 0,2913855570,799386187 | 8,42E-05 | 0,002977773 |
| 204493_at   | NM_001196 | Hs.474150    | BH3 interacting domain death agonist                  | BID      | EG2 | 1 | 2 | 3 | 6 | 0,2913855570,799386187 | 8,42E-05 | 0,002977773 |
| 205407_at   | NM_021111 | Hs.388918    | reversion-inducing-cysteine-rich protein with kazal m | RECK     | EG2 | 1 | 2 | 2 | 7 | 0,2913855570,799386187 | 8,42E-05 | 0,002977773 |
| 205540_s_at | NM_016656 | Hs.50282     | Ras-related GTP binding B                             | RRAGB    | EG2 | 1 | 2 | 3 | 6 | 0,2913855570,799386187 | 8,42E-05 | 0,002977773 |
| 206777_s_at | NM_000496 | Hs.373074    | crystallin, beta B2                                   | CRYBB2   | EG2 | 0 | 3 | 8 | 1 | 0,2913855570,799386187 | 8,42E-05 | 0,002977773 |
| 206907_at   | NM_003811 | Hs.1524      | tumor necrosis factor (ligand) superfamily, member 9  | TNFSF9   | EG2 | 2 | 1 | 6 | 3 | 0,2913855570,799386187 | 8,42E-05 | 0,002977773 |
| 208230_s_at | NM_013960 | Hs.453951    | neuregulin 1                                          | NRG1     | EG2 | 2 | 1 | 9 | 0 | 0,2913855570,799386187 | 8,42E-05 | 0,002977773 |
| 209035_at   | M69148    | Hs.82045     | midkine (neurite growth-promoting factor 2)           | MDK      | EG2 | 0 | 3 | 1 | 8 | 0,2913855570,799386187 | 8,42E-05 | 0,002977773 |
| 209146_at   | AV704962  | Hs.105269    | sterol-C4-methyl oxidase-like                         | SC4MOL   | EG2 | 2 | 1 | 7 | 2 | 0,2913855570,799386187 | 8,42E-05 | 0,002977773 |
| 209277_at   | AL574096  | Hs.438231    | tissue factor pathway inhibitor 2                     | TFPI2    | EG2 | 2 | 1 | 4 | 5 | 0,2913855570,799386187 | 8,42E-05 | 0,002977773 |
| 209373_at   | BC003179  | Hs.185055    | mal, T-cell differentiation protein-like              | MALL     | EG2 | 2 | 1 | 5 | 4 | 0,2913855570,799386187 | 8,42E-05 | 0,002977773 |
| 209409_at   | D86962    | Hs.164060    | growth factor receptor-bound protein 10               | GRB10    | EG2 | 2 | 1 | 3 | 6 | 0,2913855570,799386187 | 8,42E-05 | 0,002977773 |
| 209537_at   | AF000416  | Hs.357637    | exostoses (multiple)-like 2                           | EXTL2    | EG2 | 3 | 0 | 9 | 0 | 0,2913855570,799386187 | 8,42E-05 | 0,002977773 |
| 209758_s_at | U37283    | Hs.512842    | microfibrillar associated protein 5                   | MFAP5    | EG2 | 0 | 3 | 3 | 6 | 0,2913855570,799386187 | 8,42E-05 | 0,002977773 |
| 210059_s_at | BC000433  | Hs.178695    | mitogen-activated protein kinase 13                   | MAPK13   | EG2 | 0 | 3 | 7 | 2 | 0,2913855570,799386187 | 8,42E-05 | 0,002977773 |
| 210732_s_at | AF342816  | Hs.4082      | lectin, galactoside-binding, soluble, 8 (galectin 8)  | LGALS8   | EG2 | 2 | 1 | 7 | 2 | 0,2913855570,799386187 | 8,42E-05 | 0,002977773 |
| 210916_s_at | AF098641  | Hs.502328    | CD44 antigen (homing function and Indian blood grou   | CD44     | EG2 | 2 | 1 | 6 | 3 | 0,2913855570,799386187 | 8,42E-05 | 0,002977773 |
| 211208_s_at | AB039327  | Hs.495984    | calcium/calmodulin-dependent serine protein kinase    | CASK     | EG2 | 2 | 1 | 1 | 8 | 0,2913855570,799386187 | 8,42E-05 | 0,002977773 |
| 211825_s_at | AF327066  | Hs.374477    | Ewing sarcoma breakpoint region 1                     | EWSR1    | EG2 | 3 | 0 | 5 | 4 | 0,2913855570,799386187 | 8,42E-05 | 0,002977773 |
| 211980_at   | AI922605  | Hs.17441     | collagen, type IV, alpha 1                            | COL4A1   | EG2 | 1 | 2 | 4 | 5 | 0,2913855570,799386187 | 8,42E-05 | 0,002977773 |
| 212959_s_at | AK001821  | Hs.46850     | N-acetylglucosamine-1-phosphate transferase, alpha    | GNPTAB   | EG2 | 2 | 1 | 8 | 1 | 0,2913855570,799386187 | 8,42E-05 | 0,002977773 |
| 213764_s_at | AW665892  | Hs.512842    | microfibrillar associated protein 5                   | MFAP5    | EG2 | 1 | 2 | 3 | 6 | 0,2913855570,799386187 | 8,42E-05 | 0,002977773 |
| 214250_at   | AI337584  | Hs.523873    | nuclear mitotic apparatus protein 1                   | NUMA1    | EG2 | 1 | 2 | 2 | 7 | 0,2913855570,799386187 | 8,42E-05 | 0,002977773 |
| 214505_s_at | AF220153  | Hs.435369    | four and a half LIM domains 1                         | FHL1     | EG2 | 1 | 2 | 1 | 8 | 0,2913855570,799386187 | 8,42E-05 | 0,002977773 |
| 214702_at   | AJ276395  | Hs.203717    | fibronectin 1                                         | FN1      | EG2 | 1 | 2 | 4 | 5 | 0,2913855570,799386187 | 8,42E-05 | 0,002977773 |
| 214723_x_at | AB046861  | Hs.503490, H | KIAA1641                                              | KIAA1641 | EG2 | 1 | 2 | 6 | 3 | 0,2913855570,799386187 | 8,42E-05 | 0,002977773 |
| 214927_at   | AL359052  | Hs.508597    | integrin, beta-like 1 (with EGF-like repeat domains)  | ITGBL1   | EG2 | 2 | 1 | 4 | 5 | 0,2913855570,799386187 | 8,42E-05 | 0,002977773 |
| 215775_at   | BF084105  | Hs.164226    | thrombospondin 1                                      | THBS1    | EG2 | 0 | 3 | 3 | 6 | 0,2913855570,799386187 | 8,42E-05 | 0,002977773 |
| 217785_s_at | NM_006555 | Hs.520794    |                                                       | YKT6     | EG2 | 2 | 1 | 6 | 3 | 0,2913855570,799386187 | 8,42E-05 | 0,002977773 |
| 218051_s_at | NM_022908 | Hs.84753     |                                                       | FLJ12442 | EG2 | 1 | 2 | 3 | 6 | 0,2913855570,799386187 | 8,42E-05 | 0,002977773 |
| 218934_s_at | NM_014424 | Hs.502612    | heat shock 27kDa protein family, member 7 (cardiovas  | HSPB7    | EG2 | 2 | 1 | 4 | 5 | 0,2913855570,799386187 | 8,42E-05 | 0,002977773 |
| 219501_at   | NM_017993 | Hs.128258    |                                                       | FLJ10094 | EG2 | 3 | 0 | 7 | 2 | 0,2913855570,799386187 | 8,42E-05 | 0,002977773 |

|             |           |           |                                                         |           |     |   |   |   |    |                        |          |             |
|-------------|-----------|-----------|---------------------------------------------------------|-----------|-----|---|---|---|----|------------------------|----------|-------------|
| 220615_s_at | NM_018099 | Hs.298851 | male sterility domain containing 1                      | MLSTD1    | EG2 | 1 | 2 | 1 | 8  | 0,2913855570,799386187 | 8,42E-05 | 0,002977773 |
| 221142_s_at | NM_018441 | Hs.281680 | peroxisomal trans-2-enoyl-CoA reductase                 | PECR      | EG2 | 0 | 3 | 2 | 7  | 0,2913855570,799386187 | 8,42E-05 | 0,002977773 |
| 221882_s_at | AI636233  | Hs.288940 | transmembrane protein 8 (five membrane-spanning d       | TMEM8     | EG2 | 0 | 3 | 4 | 5  | 0,2913855570,799386187 | 8,42E-05 | 0,002977773 |
| 223271_s_at | AF161543  | Hs.497967 | CTD (carboxy-terminal domain, RNA polymerase II, po     | CTDSPL2   | EG2 | 3 | 0 | 4 | 5  | 0,2913855570,799386187 | 8,42E-05 | 0,002977773 |
| 223287_s_at | AF146696  | Hs.431498 | forkhead box P1                                         | FOXP1     | EG2 | 0 | 3 | 4 | 5  | 0,2913855570,799386187 | 8,42E-05 | 0,002977773 |
| 223374_s_at | AF154848  | Hs.418062 | UDP-Gal:betaGlcNAc beta 1,3-galactosyltransferase, p    | B3GALT3   | EG2 | 2 | 1 | 6 | 3  | 0,2913855570,799386187 | 8,42E-05 | 0,002977773 |
| 223395_at   | AB056106  | Hs.477015 | ABI gene family, member 3 (NESH) binding protein        | ABI3BP    | EG2 | 0 | 3 | 7 | 2  | 0,2913855570,799386187 | 8,42E-05 | 0,002977773 |
| 224755_at   | BE621524  | Hs.500674 |                                                         | SMBP      | EG2 | 3 | 0 | 4 | 5  | 0,2913855570,799386187 | 8,42E-05 | 0,002977773 |
| 225140_at   | BF438116  | Hs.298658 | Kruppel-like factor 3 (basic)                           | KLF3      | EG2 | 2 | 1 | 8 | 1  | 0,2913855570,799386187 | 8,42E-05 | 0,002977773 |
| 225579_at   | AL516202  | Hs.274415 | PQ loop repeat containing 3                             | PQLC3     | EG2 | 0 | 3 | 4 | 5  | 0,2913855570,799386187 | 8,42E-05 | 0,002977773 |
| 225640_at   | AA875998  | Hs.446271 |                                                         | LOC401504 | EG2 | 1 | 2 | 6 | 3  | 0,2913855570,799386187 | 8,42E-05 | 0,002977773 |
| 225742_at   | W93501    | Hs.497492 | Mdm4, transformed 3T3 cell double minute 4, p53 bin     | MDM4      | EG2 | 2 | 1 | 5 | 4  | 0,2913855570,799386187 | 8,42E-05 | 0,002977773 |
| 225871_at   | BF680588  | Hs.489051 | six transmembrane epithelial antigen of the prostate    | STEAP2    | EG2 | 1 | 2 | 7 | 2  | 0,2913855570,799386187 | 8,42E-05 | 0,002977773 |
| 226534_at   | AI446414  | Hs.1048   | KIT ligand                                              | KITLG     | EG2 | 2 | 1 | 4 | 5  | 0,2913855570,799386187 | 8,42E-05 | 0,002977773 |
| 226908_at   | AI627704  | Hs.253736 | leucine-rich repeats and immunoglobulin-like domain     | LRIG3     | EG2 | 2 | 1 | 3 | 6  | 0,2913855570,799386187 | 8,42E-05 | 0,002977773 |
| 226912_at   | AW003367  | Hs.21902  | zinc finger, DHHC-type containing 23                    | ZDHHC23   | EG2 | 2 | 1 | 7 | 2  | 0,2913855570,799386187 | 8,42E-05 | 0,002977773 |
| 227408_s_at | AW008976  | Hs.369091 | sorting nexin 25                                        | SNX25     | EG2 | 3 | 0 | 4 | 5  | 0,2913855570,799386187 | 8,42E-05 | 0,002977773 |
| 227525_at   | AA058770  | Hs.131673 | glucocorticoid induced transcript 1                     | GLCCI1    | EG2 | 3 | 0 | 2 | 7  | 0,2913855570,799386187 | 8,42E-05 | 0,002977773 |
| 228314_at   | BE877357  |           |                                                         |           | EG2 | 3 | 0 | 5 | 4  | 0,2913855570,799386187 | 8,42E-05 | 0,002977773 |
| 228613_at   | BF183535  | Hs.531642 | RAB11 family interacting protein 3 (class II)           | RAB11FIP3 | EG2 | 3 | 0 | 5 | 4  | 0,2913855570,799386187 | 8,42E-05 | 0,002977773 |
| 229010_at   | AI807026  | Hs.504096 | Cas-Br-M (murine) ecotropic retroviral transforming s   | CBL       | EG2 | 2 | 1 | 2 | 7  | 0,2913855570,799386187 | 8,42E-05 | 0,002977773 |
| 229512_at   | BE464337  |           |                                                         |           | EG2 | 2 | 1 | 3 | 6  | 0,2913855570,799386187 | 8,42E-05 | 0,002977773 |
| 230000_at   | AI523817  | Hs.195642 | chromosome 17 open reading frame 27                     | C17orf27  | EG2 | 1 | 2 | 4 | 5  | 0,2913855570,799386187 | 8,42E-05 | 0,002977773 |
| 230165_at   | N31731    | Hs.44269  | shugoshin-like 2 (S. pombe)                             | SGOL2     | EG2 | 2 | 1 | 4 | 5  | 0,2913855570,799386187 | 8,42E-05 | 0,002977773 |
| 230424_at   | AU144860  | Hs.483067 | chromosome 5 open reading frame 13                      | C5orf13   | EG2 | 0 | 3 | 6 | 3  | 0,2913855570,799386187 | 8,42E-05 | 0,002977773 |
| 234863_x_at | AK026197  | Hs.520506 | F-box protein 5                                         | FBXO5     | EG2 | 2 | 1 | 6 | 3  | 0,2913855570,799386187 | 8,42E-05 | 0,002977773 |
| 235147_at   | R56118    | Hs.528187 |                                                         | LOC440928 | EG2 | 2 | 1 | 7 | 2  | 0,2913855570,799386187 | 8,42E-05 | 0,002977773 |
| 235287_at   | AW192700  | Hs.119882 | cyclin-dependent kinase 6                               | CDK6      | EG2 | 1 | 2 | 3 | 6  | 0,2913855570,799386187 | 8,42E-05 | 0,002977773 |
| 235746_s_at | BE048919  | Hs.410477 | phospholipase A2 receptor 1, 180kDa                     | PLA2R1    | EG2 | 0 | 3 | 2 | 7  | 0,2913855570,799386187 | 8,42E-05 | 0,002977773 |
| 238722_x_at | AI460037  | Hs.324271 |                                                         | NAPE-PLD  | EG2 | 1 | 2 | 3 | 6  | 0,2913855570,799386187 | 8,42E-05 | 0,002977773 |
| 241893_at   | BE927766  |           |                                                         |           | EG2 | 2 | 1 | 3 | 6  | 0,2913855570,799386187 | 8,42E-05 | 0,002977773 |
| 243507_s_at | AV715251  | Hs.529340 |                                                         | FLJ25067  | EG2 | 2 | 1 | 2 | 7  | 0,2913855570,799386187 | 8,42E-05 | 0,002977773 |
| 243982_at   | AA455180  | Hs.174682 | BTB (POZ) domain containing 5                           | BTBD5     | EG2 | 2 | 1 | 7 | 2  | 0,2913855570,799386187 | 8,42E-05 | 0,002977773 |
| 244669_at   | T16443    | Hs.292457 |                                                         | LOC441164 | EG2 | 3 | 0 | 2 | 7  | 0,2913855570,799386187 | 8,42E-05 | 0,002977773 |
| 212677_s_at | BG530481  | Hs.310645 | RAB1A, member RAS oncogene family                       | RAB1A     | EG2 | 0 | 2 | 4 | 10 | 0,5783259580,896050827 | 2,17E-10 | 0,001562433 |
| 209217_s_at | BC000464  | Hs.156701 | WD repeat domain 45                                     | WDR45     | EG2 | 1 | 1 | 8 | 5  | 0,5783259580,896050827 | 4,56E-09 | 0,001562433 |
| 227140_at   | AI343467  | Hs.28792  | inhibin, beta A (activin A, activin AB alpha polypeptid | INHBA     | EG2 | 1 | 1 | 9 | 4  | 0,5783259580,896050827 | 4,56E-09 | 0,001562433 |
| 202625_at   | AI356412  | Hs.491767 | v-yes-1 Yamaguchi sarcoma viral related oncogene ho     | LYN       | EG2 | 2 | 0 | 6 | 6  | 0,5783259580,896050827 | 7,43E-08 | 0,001562433 |
| 205463_s_at | NM_002607 | Hs.376032 | H platelet-derived growth factor alpha polypeptide      | PDGFA     | EG2 | 1 | 1 | 2 | 10 | 0,5783259580,896050827 | 7,43E-08 | 0,001562433 |
| 1557242_at  | AI769729  | Hs.130838 |                                                         | LOC285835 | EG2 | 1 | 1 | 7 | 4  | 0,5783259580,896050827 | 9,59E-07 | 0,001562433 |
| 201578_at   | NM_005397 | Hs.16426  | podocalyxin-like                                        | PODXL     | EG2 | 0 | 2 | 6 | 5  | 0,5783259580,896050827 | 9,59E-07 | 0,001562433 |
| 202975_s_at | N21138    | Hs.445030 | Rho-related BTB domain containing 3                     | RHOBTB3   | EG2 | 1 | 1 | 7 | 4  | 0,5783259580,896050827 | 9,59E-07 | 0,001562433 |
| 204797_s_at | NM_004434 | Hs.12451  | echinoderm microtubule associated protein like 1        | EML1      | EG2 | 2 | 0 | 5 | 6  | 0,5783259580,896050827 | 9,59E-07 | 0,001562433 |
| 205634_x_at | NM_024298 | Hs.467279 | leukocyte receptor cluster (LRC) member 4               | LENG4     | EG2 | 1 | 1 | 8 | 3  | 0,5783259580,896050827 | 9,59E-07 | 0,001562433 |
| 206059_at   | NM_003430 | Hs.531632 | zinc finger protein 91 (HPF7, HTF10)                    | ZNF91     | EG2 | 2 | 0 | 7 | 4  | 0,5783259580,896050827 | 9,59E-07 | 0,001562433 |

|              |           |            |                                                          |               |     |   |   |   |    |                        |          |             |
|--------------|-----------|------------|----------------------------------------------------------|---------------|-----|---|---|---|----|------------------------|----------|-------------|
| 209940_at    | AF083068  | Hs.271742  | poly (ADP-ribose) polymerase family, member 3            | PARP3         | EG2 | 0 | 2 | 4 | 7  | 0,5783259580,896050827 | 9,59E-07 | 0,001562433 |
| 213260_at    | AU145890  | Hs.348883  | forkhead box C1                                          | FOXC1         | EG2 | 2 | 0 | 1 | 10 | 0,5783259580,896050827 | 9,59E-07 | 0,001562433 |
| 213572_s_at  | AI554300  | Hs.381167  | serpin peptidase inhibitor, clade B (ovalbumin), mem     | SERPINB1      | EG2 | 0 | 2 | 5 | 6  | 0,5783259580,896050827 | 9,59E-07 | 0,001562433 |
| 219210_s_at  | NM_016530 | Hs.389733  | RAB8B, member RAS oncogene family                        | RAB8B         | EG2 | 2 | 0 | 9 | 2  | 0,5783259580,896050827 | 9,59E-07 | 0,001562433 |
| 238478_at    | H97386    | Hs.435309  | basonuclin 2                                             | BNC2          | EG2 | 2 | 0 | 5 | 6  | 0,5783259580,896050827 | 9,59E-07 | 0,001562433 |
| 1554097_a_at | BC021861  | Hs.458096  |                                                          | LOC554202     | EG2 | 1 | 1 | 6 | 4  | 0,5783259580,896050827 | 9,97E-06 | 0,001562433 |
| 201538_s_at  | NM_004090 | Hs.181046  | dual specificity phosphatase 3 (vaccinia virus phospho   | DUSP3         | EG2 | 1 | 1 | 9 | 1  | 0,5783259580,896050827 | 9,97E-06 | 0,001562433 |
| 202037_s_at  | NM_003012 | Hs.213424  | secreted frizzled-related protein 1                      | SFRP1         | EG2 | 1 | 1 | 7 | 3  | 0,5783259580,896050827 | 9,97E-06 | 0,001562433 |
| 202510_s_at  | NM_006291 | Hs.525607  | tumor necrosis factor, alpha-induced protein 2           | TNFAIP2       | EG2 | 0 | 2 | 5 | 5  | 0,5783259580,896050827 | 9,97E-06 | 0,001562433 |
| 202627_s_at  | AL574210  | Hs.414795  | serpin peptidase inhibitor, clade E (nexin, plasminoge   | SERPINE1      | EG2 | 2 | 0 | 7 | 3  | 0,5783259580,896050827 | 9,97E-06 | 0,001562433 |
| 203385_at    | NM_001345 | Hs.524488  | diacylglycerol kinase, alpha 80kDa                       | DGKA          | EG2 | 0 | 2 | 3 | 7  | 0,5783259580,896050827 | 9,97E-06 | 0,001562433 |
| 203504_s_at  | NM_005502 | Hs.429294  | ATP-binding cassette, sub-family A (ABC1), member 1      | ABCA1         | EG2 | 1 | 1 | 3 | 7  | 0,5783259580,896050827 | 9,97E-06 | 0,001562433 |
| 203579_s_at  | AI660619  | Hs.334848  | solute carrier family 7, member 6 opposite strand        | SLC7A6OS      | EG2 | 1 | 1 | 5 | 5  | 0,5783259580,896050827 | 9,97E-06 | 0,001562433 |
| 203741_s_at  | NM_001114 | Hs.513578  | adenylate cyclase 7                                      | ADCY7         | EG2 | 0 | 2 | 4 | 6  | 0,5783259580,896050827 | 9,97E-06 | 0,001562433 |
| 203951_at    | NM_001299 | Hs.465929  | calponin 1, basic, smooth muscle                         | CNN1          | EG2 | 1 | 1 | 2 | 8  | 0,5783259580,896050827 | 9,97E-06 | 0,001562433 |
| 204925_at    | NM_004937 | Hs.187667  | cystinosis, nephropathic                                 | CTNS          | EG2 | 0 | 2 | 7 | 3  | 0,5783259580,896050827 | 9,97E-06 | 0,001562433 |
| 206396_at    | NM_004170 | Hs.444915  | solute carrier family 1 (neuronal/epithelial high affini | SLC1A1        | EG2 | 1 | 1 | 7 | 3  | 0,5783259580,896050827 | 9,97E-06 | 0,001562433 |
| 218000_s_at  | NM_007350 | Hs.484885  | pleckstrin homology-like domain, family A, member 1      | PHLDA1        | EG2 | 2 | 0 | 9 | 1  | 0,5783259580,896050827 | 9,97E-06 | 0,001562433 |
| 221577_x_at  | AF003934  | Hs.515258  | growth differentiation factor 15                         | GDF15         | EG2 | 2 | 0 | 9 | 1  | 0,5783259580,896050827 | 9,97E-06 | 0,001562433 |
| 222719_s_at  | AB033831  | Hs.148162  | platelet derived growth factor C                         | PDGFC         | EG2 | 2 | 0 | 8 | 2  | 0,5783259580,896050827 | 9,97E-06 | 0,001562433 |
| 223734_at    | AF329088  | Hs.154140  |                                                          | OSAP          | EG2 | 1 | 1 | 4 | 6  | 0,5783259580,896050827 | 9,97E-06 | 0,001562433 |
| 223789_s_at  | AF116627  | Hs.485449  | GTP binding protein 2                                    | GTPBP2        | EG2 | 1 | 1 | 5 | 5  | 0,5783259580,896050827 | 9,97E-06 | 0,001562433 |
| 224942_at    | BG434272  | Hs.494928  | pregnancy-associated plasma protein A, pappalysin 1      | PAPPA         | EG2 | 2 | 0 | 7 | 3  | 0,5783259580,896050827 | 9,97E-06 | 0,001562433 |
| 224964_s_at  | AK026424  | Hs.187772  | guanine nucleotide binding protein (G protein), gam      | GNG2          | EG2 | 2 | 0 | 5 | 5  | 0,5783259580,896050827 | 9,97E-06 | 0,001562433 |
| 226278_at    | AI150224  | Hs.349096  |                                                          | DKFZp313A2432 | EG2 | 0 | 2 | 4 | 6  | 0,5783259580,896050827 | 9,97E-06 | 0,001562433 |
| 226810_at    | BE500942  | Hs.368337  | chromosome 6 open reading frame 155                      | C6orf155      | EG2 | 2 | 0 | 8 | 2  | 0,5783259580,896050827 | 9,97E-06 | 0,001562433 |
| 227396_at    | AI631833  |            |                                                          |               | EG2 | 2 | 0 | 7 | 3  | 0,5783259580,896050827 | 9,97E-06 | 0,001562433 |
| 229011_at    | AA150501  |            |                                                          |               | EG2 | 2 | 0 | 6 | 4  | 0,5783259580,896050827 | 9,97E-06 | 0,001562433 |
| 231067_s_at  | BF114967  | Hs.371240  | A kinase (PRKA) anchor protein (gravin) 12               | AKAP12        | EG2 | 1 | 1 | 4 | 6  | 0,5783259580,896050827 | 9,97E-06 | 0,001562433 |
| 232790_at    | AI744580  |            |                                                          |               | EG2 | 1 | 1 | 3 | 7  | 0,5783259580,896050827 | 9,97E-06 | 0,001562433 |
| 235311_at    | BG110260  | Hs.390838  | FK506 binding protein 14, 22 kDa                         | FKBP14        | EG2 | 2 | 0 | 8 | 2  | 0,5783259580,896050827 | 9,97E-06 | 0,001562433 |
| 1557080_s_at | AI753143  | Hs.508597  | integrin, beta-like 1 (with EGF-like repeat domains)     | ITGBL1        | EG2 | 1 | 1 | 3 | 6  | 0,5783259580,896050827 | 8,42E-05 | 0,002977773 |
| 201185_at    | NM_002775 | Hs.501280  | HtrA serine peptidase 1                                  | HTRA1         | EG2 | 0 | 2 | 5 | 4  | 0,5783259580,896050827 | 8,42E-05 | 0,002977773 |
| 201615_x_at  | AI685060  | Hs.490203  | caldesmon 1                                              | CALD1         | EG2 | 2 | 0 | 3 | 6  | 0,5783259580,896050827 | 8,42E-05 | 0,002977773 |
| 201668_x_at  | AW163148  | Hs.519909  | myristoylated alanine-rich protein kinase C substrate    | MARCKS        | EG2 | 0 | 2 | 3 | 6  | 0,5783259580,896050827 | 8,42E-05 | 0,002977773 |
| 202948_at    | NM_000877 | Hs.516249  | interleukin 1 receptor, type I                           | IL1R1         | EG2 | 0 | 2 | 2 | 7  | 0,5783259580,896050827 | 8,42E-05 | 0,002977773 |
| 203354_s_at  | AW117368  | Hs.434255  | pleckstrin and Sec7 domain containing 3                  | PSD3          | EG2 | 2 | 0 | 2 | 7  | 0,5783259580,896050827 | 8,42E-05 | 0,002977773 |
| 203424_s_at  | AW157548  | Hs.369982, | H insulin-like growth factor binding protein 5           | IGFBP5        | EG2 | 2 | 0 | 3 | 6  | 0,5783259580,896050827 | 8,42E-05 | 0,002977773 |
| 203827_at    | NM_017983 | Hs.463964  |                                                          | WIPI49        | EG2 | 0 | 2 | 6 | 3  | 0,5783259580,896050827 | 8,42E-05 | 0,002977773 |
| 203879_at    | U86453    | Hs.518451  | phosphoinositide-3-kinase, catalytic, delta polypeptid   | PIK3CD        | EG2 | 0 | 2 | 3 | 6  | 0,5783259580,896050827 | 8,42E-05 | 0,002977773 |
| 204807_at    | BF224146  | Hs.216386  | transmembrane protein 5                                  | TMEM5         | EG2 | 1 | 1 | 3 | 6  | 0,5783259580,896050827 | 8,42E-05 | 0,002977773 |
| 204979_s_at  | NM_007341 | Hs.473847  | SH3 domain binding glutamic acid-rich protein            | SH3BGR        | EG2 | 1 | 1 | 8 | 1  | 0,5783259580,896050827 | 8,42E-05 | 0,002977773 |
| 205234_at    | NM_004696 | Hs.351306  | solute carrier family 16 (monocarboxylic acid transpor   | SLC16A4       | EG2 | 0 | 2 | 4 | 5  | 0,5783259580,896050827 | 8,42E-05 | 0,002977773 |
| 205741_s_at  | NM_001392 | Hs.58919   | dystrobrevin, alpha                                      | DTNA          | EG2 | 2 | 0 | 5 | 4  | 0,5783259580,896050827 | 8,42E-05 | 0,002977773 |
| 205925_s_at  | NM_002867 | Hs.123072  | RAB3B, member RAS oncogene family                        | RAB3B         | EG2 | 2 | 0 | 6 | 3  | 0,5783259580,896050827 | 8,42E-05 | 0,002977773 |

|             |           |              |                                                         |           |     |   |   |   |   |                        |          |             |
|-------------|-----------|--------------|---------------------------------------------------------|-----------|-----|---|---|---|---|------------------------|----------|-------------|
| 207264_at   | NM_016657 | Hs.554798    | KDEL (Lys-Asp-Glu-Leu) endoplasmic reticulum protei     | KDELR3    | EG2 | 2 | 0 | 5 | 4 | 0,5783259580,896050827 | 8,42E-05 | 0,002977773 |
| 208107_s_at | NM_030941 | Hs.177926    |                                                         | LOC81691  | EG2 | 1 | 1 | 5 | 4 | 0,5783259580,896050827 | 8,42E-05 | 0,002977773 |
| 208191_x_at | NM_002780 | Hs.466860    | pregnancy specific beta-1-glycoprotein 4                | PSG4      | EG2 | 0 | 2 | 6 | 3 | 0,5783259580,896050827 | 8,42E-05 | 0,002977773 |
| 209216_at   | BC000464  | Hs.156701    | WD repeat domain 45                                     | WDR45     | EG2 | 0 | 2 | 3 | 6 | 0,5783259580,896050827 | 8,42E-05 | 0,002977773 |
| 211340_s_at | M28882    | Hs.511397    | melanoma cell adhesion molecule                         | MCAM      | EG2 | 0 | 2 | 2 | 7 | 0,5783259580,896050827 | 8,42E-05 | 0,002977773 |
| 211713_x_at | BC005832  | Hs.81892     | KIAA0101                                                | KIAA0101  | EG2 | 2 | 0 | 3 | 6 | 0,5783259580,896050827 | 8,42E-05 | 0,002977773 |
| 212386_at   | BF592782  | Hs.200285    | transcription factor 4                                  | TCF4      | EG2 | 1 | 1 | 4 | 5 | 0,5783259580,896050827 | 8,42E-05 | 0,002977773 |
| 213206_at   | AW149492  | Hs.463278    | golgi SNAP receptor complex member 2                    | GOSR2     | EG2 | 0 | 2 | 3 | 6 | 0,5783259580,896050827 | 8,42E-05 | 0,002977773 |
| 213765_at   | AW665892  | Hs.512842    | microfibrillar associated protein 5                     | MFAP5     | EG2 | 0 | 2 | 3 | 6 | 0,5783259580,896050827 | 8,42E-05 | 0,002977773 |
| 213959_s_at | BF515597  | Hs.298382    |                                                         | KIAA1005  | EG2 | 2 | 0 | 5 | 4 | 0,5783259580,896050827 | 8,42E-05 | 0,002977773 |
| 214151_s_at | AU144243  | Hs.126115    | phosphatidylinositol glycan, class B                    | PIGB      | EG2 | 2 | 0 | 5 | 4 | 0,5783259580,896050827 | 8,42E-05 | 0,002977773 |
| 214581_x_at | BE568134  | Hs.443577    | tumor necrosis factor receptor superfamily, member 2    | TNFRSF21  | EG2 | 2 | 0 | 4 | 5 | 0,5783259580,896050827 | 8,42E-05 | 0,002977773 |
| 214724_at   | AF070621  | Hs.116796    | DIX domain containing 1                                 | DIXDC1    | EG2 | 1 | 1 | 3 | 6 | 0,5783259580,896050827 | 8,42E-05 | 0,002977773 |
| 217502_at   | BE888744  | Hs.437609    | interferon-induced protein with tetratricopeptide rep   | IFIT2     | EG2 | 2 | 0 | 5 | 4 | 0,5783259580,896050827 | 8,42E-05 | 0,002977773 |
| 218284_at   | NM_015400 | Hs.36915, Hs | SMAD, mothers against DPP homolog 3 (Drosophila)        | SMAD3     | EG2 | 0 | 2 | 4 | 5 | 0,5783259580,896050827 | 8,42E-05 | 0,002977773 |
| 218665_at   | NM_012193 | Hs.19545     | frizzled homolog 4 (Drosophila)                         | FZD4      | EG2 | 0 | 2 | 3 | 6 | 0,5783259580,896050827 | 8,42E-05 | 0,002977773 |
| 218986_s_at | NM_017631 | Hs.481141    |                                                         | FLJ20035  | EG2 | 0 | 2 | 2 | 7 | 0,5783259580,896050827 | 8,42E-05 | 0,002977773 |
| 219703_at   | NM_018365 | Hs.444483    | meiosis-specific nuclear structural 1                   | MNS1      | EG2 | 2 | 0 | 4 | 5 | 0,5783259580,896050827 | 8,42E-05 | 0,002977773 |
| 221012_s_at | NM_030912 | Hs.336810    | tripartite motif-containing 8                           | TRIM8     | EG2 | 0 | 2 | 4 | 5 | 0,5783259580,896050827 | 8,42E-05 | 0,002977773 |
| 221139_s_at | NM_015989 | Hs.279815    | cysteine sulfinic acid decarboxylase                    | CSAD      | EG2 | 0 | 2 | 4 | 5 | 0,5783259580,896050827 | 8,42E-05 | 0,002977773 |
| 221489_s_at | W48843    | Hs.323308    | sprouty homolog 4 (Drosophila)                          | SPRY4     | EG2 | 1 | 1 | 7 | 2 | 0,5783259580,896050827 | 8,42E-05 | 0,002977773 |
| 222020_s_at | AW117456  | Hs.504352    |                                                         | HNT       | EG2 | 1 | 1 | 6 | 3 | 0,5783259580,896050827 | 8,42E-05 | 0,002977773 |
| 222621_at   | BF591419  | Hs.499000    | DnaJ (Hsp40) homolog, subfamily C, member 1             | DNAJC1    | EG2 | 0 | 2 | 9 | 0 | 0,5783259580,896050827 | 8,42E-05 | 0,002977773 |
| 222802_at   | J05008    |              |                                                         |           | EG2 | 2 | 0 | 3 | 6 | 0,5783259580,896050827 | 8,42E-05 | 0,002977773 |
| 224839_s_at | BG328998  | Hs.460693    | glutamic pyruvate transaminase (alanine aminotransf     | GPT2      | EG2 | 0 | 2 | 6 | 3 | 0,5783259580,896050827 | 8,42E-05 | 0,002977773 |
| 224959_at   | AI718385  | Hs.302738    | solute carrier family 26 (sulfate transporter), member  | SLC26A2   | EG2 | 2 | 0 | 5 | 4 | 0,5783259580,896050827 | 8,42E-05 | 0,002977773 |
| 225411_at   | AI769794  | Hs.469690    |                                                         | FLJ14681  | EG2 | 1 | 1 | 3 | 6 | 0,5783259580,896050827 | 8,42E-05 | 0,002977773 |
| 225571_at   | AA701657  | Hs.133421    | leukemia inhibitory factor receptor                     | LIFR      | EG2 | 0 | 2 | 2 | 7 | 0,5783259580,896050827 | 8,42E-05 | 0,002977773 |
| 226833_at   | AI921877  | Hs.27475     |                                                         | FLJ32499  | EG2 | 2 | 0 | 7 | 2 | 0,5783259580,896050827 | 8,42E-05 | 0,002977773 |
| 227037_at   | AA029500  | Hs.31652     |                                                         | LOC201164 | EG2 | 1 | 1 | 5 | 4 | 0,5783259580,896050827 | 8,42E-05 | 0,002977773 |
| 227070_at   | W63754    | Hs.159993    | glycosyltransferase 8 domain containing 2               | GLT8D2    | EG2 | 0 | 2 | 5 | 4 | 0,5783259580,896050827 | 8,42E-05 | 0,002977773 |
| 227347_x_at | NM_021170 | Hs.154029    | hairy and enhancer of split 4 (Drosophila)              | HES4      | EG2 | 1 | 1 | 3 | 6 | 0,5783259580,896050827 | 8,42E-05 | 0,002977773 |
| 227657_at   | AA722069  | Hs.480825    | ring finger protein 150                                 | RNF150    | EG2 | 0 | 2 | 1 | 8 | 0,5783259580,896050827 | 8,42E-05 | 0,002977773 |
| 227897_at   | N20927    | Hs.98643     | RAP2B, member of RAS oncogene family                    | RAP2B     | EG2 | 1 | 1 | 5 | 4 | 0,5783259580,896050827 | 8,42E-05 | 0,002977773 |
| 228946_at   | AW150229  | Hs.391481    | PDZ domain containing 6                                 | PDZK6     | EG2 | 2 | 0 | 3 | 6 | 0,5783259580,896050827 | 8,42E-05 | 0,002977773 |
| 228998_at   | AV693653  | Hs.372082    | trinucleotide repeat containing 6B                      | TNRC6B    | EG2 | 0 | 2 | 2 | 7 | 0,5783259580,896050827 | 8,42E-05 | 0,002977773 |
| 229893_at   | BF589413  | Hs.127535    | FERM domain containing 3                                | FRMD3     | EG2 | 1 | 1 | 6 | 3 | 0,5783259580,896050827 | 8,42E-05 | 0,002977773 |
| 230425_at   | AI674183  | Hs.116092    | EPH receptor B1                                         | EPHB1     | EG2 | 0 | 2 | 8 | 1 | 0,5783259580,896050827 | 8,42E-05 | 0,002977773 |
| 230559_x_at | AI277617  | Hs.117835    | FYVE, RhoGEF and PH domain containing 4                 | FGD4      | EG2 | 0 | 2 | 0 | 9 | 0,5783259580,896050827 | 8,42E-05 | 0,002977773 |
| 230645_at   | BF110588  | Hs.127535    | FERM domain containing 3                                | FRMD3     | EG2 | 1 | 1 | 6 | 3 | 0,5783259580,896050827 | 8,42E-05 | 0,002977773 |
| 231904_at   | AU122448  | Hs.365116    | U2(RNU2) small nuclear RNA auxiliary factor 1           | U2AF1     | EG2 | 1 | 1 | 9 | 0 | 0,5783259580,896050827 | 8,42E-05 | 0,002977773 |
| 235202_x_at | BG498328  | Hs.252543    |                                                         | IKIP      | EG2 | 2 | 0 | 7 | 2 | 0,5783259580,896050827 | 8,42E-05 | 0,002977773 |
| 235706_at   | AW663908  | Hs.334873    | carboxypeptidase M                                      | CPM       | EG2 | 1 | 1 | 0 | 9 | 0,5783259580,896050827 | 8,42E-05 | 0,002977773 |
| 238841_at   | AA651920  | Hs.437943    | protein tyrosine phosphatase domain containing 1        | PTPDC1    | EG2 | 1 | 1 | 8 | 1 | 0,5783259580,896050827 | 8,42E-05 | 0,002977773 |
| 239761_at   | AI088120  | Hs.521568    | glucosaminyl (N-acetyl) transferase 1, core 2 (beta-1,6 | GCNT1     | EG2 | 2 | 0 | 5 | 4 | 0,5783259580,896050827 | 8,42E-05 | 0,002977773 |

|              |           |                      |                                                          |              |     |   |   |    |    |                        |          |             |
|--------------|-----------|----------------------|----------------------------------------------------------|--------------|-----|---|---|----|----|------------------------|----------|-------------|
| 242343_x_at  | H57111    | Hs.147895            | zinc finger protein 518                                  | ZNF518       | EG2 | 0 | 2 | 8  | 1  | 0,5783259580,896050827 | 8,42E-05 | 0,002977773 |
| 1555812_a_at | AF498927  | Hs.504877            | Rho GDP dissociation inhibitor (GDI) beta                | ARHGDI3      | EG2 | 0 | 1 | 3  | 9  | 0,8651132690,896050827 | 7,43E-08 | 0,001562433 |
| 200743_s_at  | NM_000391 | Hs.523454            | tripeptidyl peptidase I                                  | TPP1         | EG2 | 0 | 1 | 10 | 2  | 0,8651132690,896050827 | 7,43E-08 | 0,001562433 |
| 227529_s_at  | BF511276  | Hs.371240            | A kinase (PRKA) anchor protein (gravin) 12               | AKAP12       | EG2 | 1 | 0 | 5  | 7  | 0,8651132690,896050827 | 7,43E-08 | 0,001562433 |
| 203571_s_at  | NM_006829 | Hs.74120             | chromosome 10 open reading frame 116                     | C10orf116    | EG2 | 0 | 1 | 5  | 6  | 0,8651132690,896050827 | 9,59E-07 | 0,001562433 |
| 204484_at    | NM_002646 | Hs.497487            | phosphoinositide-3-kinase, class 2, beta polypeptide     | PIK3C2B      | EG2 | 0 | 1 | 4  | 7  | 0,8651132690,896050827 | 9,59E-07 | 0,001562433 |
| 227611_at    | AA442856  | Hs.6918              | threonyl-tRNA synthetase-like 2                          | TARSL2       | EG2 | 0 | 1 | 5  | 6  | 0,8651132690,896050827 | 9,59E-07 | 0,001562433 |
| 228128_x_at  | AI110886  | Hs.494928            | pregnancy-associated plasma protein A, pappalysin 1      | PAPPA        | EG2 | 1 | 0 | 8  | 3  | 0,8651132690,896050827 | 9,59E-07 | 0,001562433 |
| 229638_at    | AI681917  | Hs.499205            | iroquois homeobox protein 3                              | IRX3         | EG2 | 1 | 0 | 4  | 7  | 0,8651132690,896050827 | 9,59E-07 | 0,001562433 |
| 201981_at    | AA148534  | Hs.494928            | pregnancy-associated plasma protein A, pappalysin 1      | PAPPA        | EG2 | 1 | 0 | 8  | 2  | 0,8651132690,896050827 | 9,97E-06 | 0,001562433 |
| 202036_s_at  | AF017987  | Hs.213424            | secreted frizzled-related protein 1                      | SFRP1        | EG2 | 0 | 1 | 7  | 3  | 0,8651132690,896050827 | 9,97E-06 | 0,001562433 |
| 206172_at    | NM_000640 | Hs.336046            | interleukin 13 receptor, alpha 2                         | IL13RA2      | EG2 | 1 | 0 | 7  | 3  | 0,8651132690,896050827 | 9,97E-06 | 0,001562433 |
| 206371_at    | NM_000804 | Hs.352               | folate receptor 3 (gamma)                                | FOLR3        | EG2 | 0 | 1 | 7  | 3  | 0,8651132690,896050827 | 9,97E-06 | 0,001562433 |
| 209460_at    | AF237813  | Hs.336768            | 4-aminobutyrate aminotransferase                         | ABAT         | EG2 | 1 | 0 | 6  | 4  | 0,8651132690,896050827 | 9,97E-06 | 0,001562433 |
| 210517_s_at  | AB003476  | Hs.371240            | A kinase (PRKA) anchor protein (gravin) 12               | AKAP12       | EG2 | 1 | 0 | 4  | 6  | 0,8651132690,896050827 | 9,97E-06 | 0,001562433 |
| 217564_s_at  | W80357    | Hs.149252            | carbonyl-phosphate synthetase 1, mitochondrial           | CPS1         | EG2 | 1 | 0 | 5  | 5  | 0,8651132690,896050827 | 9,97E-06 | 0,001562433 |
| 219441_s_at  | NM_024652 | Hs.513207            | leucine-rich repeat kinase 1                             | LRRK1        | EG2 | 0 | 1 | 0  | 10 | 0,8651132690,896050827 | 9,97E-06 | 0,001562433 |
| 222150_s_at  | AK026747  | Hs.186649, Hs.549342 |                                                          | LOC54103     | EG2 | 1 | 0 | 5  | 5  | 0,8651132690,896050827 | 9,97E-06 | 0,001562433 |
| 224940_s_at  | BF107618  | Hs.494928            | pregnancy-associated plasma protein A, pappalysin 1      | PAPPA        | EG2 | 1 | 0 | 7  | 3  | 0,8651132690,896050827 | 9,97E-06 | 0,001562433 |
| 224941_at    | BF107618  | Hs.494928            | pregnancy-associated plasma protein A, pappalysin 1      | PAPPA        | EG2 | 1 | 0 | 7  | 3  | 0,8651132690,896050827 | 9,97E-06 | 0,001562433 |
| 227997_at    | AW007080  | Hs.150725            | interleukin 17 receptor D                                | IL17RD       | EG2 | 0 | 1 | 5  | 5  | 0,8651132690,896050827 | 9,97E-06 | 0,001562433 |
| 229441_at    | AI569872  | Hs.19545             | frizzled homolog 4 (Drosophila)                          | FZD4         | EG2 | 1 | 0 | 9  | 1  | 0,8651132690,896050827 | 9,97E-06 | 0,001562433 |
| 230831_at    | AW294986  | Hs.368399            | FERM domain containing 5                                 | FRMD5        | EG2 | 1 | 0 | 7  | 3  | 0,8651132690,896050827 | 9,97E-06 | 0,001562433 |
| 235299_at    | AI769269  |                      |                                                          |              | EG2 | 0 | 1 | 7  | 3  | 0,8651132690,896050827 | 9,97E-06 | 0,001562433 |
| 239629_at    | AI634046  | Hs.390736            | CASP8 and FADD-like apoptosis regulator                  | CFLAR        | EG2 | 1 | 0 | 7  | 3  | 0,8651132690,896050827 | 9,97E-06 | 0,001562433 |
| 1552812_a_at | NM_014554 | Hs.371957            | SUMO1/sentrin specific peptidase 1                       | SENP1        | EG2 | 1 | 0 | 5  | 4  | 0,8651132690,896050827 | 8,42E-05 | 0,002977773 |
| 1557275_a_at | BF726849  |                      |                                                          |              | EG2 | 0 | 1 | 0  | 9  | 0,8651132690,896050827 | 8,42E-05 | 0,002977773 |
| 200706_s_at  | NM_004862 | Hs.459940            | lipopolysaccharide-induced TNF factor                    | LITAF        | EG2 | 0 | 1 | 5  | 4  | 0,8651132690,896050827 | 8,42E-05 | 0,002977773 |
| 201645_at    | NM_002160 | Hs.143250            | tenascin C (hexabrachion)                                | TNC          | EG2 | 1 | 0 | 8  | 1  | 0,8651132690,896050827 | 8,42E-05 | 0,002977773 |
| 201801_s_at  | AF079117  | Hs.25450             | solute carrier family 29 (nucleoside transporters), me   | SLC29A1      | EG2 | 0 | 1 | 8  | 1  | 0,8651132690,896050827 | 8,42E-05 | 0,002977773 |
| 202741_at    | AA130247  | Hs.487325            | protein kinase, cAMP-dependent, catalytic, beta          | PRKACB       | EG2 | 1 | 0 | 4  | 5  | 0,8651132690,896050827 | 8,42E-05 | 0,002977773 |
| 205542_at    | NM_012449 | Hs.61635             | six transmembrane epithelial antigen of the prostate     | STEAP1       | EG2 | 0 | 1 | 7  | 2  | 0,8651132690,896050827 | 8,42E-05 | 0,002977773 |
| 205920_at    | NM_003043 | Hs.529488            | solute carrier family 6 (neurotransmitter transporter, t | SLC6A6       | EG2 | 1 | 0 | 7  | 2  | 0,8651132690,896050827 | 8,42E-05 | 0,002977773 |
| 206942_s_at  | NM_002674 | Hs.2182              | pro-melanin-concentrating hormone                        | PMCH         | EG2 | 0 | 1 | 2  | 7  | 0,8651132690,896050827 | 8,42E-05 | 0,002977773 |
| 209505_at    | AI951185  | Hs.519445            | nuclear receptor subfamily 2, group F, member 1          | NR2F1        | EG2 | 1 | 0 | 3  | 6  | 0,8651132690,896050827 | 8,42E-05 | 0,002977773 |
| 211527_x_at  | M27281    | Hs.73793             | vascular endothelial growth factor                       | VEGF         | EG2 | 0 | 1 | 8  | 1  | 0,8651132690,896050827 | 8,42E-05 | 0,002977773 |
| 212382_at    | BF433429  | Hs.200285            | transcription factor 4                                   | TCF4         | EG2 | 0 | 1 | 4  | 5  | 0,8651132690,896050827 | 8,42E-05 | 0,002977773 |
| 212521_s_at  | BE568219  | Hs.9333              | phosphodiesterase 8A                                     | PDE8A        | EG2 | 0 | 1 | 3  | 6  | 0,8651132690,896050827 | 8,42E-05 | 0,002977773 |
| 213295_at    | AA555096  | Hs.432993            | cylindromatosis (turban tumor syndrome)                  | CYLD         | EG2 | 1 | 0 | 4  | 5  | 0,8651132690,896050827 | 8,42E-05 | 0,002977773 |
| 214023_x_at  | AL533838  | Hs.300701            |                                                          | TUBB-PARALOG | EG2 | 0 | 1 | 1  | 8  | 0,8651132690,896050827 | 8,42E-05 | 0,002977773 |
| 222668_at    | W73820    | Hs.221873            | potassium channel tetramerisation domain containing      | KCTD15       | EG2 | 0 | 1 | 6  | 3  | 0,8651132690,896050827 | 8,42E-05 | 0,002977773 |
| 222717_at    | BF982174  | Hs.26530             | serum deprivation response (phosphatidylserine bind      | SDPR         | EG2 | 1 | 0 | 5  | 4  | 0,8651132690,896050827 | 8,42E-05 | 0,002977773 |
| 224002_s_at  | AF100751  | Hs.410378            | FK506 binding protein 7                                  | FKBP7        | EG2 | 0 | 1 | 7  | 2  | 0,8651132690,896050827 | 8,42E-05 | 0,002977773 |
| 224719_s_at  | BG339653  | Hs.405913            |                                                          | GRCC10       | EG2 | 0 | 1 | 5  | 4  | 0,8651132690,896050827 | 8,42E-05 | 0,002977773 |
| 224817_at    | W93554    | Hs.549085            | neuralized-like (Drosophila)                             | NEURL        | EG2 | 1 | 0 | 4  | 5  | 0,8651132690,896050827 | 8,42E-05 | 0,002977773 |



|              |           |            |                                                          |           |     |   |   |   |   |                        |          |             |
|--------------|-----------|------------|----------------------------------------------------------|-----------|-----|---|---|---|---|------------------------|----------|-------------|
| 224837_at    | AW080845  | Hs.431498  | forkhead box P1                                          | FOXP1     | EG2 | 0 | 1 | 4 | 5 | 0,8651132690,896050827 | 8,42E-05 | 0,002977773 |
| 225653_at    | AV755269  | Hs.446350  | transforming growth factor, beta receptor associated     | TGFBRAP1  | EG2 | 0 | 1 | 5 | 4 | 0,8651132690,896050827 | 8,42E-05 | 0,002977773 |
| 226719_at    | AI868039  |            |                                                          |           | EG2 | 0 | 1 | 9 | 0 | 0,8651132690,896050827 | 8,42E-05 | 0,002977773 |
| 226771_at    | AB032963  | Hs.435700  | ATPase, Class I, type 8B, member 2                       | ATP8B2    | EG2 | 0 | 1 | 4 | 5 | 0,8651132690,896050827 | 8,42E-05 | 0,002977773 |
| 229830_at    | AW205919  | Hs.376032, | H platelet-derived growth factor alpha polypeptide       | PDGFA     | EG2 | 0 | 1 | 2 | 7 | 0,8651132690,896050827 | 8,42E-05 | 0,002977773 |
| 230748_at    | AI873273  | Hs.42645   | solute carrier family 16 (monocarboxylic acid transpor   | SLC16A6   | EG2 | 0 | 1 | 7 | 2 | 0,8651132690,896050827 | 8,42E-05 | 0,002977773 |
| 231403_at    | N21108    | Hs.130031  | triple functional domain (PTPRF interacting)             | TRIO      | EG2 | 0 | 1 | 6 | 3 | 0,8651132690,896050827 | 8,42E-05 | 0,002977773 |
| 235508_at    | AW291023  | Hs.526464  | promyelocytic leukemia                                   | PML       | EG2 | 1 | 0 | 8 | 1 | 0,8651132690,896050827 | 8,42E-05 | 0,002977773 |
| 237169_at    | AI266750  | Hs.143250  | tenascin C (hexabrachion)                                | TNC       | EG2 | 1 | 0 | 9 | 0 | 0,8651132690,896050827 | 8,42E-05 | 0,002977773 |
| 242979_at    | AI474666  |            |                                                          |           | EG2 | 1 | 0 | 3 | 6 | 0,8651132690,896050827 | 8,42E-05 | 0,002977773 |
| 217853_at    | NM_022748 | Hs.520814  | tensin 3                                                 | TNS3      | EG2 | 0 | 0 | 5 | 7 | 1 0,896050827          | 7,43E-08 | 0,001562433 |
| 204203_at    | NM_001806 | Hs.429666  | CCAAT/enhancer binding protein (C/EBP), gamma            | CEBPG     | EG2 | 0 | 0 | 8 | 3 | 1 0,896050827          | 9,59E-07 | 0,001562433 |
| 209199_s_at  | N22468    | Hs.444409  | MADS box transcription enhancer factor 2, polypeptid     | MEF2C     | EG2 | 0 | 0 | 8 | 3 | 1 0,896050827          | 9,59E-07 | 0,001562433 |
| 210041_s_at  | BC001258  | Hs.553496  | phosphoglucosyltransferase 3                             | PGM3      | EG2 | 0 | 0 | 6 | 4 | 1 0,896050827          | 9,97E-06 | 0,001562433 |
| 213664_at    | AW235061  | Hs.444915  | solute carrier family 1 (neuronal/epithelial high affini | SLC1A1    | EG2 | 0 | 0 | 7 | 3 | 1 0,896050827          | 9,97E-06 | 0,001562433 |
| 213895_at    | BF445047  | Hs.436298  | epithelial membrane protein 1                            | EMP1      | EG2 | 0 | 0 | 6 | 4 | 1 0,896050827          | 9,97E-06 | 0,001562433 |
| 224838_at    | AK026898  | Hs.431498  | forkhead box P1                                          | FOXP1     | EG2 | 0 | 0 | 4 | 6 | 1 0,896050827          | 9,97E-06 | 0,001562433 |
| 225362_at    | AI341165  | Hs.404706  |                                                          | LOC159090 | EG2 | 0 | 0 | 5 | 5 | 1 0,896050827          | 9,97E-06 | 0,001562433 |
| 228335_at    | AW264204  | Hs.31595   | claudin 11 (oligodendrocyte transmembrane protein)       | CLDN11    | EG2 | 0 | 0 | 3 | 7 | 1 0,896050827          | 9,97E-06 | 0,001562433 |
| 39582_at     | AL050166  | Hs.432993  | cylindromatosis (turban tumor syndrome)                  | CYLD      | EG2 | 0 | 0 | 5 | 5 | 1 0,896050827          | 9,97E-06 | 0,001562433 |
| 1554795_a_at | BC019895  | Hs.530101  | filamin binding LIM protein 1                            | FBLIM1    | EG2 | 0 | 0 | 1 | 8 | 1 0,896050827          | 8,42E-05 | 0,002977773 |
| 207265_s_at  | NM_016657 | Hs.554798  | KDEL (Lys-Asp-Glu-Leu) endoplasmic reticulum protei      | KDEL3     | EG2 | 0 | 0 | 6 | 3 | 1 0,896050827          | 8,42E-05 | 0,002977773 |
| 210026_s_at  | AY028896  | Hs.57973   | caspase recruitment domain family, member 10             | CARD10    | EG2 | 0 | 0 | 1 | 8 | 1 0,896050827          | 8,42E-05 | 0,002977773 |
| 210138_at    | AF074979  | Hs.368733  | regulator of G-protein signalling 20                     | RGS20     | EG2 | 0 | 0 | 7 | 2 | 1 0,896050827          | 8,42E-05 | 0,002977773 |
| 212816_s_at  | BE613178  | Hs.533013  | cystathionine-beta-synthase                              | CBS       | EG2 | 0 | 0 | 4 | 5 | 1 0,896050827          | 8,42E-05 | 0,002977773 |
| 213358_at    | AB018345  | Hs.464563  | KIAA0802                                                 | KIAA0802  | EG2 | 0 | 0 | 3 | 6 | 1 0,896050827          | 8,42E-05 | 0,002977773 |
| 220161_s_at  | NM_019114 | Hs.269180  | erythrocyte membrane protein band 4.1 like 4B            | EPB41L4B  | EG2 | 0 | 0 | 1 | 8 | 1 0,896050827          | 8,42E-05 | 0,002977773 |
| 224204_x_at  | AF231339  | Hs.434269  | aryl hydrocarbon receptor nuclear translocator-like 2    | ARNTL2    | EG2 | 0 | 0 | 2 | 7 | 1 0,896050827          | 8,42E-05 | 0,002977773 |
| 230121_at    | BF508679  |            |                                                          |           | EG2 | 0 | 0 | 2 | 7 | 1 0,896050827          | 8,42E-05 | 0,002977773 |
| 237466_s_at  | AW444502  | Hs.507991  | hedgehog interacting protein                             | HHIP      | EG2 | 0 | 0 | 0 | 9 | 1 0,896050827          | 8,42E-05 | 0,002977773 |
| 241387_at    | AW276701  | Hs.395482  | PTK2 protein tyrosine kinase 2                           | PTK2      | EG2 | 0 | 0 | 3 | 6 | 1 0,896050827          | 8,42E-05 | 0,002977773 |
