# Supplementary material for: Identification of evolutionarily conserved genetic regulators of cellular aging
Source: PubMed Central journal article supplement (PMC2997327; doi:10.1111/j.1474-9726.2010.00637.x), 2010-12
Supplement: acel0009-1084-SD7.pdf [file acel0009-1084-SD7.pdf]

| Probe Set ID | Gene Symbol | Gene Title                                                                    | Ensembl | SGD accession number |
|--------------|-------------|-------------------------------------------------------------------------------|---------|----------------------|
| 1779132_at   | AIP1        | Actin cortical patch component, interacts with the actin depolymerizing fact  | YMR092C | S000004698           |
| 1776624_at   | ALD4        | Mitochondrial aldehyde dehydrogenase, required for growth on ethanol and      | YOR374W | S000005901           |
| 1771943_at   | ALD5        | Mitochondrial aldehyde dehydrogenase, involved in regulation or biosynthe     | YER073W | S000000875           |
| 1779402_at   | ALG5        | UDP-glucose:dolichyl-phosphate glucosyltransferase, involved in asparagine    | YPL227C | S000006148           |
| 1778563_at   | ALT2        | Putative alanine transaminase (glutamic pyruvic transaminase)                 | YDR111C | S000002518           |
| 1770280_at   | APM1        | Mu1-like medium subunit of the clathrin-associated protein complex (AP-1);    | YPL259C | S000006180           |
| 1776418_at   | ARF1        | ADP-ribosylation factor, GTPase of the Ras superfamily involved in regulatio  | YDL192W | S000002351           |
| 1774082_at   | ATG18       | Phosphoinositide binding protein required for vesicle formation in autophya   | YFR021W | S000001917           |
| 1779762_at   | CAF40       | Evolutionarily conserved subunit of the CCR4-NOT complex involved in contr    | YNL288W | S000005232           |
| 1776167_at   | CHD1        | Nucleosome remodeling factor that functions in regulation of transcription e  | YER164W | S000000966           |
| 1777009_at   | CHK1        | Serine/threonine kinase and DNA damage checkpoint effector, mediates cel      | YBR274W | S000000478           |
| 1777889_at   | CHL1        | Conserved nuclear protein required to establish sister-chromatid pairing dur  | YPL008W | S000005929           |
| 1769973_at   | CLB1        | B-type cyclin involved in cell cycle progression; activates Cdc28p to promote | YGR108W | S000003340           |
| 1776774_at   | CLB2        | B-type cyclin involved in cell cycle progression; activates Cdc28p to promote | YPR119W | S000006323           |
| 1773548_at   | CYC1        | Cytochrome c, isoform 1; electron carrier of the mitochondrial intermembra    | YJR048W | S000003809           |
| 1773888_at   | CYS3        | Cystathionine gamma-lyase, catalyzes one of the two reactions involved in t   | YAL012W | S000000010           |
| 1775526_at   | CYS4        | Cystathionine beta-synthase, catalyzes the synthesis of cystathionine from s  | YGR155W | S000003387           |
| 1769674_at   | DBP1        | Putative ATP-dependent RNA helicase of the DEAD-box protein family; muta      | YPL119C | S000006040           |
| 1773176_at   | DIE2        | Dolichyl-phosphoglucose-dependent alpha-1,2 glucosyltransferase of the ER     | YGR227W | S000003459           |
| 1772590_at   | DNF1        | Aminophospholipid translocase (flippase) that localizes primarily to the plas | YER166W | S000000968           |
| 1771781_at   | DPH5        | Methyltransferase required for synthesis of diphthamide, which is a modifie   | YLR172C | S000004162           |
| 1774346_at   | ENO1        | Enolase I, a phosphopyruvate hydratase that catalyzes the conversion of 2-p   | YGR254W | S000003486           |
| 1778104_at   | ERG24       | C-14 sterol reductase, acts in ergosterol biosynthesis; mutants accumulate th | YNL280C | S000005224           |
| 1777611_at   | ERP6        | Protein with similarity to Emp24p and Erv25p, member of the p24 family invo   | YGL002W | S000002970           |
| 1779105_at   | GSY2        | Glycogen synthase, similar to Gsy1p; expression induced by glucose limitatio  | YLR258W | S000004248           |
| 1778399_at   | HAP3        | Subunit of the heme-activated, glucose-repressed Hap2p/3p/4p/5p CCAAT-b       | YBL021C | S000000117           |
| 1775160_at   | HAT1        | Catalytic subunit of the Hat1p-Hat2p histone acetyltransferase complex that   | YPL001W | S000005922           |

|            |         |                                                                                            |         |            |
|------------|---------|--------------------------------------------------------------------------------------------|---------|------------|
| 1776159_at | HRT3    | Putative SCF-ubiquitin ligase F-box protein, based on both genetic and physi               | YLR097C | S000004087 |
| 1775235_at | HTA2    | Histone H2A, core histone protein required for chromatin assembly and chro                 | YBL003C | S000000099 |
| 1775976_at | HXK1    | Hexokinase isoenzyme 1, a cytosolic protein that catalyzes phosphorylation                 | YFR053C | S000001949 |
| 1777461_at | IBA57 / | Mitochondrial matrix protein involved in the incorporation of iron-sulfur clu              | YJR122W | S000003883 |
| 1779660_at | IDP2    | Cytosolic NADP-specific isocitrate dehydrogenase, catalyzes oxidation of iso               | YLR174W | S000004164 |
| 1777183_at | INP53   | Polyphosphatidylinositol phosphatase, dephosphorylates multiple phospho                    | YOR109W | S000005635 |
| 1769462_at | KGD1    | Component of the mitochondrial alpha-ketoglutarate dehydrogenase compl                     | YIL125W | S000001387 |
| 1779214_at | LHS1    | Molecular chaperone of the endoplasmic reticulum lumen, involved in poly                   | YKL073W | S000001556 |
| 1770534_at | LSB6    | Type II phosphatidylinositol 4-kinase that binds Las17p, which is a homolog o              | YJL100W | S000003636 |
| 1772003_at | LYS9    | Saccharopine dehydrogenase (NADP+, L-glutamate-forming); catalyzes the f                   | YNR050C | S000005333 |
| 1770927_at | MAD2    | Component of the spindle-assembly checkpoint complex, which delays the                     | YJL030W | S000003567 |
| 1772731_at | MRE11   | Subunit of a complex with Rad50p and Xrs2p (MRX complex) that functions in                 | YMR224C | S000004837 |
| 1774349_at | MRT4    | Protein involved in mRNA turnover and ribosome assembly, localizes to the                  | YKL009W | S000001492 |
| 1770036_at | MSH2    | Protein that forms heterodimers with Msh3p and Msh6p that bind to DNA mi                   | YOL090W | S000005450 |
| 1776554_at | MSH5    | Protein of the MutS family, forms a dimer with Msh4p that facilitates crossov              | YDL154W | S000002313 |
| 1775548_at | MSH6    | Protein required for mismatch repair in mitosis and meiosis, forms a comple                | YDR097C | S000002504 |
| 1780201_at | MSW1    | Mitochondrial tryptophanyl-tRNA synthetase                                                 | YDR268W | S000002676 |
| 1772812_at | NCR1    | Vacuolar membrane protein that transits through the biosynthetic vacuolar                  | YPL006W | S000005927 |
| 1772041_at | NPL3    | RNA-binding protein that promotes elongation, regulates termination, and c                 | YDR432W | S000002840 |
| 1772463_at | NUP170  | Subunit of the nuclear pore complex (NPC), required for NPC localization of                | YBL079W | S000000175 |
| 1769993_at | PCH2    | Nucleolar component of the pachytene checkpoint, which prevents chromos                    | YBR186W | S000000390 |
| 1776029_at | PER1    | Protein of the endoplasmic reticulum, required for GPI-phospholipase A2 ac                 | YCR044C | S000000640 |
| 1777099_at | PEX13   | Integral peroxisomal membrane required for the translocation of peroxisom                  | YLR191W | S000004181 |
| 1769766_at | PHO89   | Na <sup>+</sup> /Pi cotransporter, active in early growth phase; similar to phosphate tran | YBR296C | S000000500 |
| 1776390_at | PIM1    | ATP-dependent Lon protease, involved in degradation of misfolded proteins                  | YBL022C | S000000118 |
| 1776097_at | PRS3    | 5-phospho-ribosyl-1(alpha)-pyrophosphate synthetase, synthesizes PRPP, w                   | YHL011C | S000001003 |
| 1773162_at | PRY1    | Protein of unknown function                                                                | YJL079C | S000003615 |
| 1770697_at | PTC5    | Mitochondrial type 2C protein phosphatase involved in regulation of pyruvat                | YOR090C | S000005616 |

|              |               |                                                                                 |                       |                           |
|--------------|---------------|---------------------------------------------------------------------------------|-----------------------|---------------------------|
| 1777959_at   | RAD27         | 5' to 3' exonuclease, 5' flap endonuclease, required for Okazaki fragment pro   | YKL113C               | S000001596                |
| 1774709_at   | REV3          | Catalytic subunit of DNA polymerase zeta, which is involved in DNA repair an    | YPL167C               | S000006088                |
| 1775076_at   | RNH201        | Ribonuclease H2 catalytic subunit, removes RNA primers during Okazaki frag      | YNL072W               | S000005016                |
| 1780044_at   | RNR3          | One of two large regulatory subunits of ribonucleotide-diphosphate reducta      | YIL066C               | S000001328                |
| 1770882_at   | RPL13B        | Protein component of the large (60S) ribosomal subunit, nearly identical to     | YMR142C               | S000004750                |
| 1769929_at   | RPL22B        | Protein component of the large (60S) ribosomal subunit, has similarity to Rpl   | YFL034C-A             | S000006436                |
| 1779599_at   | RPL31A        | Protein component of the large (60S) ribosomal subunit, nearly identical to     | YDL075W               | S000002233                |
| 1770284_at   | RPL37A        | Protein component of the large (60S) ribosomal subunit, has similarity to Rpl   | YLR185W               | S000004175                |
| 1779559_at   | RPL43B        | Protein component of the large (60S) ribosomal subunit, identical to Rpl43A     | YJR094W-A             | S000003855                |
| 1774801_at   | SER1          | 3-phosphoserine aminotransferase, catalyzes the formation of phosphoseri        | YOR184W               | S000005710                |
| 1773718_at   | SGT2          | Glutamine-rich cytoplasmic protein of unknown function; contains tetratrico     | YOR007C               | S000005533                |
| 1774806_at   | SHM1          | Mitochondrial serine hydroxymethyltransferase, converts serine to glycine p     | YBR263W               | S000000467                |
| 1776295_at   | SIZ1          | SUMO/Smt3 ligase that promotes the attachment of sumo (Smt3p; small ubi         | YDR409W               | S000002817                |
| 1773984_at   | SLH1          | Putative RNA helicase related to Ski2p, involved in translation inhibition of   | YGR271W               | S000003503                |
| 1773993_at   | SOD2          | Mitochondrial superoxide dismutase, protects cells against oxygen toxicity;     | YHR008C               | S000001050                |
| 1778906_at   | SPE2          | S-adenosylmethionine decarboxylase, required for the biosynthesis of sper       | YOL052C               | S000005412                |
| 1779158_at   | SSA3          | ATPase involved in protein folding and the response to stress; plays a role in  | YBL075C               | S000000171                |
| 1774186_at   | SSF1          | Constituent of 66S pre-ribosomal particles, required for ribosomal large sub    | YHR066W               | S000001108                |
| 1772868_at   | SSN3          | Cyclin-dependent protein kinase, component of RNA polymerase II holoenz         | YPL042C               | S000005963                |
| 1776891_at   | SSO1          | Plasma membrane t-SNARE involved in fusion of secretory vesicles at the pl      | YPL232W               | S000006153                |
| 1774055_at   | SYG1          | Plasma membrane protein of unknown function; truncation and overexpress         | YIL047C /// YIL047C-A | S000001309 /// S000028790 |
| 1772447_at   | SYM1          | Protein required for ethanol metabolism; induced by heat shock and localize     | YLR251W               | S000004241                |
| 1779786_s_at | TIF1 /// TIF2 | Translation initiation factor eIF4A, identical to Tif2p; DEA(D/H)-box RNA heli  | YJL138C /// YKR059W   | S000001767 /// S000003674 |
| 1771027_at   | TIF3          | Translation initiation factor eIF-4B, has RNA annealing activity; contains an R | YPR163C               | S000006367                |
| 1771925_at   | TPK1          | cAMP-dependent protein kinase catalytic subunit; promotes vegetative gro        | YJL164C               | S000003700                |
| 1774482_at   | TRX1          | Cytoplasmic thioredoxin isoenzyme of the thioredoxin system which protect       | YLR043C               | S000004033                |
| 1774387_at   | UBC11         | Ubiquitin-conjugating enzyme most similar in sequence to Xenopus ubiquiti       | YOR339C               | S000005866                |
| 1771212_at   | UBC12         | Enzyme that mediates the conjugation of Rub1p, a ubiquitin-like protein, to     | YLR306W               | S000004297                |

|            |      |                                                                                |         |            |
|------------|------|--------------------------------------------------------------------------------|---------|------------|
| 1774010_at | UGA1 | Gamma-aminobutyrate (GABA) transaminase (4-aminobutyrate aminotransf           | YGR019W | S000003251 |
| 1775990_at | YDC1 | Alkaline dihydroceramidase, involved in sphingolipid metabolism; preferen      | YPL087W | S000006008 |
| 1775390_at | YPK2 | Protein kinase with similarity to serine/threonine protein kinase Ypk1p; func  | YMR104C | S000004710 |
| 1774772_at | YTA7 | Protein that localizes to chromatin and has a role in regulation of histone ge | YGR270W | S000003502 |
